# Supplementary material for: Exploring the flavor formation mechanism under osmotic conditions during soy sauce fermentation in Aspergillus oryzae by proteomic analysis
Source: Royal Society of Chemistry journal article supplement (doi:10.1039/c9fo02314c), 2019-12-16
Supplement: c9fo02314c1.pdf [file c9fo02314c1.pdf]

**Figure S1.** The subcellular location of proteins (0-28C-L vs 0-16C-L). (a) up-regulated proteins; (b) down-regulated proteins

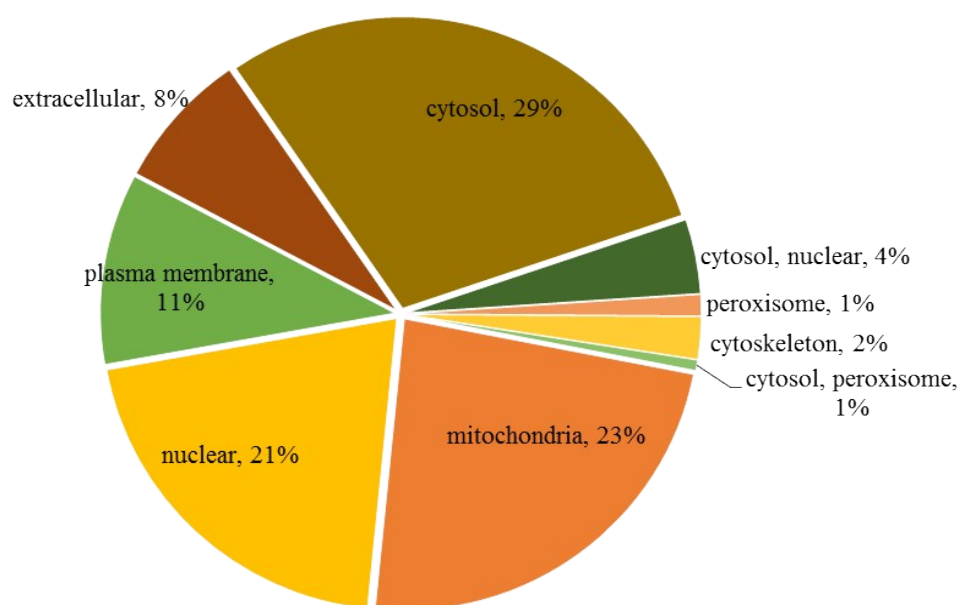

(a)

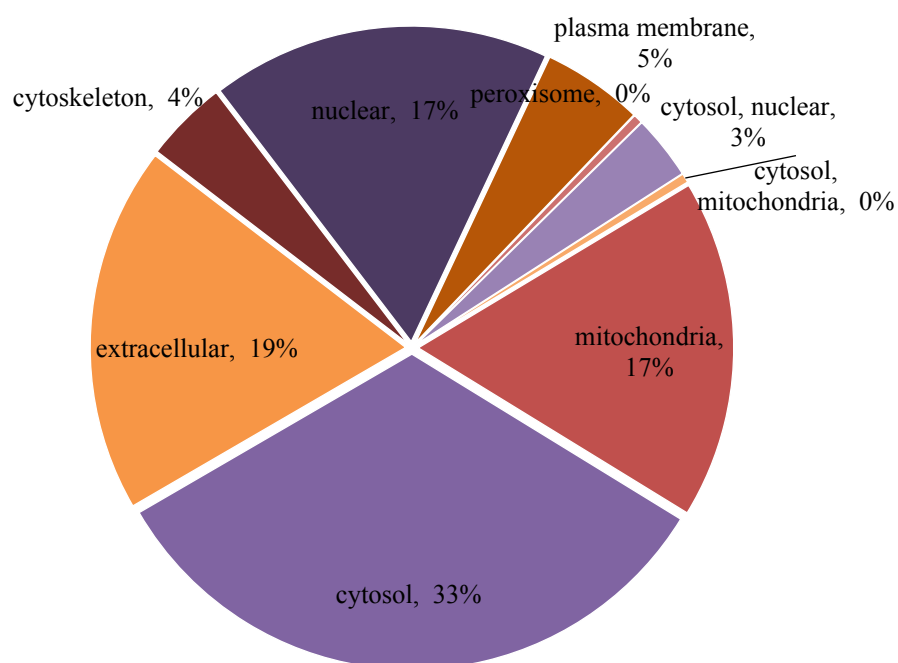

(b)

**Figure S2.** The subcellular location of proteins (0-28C-S vs 0-16C-S). (a) up-regulated proteins; (b) down-regulated proteins

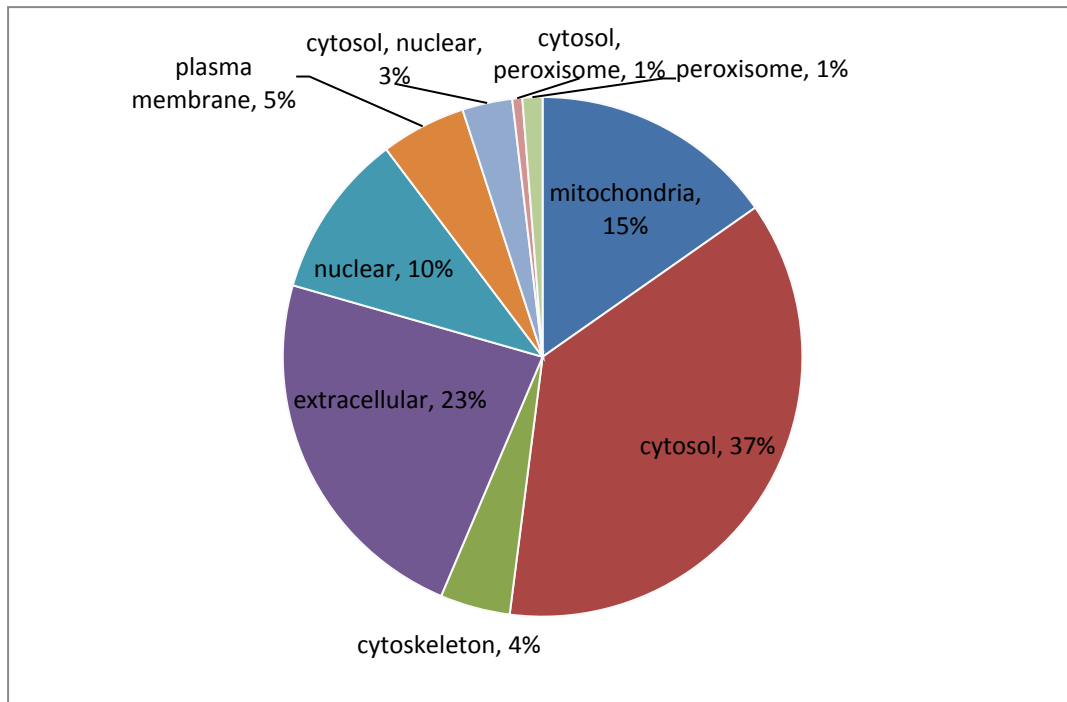

(a)

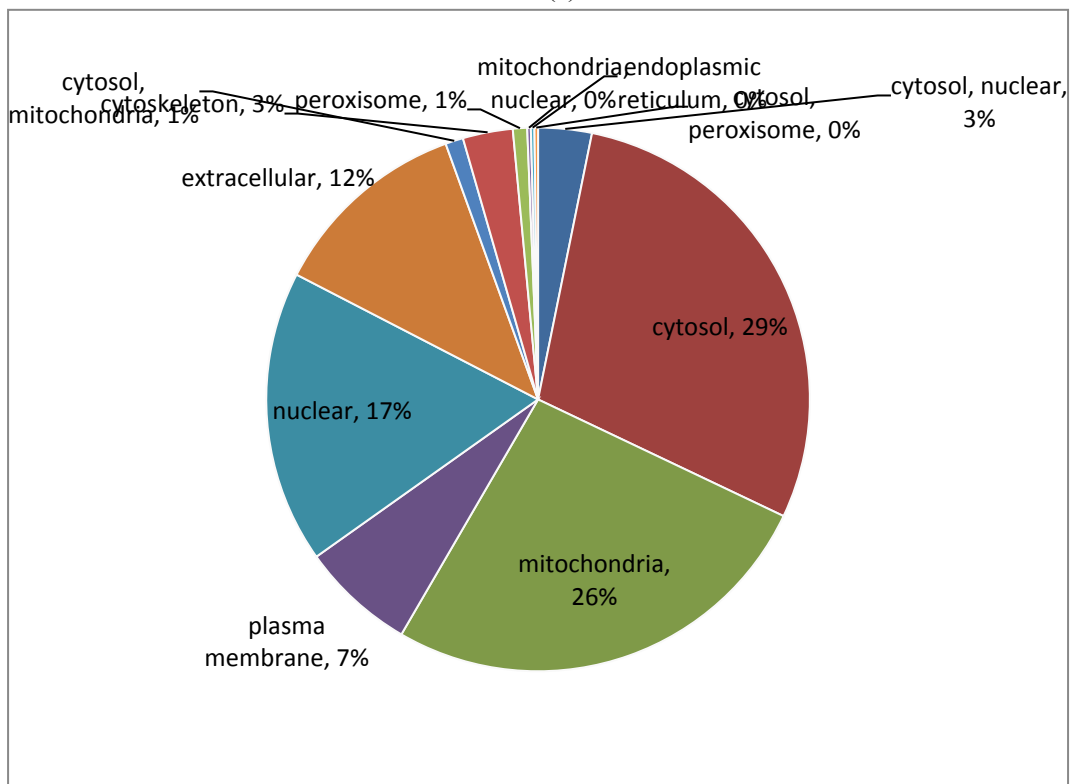

(b)

**Figure S3.** The subcellular location of proteins (0-28C-L vs 12-28C-L). (a) up-regulated proteins; (b) down-regulated proteins

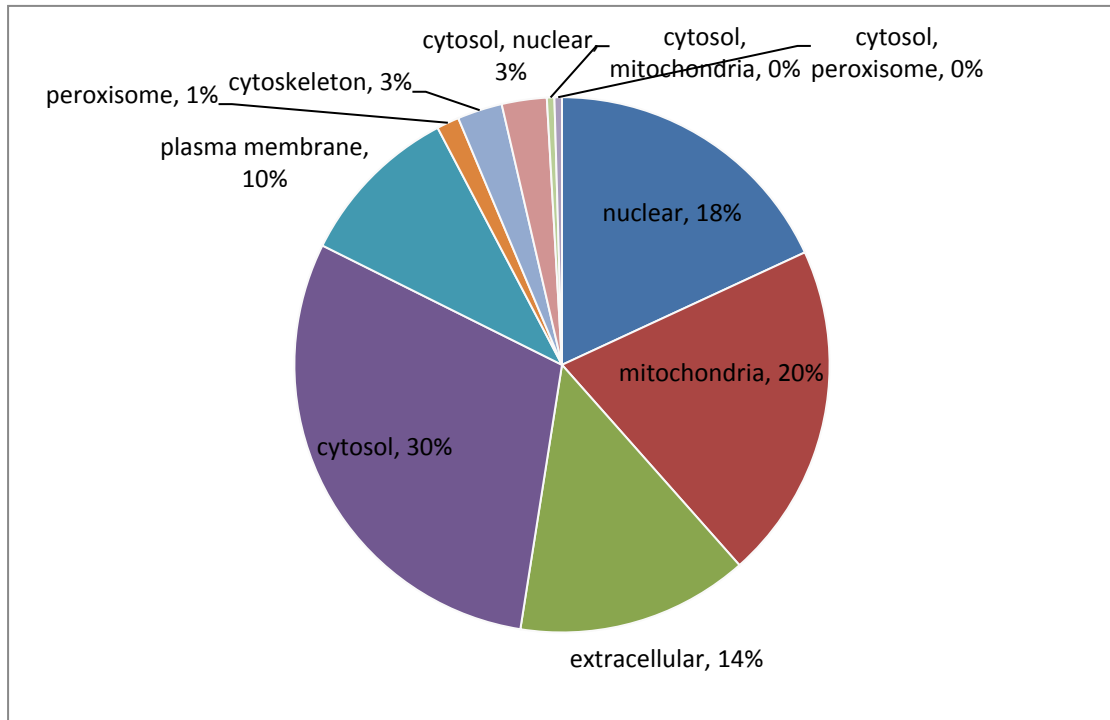

(a)

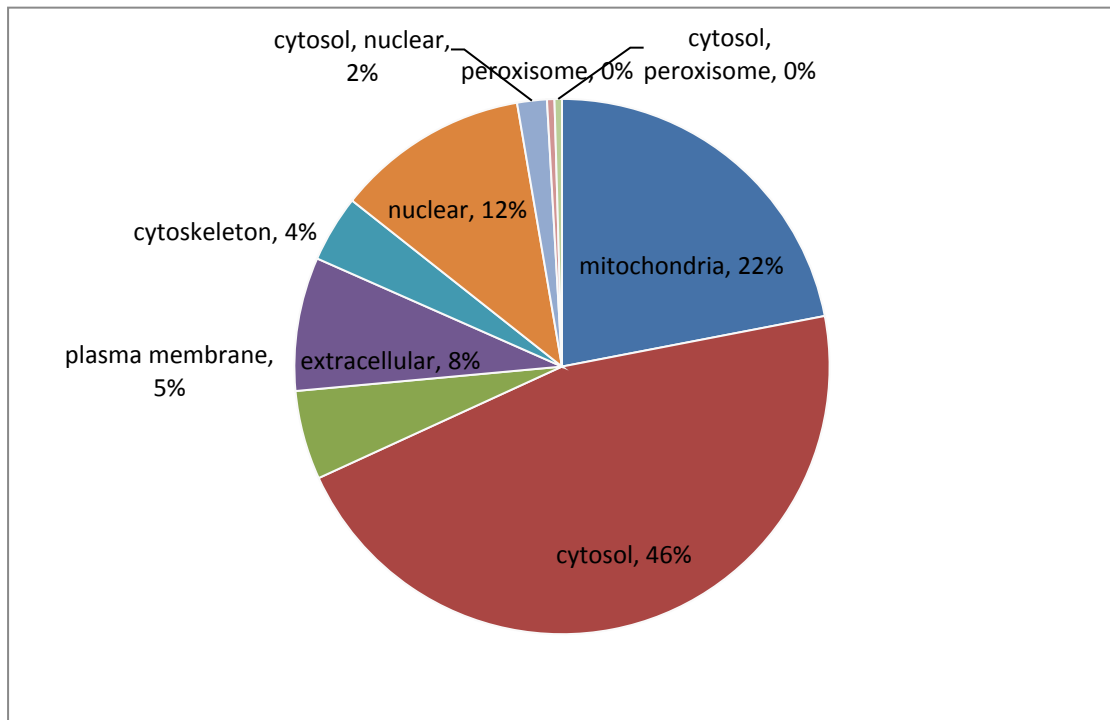

(b)

**Figure S4.** The subcellular location of proteins (0-28C-S vs 12-28C-S). (a) up-regulated proteins; (b) down-regulated proteins

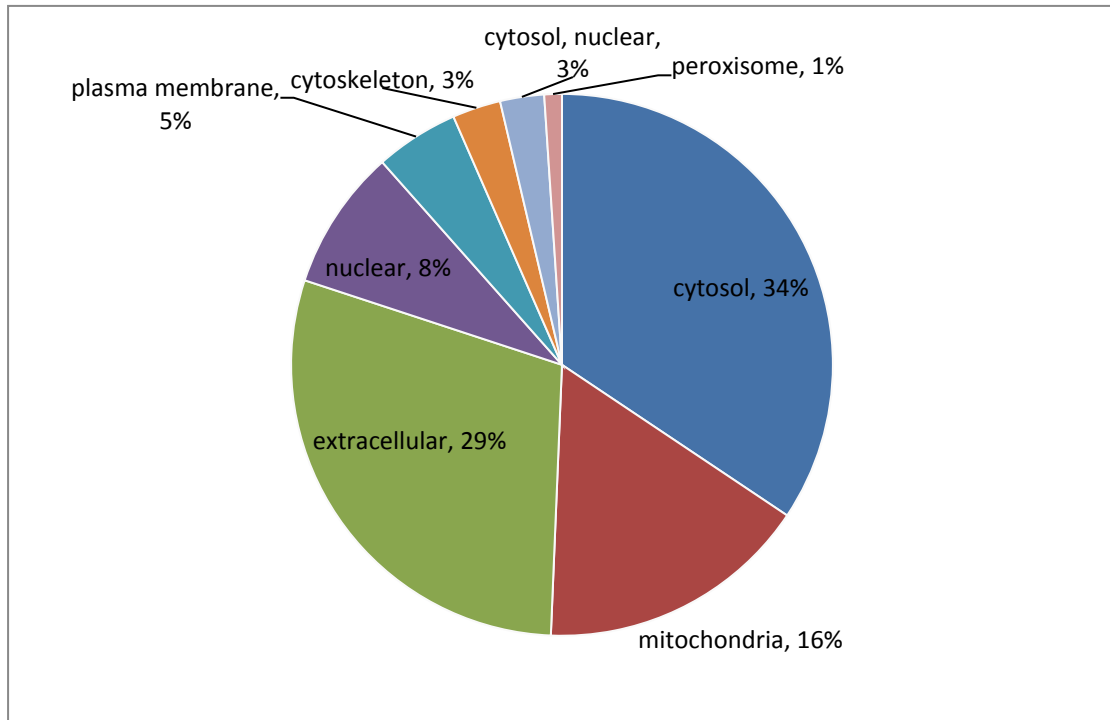

(a)

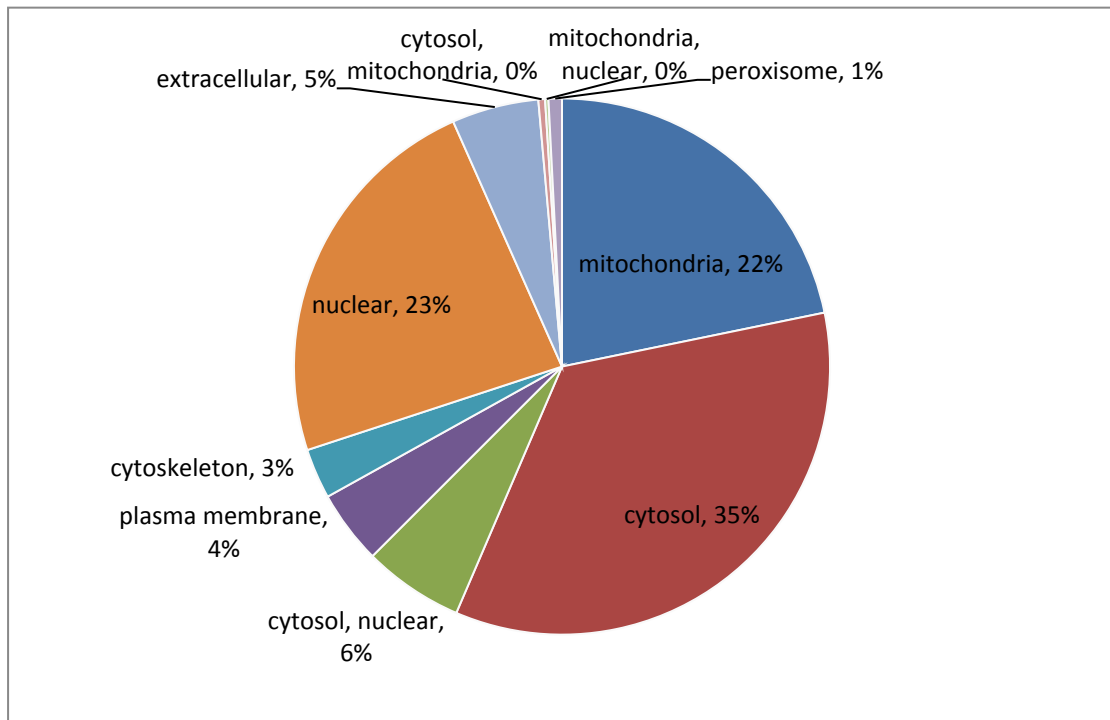

(b)
