# Supplementary material for: Exploring the flavor formation mechanism under osmotic conditions during soy sauce fermentation in Aspergillus oryzae by proteomic analysis
Source: Royal Society of Chemistry journal article supplement (doi:10.1039/c9fo02314c), 2019-12-16
Supplement: c9fo02314c3.pdf [file c9fo02314c3.pdf]

**Table S2.** Differentially quantified proteins in this study

| Name                 | Up-regulated (>1.5) | Down-regulated (<0.67) |
|----------------------|---------------------|------------------------|
| 0-16C-S vs 0-16C-L   | 605                 | 789                    |
| 0-28C-L vs 0-16C-L   | 170                 | 213                    |
| 0-28C-L vs 12-28C-L  | 221                 | 223                    |
| 0-28C-S vs 0-16C-S   | 321                 | 471                    |
| 0-28C-S vs 0-28C-L   | 613                 | 970                    |
| 0-28C-S vs 12-28C-S  | 381                 | 496                    |
| 12-28C-S vs 12-28C-L | 460                 | 684                    |

Note:  $p < 0.05$ .

0-16C-S means that the salt content is 0, at 16°C, solid fermentation;

0-16C-L means that the salt content is 0, at 16°C, submerged fermentation;

0-28C-L: means that the salt content is 0, at 28°C, submerged fermentation;

0-28C-S: means that the salt content is 0, at 28°C, solid fermentation;

12-28C-L: means that the salt content is 12, at 28°C, submerged fermentation;

12-28C-S: means that the salt content is 12, at 28°C, solid fermentation.
