# Supplementary material for: Exploring the flavor formation mechanism under osmotic conditions during soy sauce fermentation in Aspergillus oryzae by proteomic analysis
Source: Royal Society of Chemistry journal article supplement (doi:10.1039/c9fo02314c), 2019-12-16
Supplement: c9fo02314c4.xlsx [file c9fo02314c4.xlsx]

## Sheet: 0-16C-Svs0-16C-L diff protein
Protein accession	Protein description	0-16C-Svs0-16C-L Ratio	Regulated Type	P value	Gene name	MW [kDa]	Score	Coverage [%]	#Peptides	#PSMs	#Unique peptides	Subcellular Location	Biological Process	Cellular Component	Molecular Function	KEGG KO No.	KEGG Gene	KEGG pathway	IPR ID	Domain description	KOG category	KOG number	KOG description
A0A064AIR7		1.521	Up	5.27993e-07	AO1008_11918	150.06	48.846	12.7	15	28	15	nuclear
A0A064AKT4	Peptide chain release factor 1	0.524	Down	3e-07	AO1008_02030	48.572	107.73	34.6	12	30	12	cytosol, nuclear	cellular component organization; protein complex subunit organization; cellular protein metabolic process; single-organism cellular process; single-organism process; macromolecular complex disassembly; biosynthetic process; primary metabolic process; cellular metabolic process; organic substance biosynthetic process; cellular biosynthetic process; protein complex disassembly; macromolecular compl…	intracellular part; cell; cell part; intracellular; cytoplasm;	organic cyclic compound binding; translation termination factor activity; heterocyclic compound binding; RNA binding; translation factor activity, nucleic acid binding; binding; nucleic acid binding; translation release factor activity, codon specific; translation release factor activity;	K03265	ETF1; peptide chain release factor subunit 1	aor03015 mRNA surveillance pathway - Aspergillus oryzae;	IPR005141; IPR029064; IPR005142; IPR005140; IPR024049;	eRF1 domain 2; 50S ribosomal protein L30e-like; eRF1 domain 3; eRF1 domain 1/Pelota-like; Peptide Chain Release Factor eRF1/aRF1, N-terminal;	[J]	KOG0688	Peptide chain release factor 1 (eRF1)
A0A064AMP7	Amino acid transporter	0.517	Down	0.00418895	AO1008_02031	69.357	22.973	7.2	3	4	3	plasma membrane				K15015			IPR013057;	Amino acid transporter, transmembrane domain;	[E]	KOG1303	Amino acid transporters
A0A064AMQ0	Nucleosome assembly protein	4.351	Up	9.44964e-11	AO1008_02046	46.314	86.321	30	12	23	12	nuclear	cellular component biogenesis; cellular component organization; nucleosome organization; cellular macromolecular complex assembly; chromatin assembly or disassembly; protein complex subunit organization; macromolecular complex subunit organization; protein-DNA complex assembly; DNA packaging; nucleosome assembly; chromosome organization; cellular component assembly; macromolecular complex assembl…	organelle; intracellular membrane-bounded organelle; intracellular organelle; nucleus; cell part; intracellular; intracellular part; membrane-bounded organelle; cell;		K11279					[BD]	KOG1507	Nucleosome assembly protein NAP-1
A0A064AN78		0.491	Down	9.72763e-05	AO1008_03110	110.03	29.707	9.2	8	11	8	plasma membrane			protein binding; binding;				IPR011989; IPR016024;	Armadillo-like helical; Armadillo-type fold;	[R]	KOG1293	Proteins containing armadillo/beta-catenin-like repeat
A0A064ANI3	"Exo-beta-1,3-glucanase Exg0"	3.182	Up	0.0110089	AO1008_01591	85.212	37.835	10.1	5	6	5	cytosol, nuclear							IPR011050; IPR012334;	Pectin lyase fold/virulence factor; Pectin lyase fold;
A0A064ANL0	"Putative alpha-1,2-mannosidase"	2.414	Up	0.00200309	AO1008_11664	85.168	17.236	6.3	4	5	3	extracellular	metabolic process; carbohydrate metabolic process; primary metabolic process; organic substance metabolic process;		carbohydrate binding; catalytic activity; binding;				IPR014718; IPR008928; IPR012939;	Glycoside hydrolase-type carbohydrate-binding; Six-hairpin glycosidase-like; Glycosyl hydrolase family 92;
A0A064ARU8	Ras-related GTPase	0.319	Down	6.93912e-05	AO1008_02051	20.877	7.7431	12.3	2	5	2	mitochondria	regulation of cellular process; single organism signaling; cellular response to stimulus; signal transduction; regulation of biological process; cell communication; intracellular signal transduction; single-organism cellular process; single-organism process; small GTPase mediated signal transduction; signaling; response to stimulus; cellular process; biological regulation;	membrane;	nucleoside phosphate binding; nucleoside binding; ion binding; nucleotide binding; organic cyclic compound binding; heterocyclic compound binding; ribonucleoside binding; carbohydrate derivative binding; ribonucleotide binding; binding; purine ribonucleoside binding; anion binding; purine ribonucleotide binding; purine nucleoside binding; guanyl ribonucleotide binding; guanyl nucleotide binding; …	K07208			IPR005225; IPR027417;	Small GTP-binding protein domain; P-loop containing nucleoside triphosphate hydrolase;	[R]	KOG0395	Ras-related GTPase
A0A064AU66	"C6 finger domain protein, putative [Aspergillus oryzae 3.042]"	0.498	Down	0.0207	AO1008_03965	58.895	9.0006	6.1	3	3	3	nuclear	regulation of cellular process; regulation of gene expression; regulation of transcription, DNA-templated; regulation of cellular biosynthetic process; regulation of primary metabolic process; regulation of macromolecule metabolic process; regulation of nucleobase-containing compound metabolic process; regulation of macromolecule biosynthetic process; regulation of cellular metabolic process; reg…	organelle; intracellular membrane-bounded organelle; intracellular organelle; nucleus; cell part; intracellular; intracellular part; membrane-bounded organelle; cell;	sequence-specific DNA binding RNA polymerase II transcription factor activity; transition metal ion binding; binding; ion binding; nucleic acid binding transcription factor activity; metal ion binding; cation binding; zinc ion binding; sequence-specific DNA binding transcription factor activity;				IPR001138;	Zn(2)-C6 fungal-type DNA-binding domain;
A0A064AVA6		0.565	Down	0.00137052	AO1008_04683	132.37	18.03	3.4	3	4	3	nuclear
A0A064AW97	RNA-binding protein	0.156	Down	1.55e-07	AO1008_03879	84.527	24.91	12.9	9	11	9	nuclear	RNA processing; cellular aromatic compound metabolic process; organic cyclic compound metabolic process; nitrogen compound metabolic process; primary metabolic process; cellular metabolic process; organic substance metabolic process; mRNA processing; RNA metabolic process; metabolic process; nucleic acid metabolic process; heterocycle metabolic process; nucleobase-containing compound metabolic pr…		organic cyclic compound binding; heterocyclic compound binding; nucleoside phosphate binding; binding; nucleic acid binding; nucleotide binding; small molecule binding;				IPR000504; IPR012677; IPR002483;	RNA recognition motif domain; Nucleotide-binding alpha-beta plait domain; PWI domain;	[A]	KOG2253	U1 snRNP complex, subunit SNU71 and related PWI-motif proteins
A0A064AWT7	Dehydrogenase kinase	0.65	Down	0.000239673	AO1008_06036	47.858	42.193	31.5	11	15	10	nuclear	phosphorylation; metabolic process; cellular metabolic process; phosphorus metabolic process; cellular process; phosphate-containing compound metabolic process;		catalytic activity; transferase activity; transferase activity, transferring phosphorus-containing groups;	K00898			IPR005467; IPR018955; IPR003594; IPR004358;	Histidine kinase domain; Branched-chain alpha-ketoacid dehydrogenase kinase/Pyruvate dehydrogenase kinase, N-terminal; Histidine kinase-like ATPase, C-terminal domain; Signal transduction histidine kinase-related protein, C-terminal;	[T]	KOG0787	Dehydrogenase kinase
A0A064AXP6	"Meltrin, fertilin"	0.553	Down	0.00347423	AO1008_05602	106.23	23.912	5.3	4	5	4	cytosol	cellular response to stress; cellular response to stimulus; cellular aromatic compound metabolic process; response to stress; DNA metabolic process; single-organism cellular process; nitrogen compound metabolic process; organic cyclic compound metabolic process; single-organism process; response to stimulus; primary metabolic process; cellular metabolic process; cellular response to DNA damage st…		organic cyclic compound binding; heterocyclic compound binding; endopeptidase activity; DNA binding; metalloendopeptidase activity; peptidase activity; catalytic activity; binding; nucleic acid binding; peptidase activity, acting on L-amino acid peptides; damaged DNA binding; hydrolase activity; metallopeptidase activity;				IPR024079; IPR017961; IPR001762; IPR034028; IPR001590;	Metallopeptidase, catalytic domain; DNA polymerase, Y-family, little finger domain; Disintegrin domain; Fungal reprolysin domain; Peptidase M12B, ADAM/reprolysin;	[O]	KOG3607	Meltrins, fertilins and related Zn-dependent metalloproteinases of the ADAMs family
A0A064AYL5	Tricarboxylate/dicarboxylate carrier protein	0.218	Down	1.02922e-05	AO1008_05117	33.493	29.464	30.7	9	13	9	mitochondria				K15100			IPR023395;	Mitochondrial carrier domain;	[C]	KOG0756	Mitochondrial tricarboxylate/dicarboxylate carrier proteins
A0A064AYR1	Putative transporter	0.476	Down	8.59873e-05	AO1008_07361	90.31	33.498	10.6	8	13	8	plasma membrane	transport; transmembrane transport; single-organism localization; single-organism cellular process; single-organism process; localization; cellular process; single-organism transport; establishment of localization;	intrinsic component of membrane; membrane; integral component of membrane; membrane part;	protein binding; binding;				IPR020846; IPR011990;	Major facilitator superfamily domain; Tetratricopeptide-like helical domain;	[R]	KOG0254	Predicted transporter (major facilitator superfamily)
A0A064B081	Nuclear pore complex	0.416	Down	0.000204338	AO1008_05607	92.655	23.646	9.3	5	6	5	nuclear	transport; localization; establishment of localization;	intracellular organelle; membrane; nuclear pore; nuclear envelope; pore complex; intracellular organelle part; organelle envelope; macromolecular complex; intrinsic component of membrane; endomembrane system; intracellular part; cell; integral component of membrane; organelle part; intracellular membrane-bounded organelle; organelle; nucleus; intracellular; cell part; membrane part; envelope; pro…		K14297	NUP98; nuclear pore complex protein Nup98-Nup96	aor03013 RNA transport - Aspergillus oryzae;	IPR007230;	Peptidase S59, nucleoporin;	[YU]	KOG0845	Nuclear pore complex, Nup98 component (sc Nup145/Nup100/Nup116)
A0A064B0D7	GTP-binding protein	0.642	Down	0.000502028	AO1008_07333	39.851	78.251	23.7	7	16	7	cytosol			nucleoside phosphate binding; nucleoside binding; ion binding; nucleotide binding; organic cyclic compound binding; heterocyclic compound binding; ribonucleoside binding; carbohydrate derivative binding; ribonucleotide binding; binding; purine ribonucleoside binding; anion binding; purine ribonucleotide binding; purine nucleoside binding; guanyl ribonucleotide binding; guanyl nucleotide binding; …	K06944			IPR031167; IPR031662; IPR027417; IPR012675; IPR005225; IPR012676; IPR006073; IPR004095;	OBG-type guanine nucleotide-binding (G) domain; GTP binding protein, second domain; P-loop containing nucleoside triphosphate hydrolase; Beta-grasp domain; Small GTP-binding protein domain; TGS-like; GTP binding domain; TGS;	[T]	KOG1486	GTP-binding protein DRG2 (ODN superfamily)
A0A064B2G7	"Chaperone binding protein, putative"	1.597	Up	1.93182e-07	AO1008_07259	22.361	43.75	49.3	11	31	11	nuclear			protein binding; binding;	K12274			IPR011990; IPR013026;	Tetratricopeptide-like helical domain; Tetratricopeptide repeat-containing domain;
A0A064B346		0.625	Down	0.0112652	AO1008_08858	125.19	55.963	14.4	14	17	14	nuclear
A0A064B3K5	Ypt/Rab-specific GTPase-activating protein	0.227	Down	0.000234877	AO1008_07385	92.824	48.175	9.5	7	14	7	nuclear				K20168			IPR000195; IPR021935;	Rab-GTPase-TBC domain; Domain of unknown function DUF3548;	[T]	KOG2197	Ypt/Rab-specific GTPase-activating protein GYP7 and related proteins
A0A064B488	"Bifunctional GTP cyclohydrolase II/3, 4-dihydroxy-2butanone-4-phosphate"	1.953	Up	1.62e-05	AO1008_07163	49.431	85.195	41.6	17	36	17	cytosol	vitamin biosynthetic process; heterocycle biosynthetic process; single-organism biosynthetic process; riboflavin biosynthetic process; small molecule metabolic process; single-organism cellular process; single-organism process; organic cyclic compound metabolic process; nitrogen compound metabolic process; biosynthetic process; flavin-containing compound biosynthetic process; organonitrogen compo…		hydrolase activity; hydrolase activity, acting on carbon-nitrogen (but not peptide) bonds, in cyclic amidines; cyclohydrolase activity; GTP cyclohydrolase II activity; GTP cyclohydrolase activity; catalytic activity; hydrolase activity, acting on carbon-nitrogen (but not peptide) bonds;				IPR022163; IPR032677;	GTP cyclohydrolase N-terminal; GTP cyclohydrolase II;	[H]	KOG1284	Bifunctional GTP cyclohydrolase II/3,4-dihydroxy-2butanone-4-phosphate synthase
A0A064B4Q8	Putative TBC domain protein	0.621	Down	9.21e-05	AO1008_09372	38.926	48.89	19.4	6	10	6	plasma membrane		intrinsic component of membrane; membrane; integral component of membrane; membrane part;					IPR006634;	TRAM/LAG1/CLN8 homology domain;	[TR]	KOG4561	Uncharacterized conserved protein, contains TBC domain
A0A064B633	FGF receptor activating protein	0.49	Down	6.41555e-07	AO1008_07548	103.7	22.979	8.4	7	11	7	plasma membrane							IPR005135;	Endonuclease/exonuclease/phosphatase;
A0A064B984	Nuclear pore complex subunit Nup85	0.385	Down	0.00637	AO1008_08820	109.18	41.507	10.8	9	10	9	nuclear
A0A064B9G9	conserved threonine rich protein [Aspergillus oryzae 3.042]	4.05	Up	0.034127	AO1008_09765	18.97	9.8303	16.7	3	4	3	extracellular
A0A064B9N0		0.366	Down	6.69e-05	AO1008_09009	77.074	14.024	10.6	6	14	6	nuclear							IPR024436;	Domain of unknown function DUF3824;
A0A064BCD2	Stress protein	0.131	Down	3.24896e-12	AO1008_10217	38.335	265.49	84.2	25	67	25	nuclear
A0A064BDF6	Gamma-glutamyltransferase	2.087	Up	1.63e-09	AO1008_10351	65.173	77.781	31	14	26	14	mitochondria	sulfur compound metabolic process; metabolic process; peptide metabolic process; cellular modified amino acid metabolic process; glutathione metabolic process; nitrogen compound metabolic process; cellular nitrogen compound metabolic process; cellular amide metabolic process; cellular process; cellular metabolic process; organonitrogen compound metabolic process; organic substance metabolic proce…		gamma-glutamyltransferase activity; transferase activity, transferring acyl groups; catalytic activity; transferase activity; transferase activity, transferring amino-acyl groups;	K00681	ggt; gamma-glutamyltranspeptidase / glutathione hydrolase [EC:2.3.2.2 3.4.19.13]	aor00430 Taurine and hypotaurine metabolism - Aspergillus oryzae; aor00460 Cyanoamino acid metabolism - Aspergillus oryzae; aor00480 Glutathione metabolism - Aspergillus oryzae; aor01100 Metabolic pathways - Aspergillus oryzae;	IPR029055;	Nucleophile aminohydrolases, N-terminal;	[E]	KOG2410	Gamma-glutamyltransferase
A0A064BE64	Cyclopropane fatty acid	2.126	Up	0.0249625	AO1008_00162	40.551	13.993	9.7	3	4	3	cytoskeleton	metabolic process; single-organism biosynthetic process; single-organism metabolic process; single-organism process; biosynthetic process; primary metabolic process; organic substance biosynthetic process; organic substance metabolic process; lipid metabolic process; lipid biosynthetic process;			K00574			IPR029063;	S-adenosyl-L-methionine-dependent methyltransferase;
A0A064BEA1	Genome maintenance protein	0.597	Down	0.0365888	AO1008_01134	30.524	18.815	22.1	5	9	5	mitochondria	cellular component organization; mitochondrial genome maintenance; cellular process; organelle organization; mitochondrion organization; cellular component organization or biogenesis;	intracellular organelle; mitochondrial matrix; mitochondrial chromosome; mitochondrial part; mitochondrial nucleoid; intracellular non-membrane-bounded organelle; cytoplasm; intracellular organelle part; intracellular part; cell; organelle part; mitochondrion; non-membrane-bounded organelle; organelle; membrane-enclosed lumen; intracellular membrane-bounded organelle; intracellular organelle lume…
A0A064BEZ1		0.182	Down	1.9e-06	AO1008_11159	17.803	17.706	28.7	4	10	4	nuclear									[S]	KOG4090	Uncharacterized conserved protein
A0A064BF05		4.148	Up	6.67966e-09	AO1008_10917	36.633	33.463	33.9	10	17	10	mitochondria			catalytic activity; oxidoreductase activity;				IPR000683; IPR016040;	Oxidoreductase, N-terminal; NAD(P)-binding domain;
A0A064BI95	Arylacetamide deacetylase	2.236	Up	1.55086e-08	AO1008_01283	37.226	86.224	38.9	9	27	9	cytosol	metabolic process;		hydrolase activity; catalytic activity;				IPR029058; IPR013094;	Alpha/Beta hydrolase fold; Alpha/beta hydrolase fold-3;	[V]	KOG1515	Arylacetamide deacetylase
A0A9L0	V-SNARE	0.479	Down	0.000179	Aosec9	45.523	18.33	12.8	5	6	5	nuclear			protein binding; binding;	K19950			IPR000727;	Target SNARE coiled-coil homology domain;	[U]	KOG3065	SNAP-25 (synaptosome-associated protein) component of SNARE complex
B1Q4X6	Endocytic adaptor protein	0.536	Down	1e-32	Aoend4	118.42	323.31	57.6	54	102	54	nuclear			cytoskeletal protein binding; binding; phospholipid binding; ion binding; actin binding; lipid binding; protein binding; anion binding;	K20040			IPR002558; IPR013809; IPR011417; IPR008942;	I/LWEQ domain; ENTH domain; AP180 N-terminal homology (ANTH) domain; ENTH/VHS;	[Z]	KOG0980	Actin-binding protein SLA2/Huntingtin-interacting protein Hip1
B5UB78	Aovps5 protein	0.459	Down	3.51604e-10	Aovps5	50.45	80.736	25.9	12	15	12	nuclear	intracellular transport; vesicle-mediated transport; single-organism process; organic substance transport; protein transport; single-organism intracellular transport; establishment of localization; cellular localization; endosomal transport; transport; establishment of protein localization; establishment of localization in cell; single-organism localization; retrograde transport, endosome to Golg…	membrane; retromer complex; membrane part; cell part; endomembrane system; macromolecular complex; protein complex; cell;	phosphatidylinositol phosphate binding; phosphatidylinositol-3-phosphate binding; binding; phospholipid binding; phosphatidylinositol binding; ion binding; lipid binding; anion binding;	K17917	SNX1_2; sorting nexin-1/2	aor04144 Endocytosis - Aspergillus oryzae;	IPR015404; IPR027267; IPR001683;	Sorting nexin Vps5-like, C-terminal; Arfaptin homology (AH) domain/BAR domain; Phox homologous domain;	[U]	KOG2273	Membrane coat complex Retromer, subunit VPS5/SNX1, Sorting nexins, and related PX domain-containing proteins
C7G4B6	Lysophospholipase	0.425	Down	0.0159	AoplaA	93.6	20.266	7.2	6	8	6	mitochondria	lipid catabolic process; organophosphate catabolic process; single-organism catabolic process; single-organism cellular process; single-organism process; cellular lipid metabolic process; primary metabolic process; cellular metabolic process; phosphate-containing compound metabolic process; organic substance metabolic process; phospholipid catabolic process; organic substance catabolic process; m…		phospholipase activity; hydrolase activity; lipase activity; catalytic activity; hydrolase activity, acting on ester bonds;	K16342	PLA2G4; cytosolic phospholipase A2 [EC:3.1.1.4]	aor00590 Arachidonic acid metabolism - Aspergillus oryzae; aor00591 Linoleic acid metabolism - Aspergillus oryzae; aor01110 Biosynthesis of secondary metabolites - Aspergillus oryzae; aor00565 Ether lipid metabolism - Aspergillus oryzae; aor00592 alpha-Linolenic acid metabolism - Aspergillus oryzae; aor00564 Glycerophospholipid metabolism - Aspergillus oryzae; aor01100 Metabolic pathways - Asperg…	IPR016035; IPR002642;	Acyl transferase/acyl hydrolase/lysophospholipase; Lysophospholipase, catalytic domain;	[I]	KOG1325	Lysophospholipase
D4QCA4	Cytochrome P450 monooxygenase	0.594	Down	2.58e-06	CYP5075B1	62.88	74.301	25.5	11	11	11	plasma membrane	single-organism process; metabolic process; oxidation-reduction process; single-organism metabolic process;		organic cyclic compound binding; heterocyclic compound binding; heme binding; iron ion binding; transition metal ion binding; catalytic activity; binding; ion binding; cation binding; metal ion binding; oxidoreductase activity, acting on paired donors, with incorporation or reduction of molecular oxygen; monooxygenase activity; tetrapyrrole binding; oxidoreductase activity;						[QI]	KOG0157	Cytochrome P450 CYP4/CYP19/CYP26 subfamilies
D9J2M5	Alpha-amylase	4.789	Up	1e-32	rhaD	54.672	323.31	41.2	19	86	19	extracellular	organic substance catabolic process; metabolic process; primary metabolic process; carbohydrate metabolic process; catabolic process; organic substance metabolic process; carbohydrate catabolic process;		alpha-amylase activity; amylase activity; catalytic activity; binding; hydrolase activity, acting on glycosyl bonds; ion binding; metal ion binding; cation binding; hydrolase activity, hydrolyzing O-glycosyl compounds; hydrolase activity; calcium ion binding;	K01176	AMY; alpha-amylase [EC:3.2.1.1]	aor00500 Starch and sucrose metabolism - Aspergillus oryzae; aor01100 Metabolic pathways - Aspergillus oryzae;	IPR013780; IPR015340; IPR017853; IPR006047; IPR013781;	Glycosyl hydrolase, all-beta; Alpha-amylase, domain of unknown function DUF1966, C-terminal; Glycoside hydrolase superfamily; Glycosyl hydrolase, family 13, catalytic domain; Glycoside hydrolase, catalytic domain;	[G]	KOG0471	Alpha-amylase
E3WCQ0	Putative biotin synthase AoBioB	0.518	Down	3.71538e-07	AobioB	42.286	79.675	34.8	10	14	10	mitochondria	vitamin biosynthetic process; organic acid biosynthetic process; biotin metabolic process; single-organism process; biosynthetic process; organonitrogen compound biosynthetic process; cellular metabolic process; sulfur compound biosynthetic process; organic substance metabolic process; metabolic process; vitamin metabolic process; heterocycle metabolic process; water-soluble vitamin biosynthetic …		2 iron, 2 sulfur cluster binding; radical SAM enzyme activity; catalytic activity; iron-sulfur cluster binding; binding; ion binding; biotin synthase activity; cation binding; metal ion binding; transferase activity, transferring sulfur-containing groups; 4 iron, 4 sulfur cluster binding; sulfurtransferase activity; transferase activity; metal cluster binding;	K01012	bioB; biotin synthase [EC:2.8.1.6]	aor00780 Biotin metabolism - Aspergillus oryzae; aor01100 Metabolic pathways - Aspergillus oryzae;	IPR010722; IPR013785; IPR006638; IPR007197;	Biotin and thiamin synthesis-associated domain; Aldolase-type TIM barrel; Elongator protein 3/MiaB/NifB; Radical SAM;	[H]	KOG2900	Biotin synthase
H9CNW4	NADH dehydrogenase subunit 2	1.663	Up	0.0176	AO090002_m0390	63.399	3.6876	1.8	1	2	1	mitochondria	phosphorylation; nucleoside metabolic process; purine nucleoside metabolic process; cellular aromatic compound metabolic process; purine ribonucleoside monophosphate metabolic process; ATP synthesis coupled electron transport; ribonucleotide metabolic process; nucleotide metabolic process; single-organism process; respiratory electron transport chain; cellular metabolic process; phosphate-contain…	organelle; intracellular membrane-bounded organelle; intracellular organelle; cell part; intracellular; cytoplasm; intracellular part; membrane-bounded organelle; cell; mitochondrion; cytoplasmic part;	NADH dehydrogenase (quinone) activity; oxidoreductase activity, acting on NAD(P)H; NADH dehydrogenase activity; catalytic activity; oxidoreductase activity, acting on NAD(P)H, quinone or similar compound as acceptor; NADH dehydrogenase (ubiquinone) activity; oxidoreductase activity;	K03879			IPR001750;	NADH:quinone oxidoreductase/Mrp antiporter, membrane subunit;	[C]	KOG4668	NADH dehydrogenase subunits 2, 5, and related proteins
I7ZKJ0	"LysR family regulatory protein, putative"	8.271	Up	0.028	Ao3042_11353	61.461	10.813	8.7	4	5	4	mitochondria			transferase activity, transferring acyl groups; transferase activity, transferring acyl groups other than amino-acyl groups; catalytic activity; transferase activity;				IPR023213;	Chloramphenicol acetyltransferase-like domain;
I7ZKV1	Ca2+/calmodulin-dependent protein kinase kinase	0.465	Down	3.12909e-09	Ao3042_01267	83.908	33.986	14.2	10	15	10	nuclear	phosphorylation; cellular protein metabolic process; primary metabolic process; cellular metabolic process; phosphate-containing compound metabolic process; organic substance metabolic process; metabolic process; protein phosphorylation; phosphorus metabolic process; cellular macromolecule metabolic process; cellular protein modification process; protein metabolic process; macromolecule metabolic…		ATP binding; nucleoside phosphate binding; phosphotransferase activity, alcohol group as acceptor; nucleoside binding; ion binding; nucleotide binding; protein kinase activity; organic cyclic compound binding; heterocyclic compound binding; ribonucleoside binding; carbohydrate derivative binding; kinase activity; ribonucleotide binding; catalytic activity; binding; purine ribonucleoside binding; …	K07359			IPR000719; IPR011009;	Protein kinase domain; Protein kinase-like domain;	[T]	KOG0585	Ca2+/calmodulin-dependent protein kinase kinase beta and related serine/threonine protein kinases
I7ZL71	Phosphoribosylamidoimidazole-succinocarboxamidesynthase	1.556	Up	6.28215e-09	Ao3042_00994	62.359	225.05	42.8	20	45	20	cytoskeleton	nucleotide biosynthetic process; cellular aromatic compound metabolic process; purine ribonucleoside monophosphate metabolic process; ribonucleotide metabolic process; nucleotide metabolic process; single-organism process; biosynthetic process; organonitrogen compound biosynthetic process; ribonucleoside monophosphate biosynthetic process; cellular metabolic process; IMP metabolic process; phosph…		ATP binding; nucleoside phosphate binding; nucleoside binding; ion binding; lyase activity; nucleotide binding; phosphoribosylaminoimidazole carboxylase activity; organic cyclic compound binding; heterocyclic compound binding; ribonucleoside binding; carbohydrate derivative binding; catalytic activity; ribonucleotide binding; carbon-carbon lyase activity; binding; purine ribonucleoside binding; c…	K11808	ADE2; phosphoribosylaminoimidazole carboxylase [EC:4.1.1.21]	aor01110 Biosynthesis of secondary metabolites - Aspergillus oryzae; aor00230 Purine metabolism - Aspergillus oryzae; aor01100 Metabolic pathways - Aspergillus oryzae;	IPR013815; IPR016185; IPR003135; IPR000031; IPR005875; IPR011761; IPR033747; IPR013816; IPR011054;	ATP-grasp fold, subdomain 1; Pre-ATP-grasp domain; ATP-grasp fold, ATP-dependent carboxylate-amine ligase-type; PurE domain; Phosphoribosylaminoimidazole carboxylase, ATPase subunit; ATP-grasp fold; Class I PurE; ATP-grasp fold, subdomain 2; Rudiment single hybrid motif;	[F]	KOG2835	Phosphoribosylamidoimidazole-succinocarboxamide synthase
I7ZL95	"Nucleotide excision repair factor NEF2, RAD23 component"	0.638	Down	6.22199e-06	Ao3042_01262	40.466	114.02	23.5	8	22	8	nuclear	cellular response to stress; proteolysis involved in cellular protein catabolic process; cellular protein catabolic process; cellular aromatic compound metabolic process; DNA metabolic process; nucleotide-excision repair; cellular protein metabolic process; single-organism process; response to stimulus; cellular metabolic process; proteasomal protein catabolic process; organic substance metabolic…	organelle; intracellular membrane-bounded organelle; intracellular organelle; nucleus; cell part; intracellular; intracellular part; membrane-bounded organelle; cell;	organic cyclic compound binding; heterocyclic compound binding; DNA binding; damaged DNA binding; protein binding; binding; nucleic acid binding;	K10839	RAD23; UV excision repair protein RAD23	aor03420 Nucleotide excision repair - Aspergillus oryzae; aor04141 Protein processing in endoplasmic reticulum - Aspergillus oryzae;	IPR006636; IPR015940; IPR029071; IPR000626; IPR015360; IPR009060;	Heat shock chaperonin-binding; Ubiquitin-associated domain; Ubiquitin-related domain; Ubiquitin domain; XPC-binding domain; UBA-like;	[L]	KOG0011	Nucleotide excision repair factor NEF2, RAD23 component
I7ZLH9		0.185	Down	0.0408	Ao3042_01133	114.76	19.118	7.9	8	8	8	nuclear
I7ZLL6	"Glutaredoxin Grx1, putative"	2.411	Up	1.85045e-08	Ao3042_01113	10.968	37.751	49	6	18	6	mitochondria	regulation of cellular process; homeostatic process; regulation of biological quality; regulation of biological process; cell redox homeostasis; single-organism cellular process; cellular homeostasis; single-organism process; cellular process; biological regulation;		electron carrier activity; protein disulfide oxidoreductase activity; oxidoreductase activity, acting on a sulfur group of donors; disulfide oxidoreductase activity; catalytic activity; oxidoreductase activity;	K03676			IPR002109; IPR011899; IPR014025; IPR012336;	Glutaredoxin; Glutaredoxin, eukaryotic/virial; Glutaredoxin subgroup; Thioredoxin-like fold;	[O]	KOG1752	Glutaredoxin and related proteins
I7ZLZ1	Proteasome component	0.481	Down	3.27e-08	Ao3042_00943	207.4	91.344	16.6	25	33	25	plasma membrane	cellular component biogenesis; proteasome assembly; cellular component organization; cellular macromolecular complex assembly; protein complex subunit organization; cellular component assembly; macromolecular complex assembly; protein complex biogenesis; protein complex assembly; cellular protein complex assembly; cellular component organization or biogenesis; macromolecular complex subunit organ…	proteasome complex; cell part; intracellular; macromolecular complex; intracellular part; protein complex; cell;	protein complex scaffold; protein binding; structural molecule activity; binding;	K11886			IPR011989; IPR016024;	Armadillo-like helical; Armadillo-type fold;	[S]	KOG0915	Uncharacterized conserved protein
I7ZM60	"2-keto-4-pentenoate hydratase/2-oxohepta-3-ene-1,7-dioic acid hydratase"	2.613	Up	1e-32	Ao3042_11175	62	139.4	40.9	19	48	19	cytosol	metabolic process;		catalytic activity;				IPR029058; IPR000073; IPR011234;	Alpha/Beta hydrolase fold; Alpha/beta hydrolase fold-1; Fumarylacetoacetase, C-terminal-related;	[R]	KOG1535	Predicted fumarylacetoacetate hydralase
I7ZM81	CBS and PB1 domain protein	0.333	Down	2.67342e-13	Ao3042_11047	72.249	115.86	26.6	15	22	15	mitochondria			organic cyclic compound binding; heterocyclic compound binding; nucleoside phosphate binding; binding; protein binding; adenyl nucleotide binding; nucleotide binding; purine nucleotide binding; small molecule binding;				IPR000270; IPR000644;	PB1 domain; CBS domain;
I7ZM96	Cytosine deaminase	0.299	Down	4.46068e-11	Ao3042_11183	52.379	25.868	20.9	10	12	10	cytoskeleton			hydrolase activity; catalytic activity; hydrolase activity, acting on carbon-nitrogen (but not peptide) bonds;				IPR032466; IPR006680; IPR011059;	Metal-dependent hydrolase; Amidohydrolase-related; Metal-dependent hydrolase, composite domain;	[FQ]	KOG3968	Atrazine chlorohydrolase/guanine deaminase
I7ZMJ8	Ribosomal protein	0.296	Down	0.00167773	Ao3042_10954	27.576	11.592	20.6	5	6	5	mitochondria	cellular protein metabolic process; biosynthetic process; primary metabolic process; cellular metabolic process; organic substance biosynthetic process; cellular biosynthetic process; organic substance metabolic process; metabolic process; cellular macromolecule biosynthetic process; cellular macromolecule metabolic process; gene expression; macromolecule metabolic process; protein metabolic proc…	ribosome; organelle; intracellular organelle; intracellular non-membrane-bounded organelle; cell part; intracellular; cytoplasm; macromolecular complex; intracellular part; cell; ribonucleoprotein complex; cytoplasmic part; non-membrane-bounded organelle;	organic cyclic compound binding; heterocyclic compound binding; RNA binding; binding; nucleic acid binding; structural molecule activity; structural constituent of ribosome; rRNA binding;	K02933	RP-L6; large subunit ribosomal protein L6	aor03010 Ribosome - Aspergillus oryzae;	IPR020040;	Ribosomal protein L6, alpha-beta domain;	[J]	KOG3254	Mitochondrial/chloroplast ribosomal protein L6
I7ZMK8	Ubiquitin activating E1 enzyme-like protein	0.462	Down	5.08706e-06	Ao3042_10813	78.844	57.473	21.3	13	17	13	cytosol	cellular catabolic process; metabolic process; autophagy; catabolic process; cellular metabolic process; cellular process;	intracellular part; cell; cell part; intracellular; cytoplasm;	small protein activating enzyme activity; ligase activity, forming carbon-sulfur bonds; catalytic activity; ligase activity;	K08337	ATG7; ubiquitin-like modifier-activating enzyme ATG7	aor04140 Autophagy - Aspergillus oryzae;	IPR000594; IPR016040; IPR032197;	THIF-type NAD/FAD binding fold; NAD(P)-binding domain; Ubiquitin-like modifier-activating enzyme Atg7, N-terminal;	[H]	KOG2337	Ubiquitin activating E1 enzyme-like protein
I7ZMN3	"Nuclear polyadenylated RNA-binding protein Nab2, putative"	0.151	Down	1.04645e-07	Ao3042_11029	54.244	12.238	7.2	4	9	4	extracellular									[A]	KOG3702	Nuclear polyadenylated RNA binding protein
I7ZMU8	Ribosomal protein S6 kinase	0.599	Down	0.00204533	Ao3042_11081	97.861	32.484	13.9	10	12	10	nuclear	phosphorylation; cellular protein metabolic process; primary metabolic process; cellular metabolic process; phosphate-containing compound metabolic process; organic substance metabolic process; metabolic process; protein phosphorylation; phosphorus metabolic process; cellular macromolecule metabolic process; cellular protein modification process; protein metabolic process; macromolecule metabolic…		ATP binding; nucleoside phosphate binding; phosphotransferase activity, alcohol group as acceptor; nucleoside binding; ion binding; protein binding; nucleotide binding; protein kinase activity; organic cyclic compound binding; heterocyclic compound binding; ribonucleoside binding; carbohydrate derivative binding; kinase activity; ribonucleotide binding; catalytic activity; binding; purine ribonuc…	K19800			IPR000719; IPR000008; IPR000961; IPR011009; IPR017892;	Protein kinase domain; C2 domain; AGC-kinase, C-terminal; Protein kinase-like domain; Protein kinase, C-terminal;	[RT]	KOG0598	Ribosomal protein S6 kinase and related proteins
I7ZNJ9	serine racemase [Aspergillus oryzae 3.042]	1.975	Up	0.0263464	Ao3042_10737	49.892	8.2032	7.3	4	5	4	cytosol							IPR026956; IPR029066; IPR001608;	D-serine dehydratase-like domain; PLP-binding barrel; Alanine racemase, N-terminal;
I7ZNS9	"Glutathione S-transferase family protein, putative"	1.552	Up	0.000489787	Ao3042_10498	28.833	38.058	22.6	5	10	5	mitochondria			protein binding; transferase activity; catalytic activity; binding;	K00799	GST; glutathione S-transferase [EC:2.5.1.18]	aor00480 Glutathione metabolism - Aspergillus oryzae;	IPR010987; IPR004046; IPR004045; IPR012336;	Glutathione S-transferase, C-terminal-like; Glutathione S-transferase, C-terminal; Glutathione S-transferase, N-terminal; Thioredoxin-like fold;
I7ZNV6	Fatty acid desaturase	2.429	Up	4.65946e-07	Ao3042_10364	58.832	33.073	17.6	7	14	7	plasma membrane	single-organism biosynthetic process; organic acid biosynthetic process; oxidation-reduction process; small molecule metabolic process; single-organism cellular process; single-organism process; cellular lipid metabolic process; biosynthetic process; fatty acid metabolic process; primary metabolic process; cellular metabolic process; fatty acid biosynthetic process; organic substance biosynthetic…	membrane; intracellular organelle; endoplasmic reticulum; cytoplasm; intrinsic component of membrane; endomembrane system; intracellular part; cell; integral component of membrane; intracellular membrane-bounded organelle; organelle; intracellular; cell part; membrane part; membrane-bounded organelle; cytoplasmic part;	iron ion binding; stearoyl-CoA 9-desaturase activity; acyl-CoA desaturase activity; oxidoreductase activity, acting on paired donors, with oxidation of a pair of donors resulting in the reduction of molecular oxygen to two molecules of water; ion binding; oxidoreductase activity, acting on paired donors, with incorporation or reduction of molecular oxygen; oxidoreductase activity; heterocyclic co…	K00507	SCD; stearoyl-CoA desaturase (Delta-9 desaturase) [EC:1.14.19.1]	aor01212 Fatty acid metabolism - Aspergillus oryzae; aor01040 Biosynthesis of unsaturated fatty acids - Aspergillus oryzae;	IPR005804; IPR001199; IPR012336;	Fatty acid desaturase domain; Cytochrome b5-like heme/steroid binding domain; Thioredoxin-like fold;	[I]	KOG1600	Fatty acid desaturase
I7ZP64	Reticulon-like protein	0.37	Down	1.76067e-08	Ao3042_10336	38.406	33.144	25.1	9	15	9	cytosol		intrinsic component of membrane; membrane; integral component of membrane; membrane part;					IPR003388;	Reticulon;	[U]	KOG1792	Reticulon
I7ZP87	Serine/threonine protein kinase	1.764	Up	5.578e-06	Ao3042_10347	107.77	29.225	10.8	6	8	6	cytosol	phosphorylation; cellular protein metabolic process; primary metabolic process; cellular metabolic process; phosphate-containing compound metabolic process; organic substance metabolic process; metabolic process; protein phosphorylation; phosphorus metabolic process; cellular macromolecule metabolic process; cellular protein modification process; protein metabolic process; macromolecule metabolic…		ATP binding; nucleoside phosphate binding; phosphotransferase activity, alcohol group as acceptor; nucleoside binding; ion binding; nucleotide binding; protein kinase activity; organic cyclic compound binding; heterocyclic compound binding; ribonucleoside binding; carbohydrate derivative binding; kinase activity; ribonucleotide binding; catalytic activity; binding; purine ribonucleoside binding; …				IPR000719; IPR011009;	Protein kinase domain; Protein kinase-like domain;	[T]	KOG1290	Serine/threonine protein kinase
I7ZPB1	Zn-dependent hydrolase	2.578	Up	5.93217e-05	Ao3042_10361	33.15	28.748	31.3	6	10	6	cytosol			hydrolase activity; catalytic activity;				IPR001279;	Metallo-beta-lactamase;
I7ZPS0	S-formylglutathione hydrolase	1.964	Up	5.12701e-13	Ao3042_10093	31.585	180.02	64.1	16	48	16	mitochondria	single-organism catabolic process; small molecule metabolic process; single-organism cellular process; cellular aldehyde metabolic process; single-organism process; small molecule catabolic process; cellular metabolic process; organic substance metabolic process; organic substance catabolic process; metabolic process; aldehyde catabolic process; single-organism metabolic process; cellular catabol…		hydrolase activity; thiolester hydrolase activity; catalytic activity; S-formylglutathione hydrolase activity; hydrolase activity, acting on ester bonds;	K01070	frmB; S-formylglutathione hydrolase [EC:3.1.2.12]	aor01200 Carbon metabolism - Aspergillus oryzae; aor00680 Methane metabolism - Aspergillus oryzae;	IPR029058;	Alpha/Beta hydrolase fold;
I7ZPS8		0.638	Down	1.23e-10	Ao3042_10100	35.332	143.78	41.6	12	35	12	nuclear			organic cyclic compound binding; heterocyclic compound binding; nucleoside phosphate binding; binding; nucleic acid binding; nucleotide binding; small molecule binding;				IPR000504; IPR012677;	RNA recognition motif domain; Nucleotide-binding alpha-beta plait domain;
I7ZPT7	ATP phosphoribosyltransferase	1.607	Up	3.30402e-12	Ao3042_10213	32.504	172.99	54.8	16	40	16	cytosol	cellular aromatic compound metabolic process; organic acid biosynthetic process; imidazole-containing compound metabolic process; single-organism process; biosynthetic process; histidine biosynthetic process; organonitrogen compound biosynthetic process; cellular metabolic process; organic substance metabolic process; metabolic process; cellular amino acid metabolic process; heterocycle metabolic…	intracellular part; cell; cell part; intracellular; cytoplasm;	magnesium ion binding; transferase activity, transferring pentosyl groups; ATP phosphoribosyltransferase activity; catalytic activity; binding; ion binding; metal ion binding; cation binding; transferase activity, transferring glycosyl groups; transferase activity;	K00765	hisG; ATP phosphoribosyltransferase [EC:2.4.2.17]	aor00340 Histidine metabolism - Aspergillus oryzae; aor01110 Biosynthesis of secondary metabolites - Aspergillus oryzae; aor01230 Biosynthesis of amino acids - Aspergillus oryzae; aor01100 Metabolic pathways - Aspergillus oryzae;	IPR015867; IPR013820; IPR013115; IPR011322;	Nitrogen regulatory protein PII/ATP phosphoribosyltransferase, C-terminal; ATP phosphoribosyltransferase, catalytic domain; Histidine biosynthesis HisG, C-terminal; Nitrogen regulatory PII-like, alpha/beta;	[E]	KOG2831	ATP phosphoribosyltransferase
I7ZQ21	Protein arginine N-methyltransferase PRMT1	2.972	Up	0.00356	Ao3042_09918	54.7	24.711	11.5	6	10	6	nuclear	cellular protein metabolic process; primary metabolic process; cellular metabolic process; methylation; organic substance metabolic process; metabolic process; protein alkylation; protein methylation; macromolecule methylation; cellular macromolecule metabolic process; cellular protein modification process; protein metabolic process; macromolecule metabolic process; protein modification process; …		transferase activity, transferring one-carbon groups; methyltransferase activity; catalytic activity; transferase activity;	K11436			IPR029063;	S-adenosyl-L-methionine-dependent methyltransferase;	[OKT]	KOG1499	Protein arginine N-methyltransferase PRMT1 and related enzymes
I7ZQ48		0.258	Down	1.01134e-10	Ao3042_10052	33.449	63.903	35.1	5	12	5	nuclear
I7ZQ66	Phosphoglycerate dehydrogenase	3.019	Up	8.82179e-05	Ao3042_10058	39.515	18.068	14.4	5	8	5	cytosol	single-organism process; metabolic process; oxidation-reduction process; single-organism metabolic process;		organic cyclic compound binding; heterocyclic compound binding; oxidoreductase activity, acting on CH-OH group of donors; oxidoreductase activity, acting on the CH-OH group of donors, NAD or NADP as acceptor; nucleoside phosphate binding; NAD binding; catalytic activity; binding; nucleotide binding; cofactor binding; small molecule binding; coenzyme binding; oxidoreductase activity;				IPR006140; IPR016040;	D-isomer specific 2-hydroxyacid dehydrogenase, NAD-binding domain; NAD(P)-binding domain;	[C]	KOG0069	Glyoxylate/hydroxypyruvate reductase (D-isomer-specific 2-hydroxy acid dehydrogenase superfamily)
I7ZQ72		0.444	Down	0.000143618	Ao3042_10019	116.8	54.543	12.1	10	15	10	nuclear			binding;	K15075			IPR011989; IPR016024; IPR024687;	Armadillo-like helical; Armadillo-type fold; MMS19, C-terminal;	[LK]	KOG1967	DNA repair/transcription protein Mms19
I7ZQ74	Bis(5'-nucleosyl)-tetraphosphatase	0.597	Down	0.0109083	Ao3042_09992	37.309	26.523	17.6	4	5	4	extracellular			ATP adenylyltransferase activity; nucleotidyltransferase activity; catalytic activity; transferase activity; transferase activity, transferring phosphorus-containing groups; adenylyltransferase activity;	K00988	APA1_2; ATP adenylyltransferase [EC:2.7.7.53]	aor00230 Purine metabolism - Aspergillus oryzae;	IPR011146; IPR019200;	HIT-like domain; ATP adenylyltransferase, C-terminal;
I7ZQQ8	Adenine deaminase/adenosine deaminase	4.283	Up	2.49592e-10	Ao3042_09550	64.996	48.59	20.5	13	24	13	extracellular			deaminase activity; catalytic activity;	K19572	CECR1; adenosine deaminase CECR1 [EC:3.5.4.4]	aor00230 Purine metabolism - Aspergillus oryzae; aor01100 Metabolic pathways - Aspergillus oryzae;	IPR001365; IPR032466;	Adenosine/AMP deaminase domain; Metal-dependent hydrolase;	[F]	KOG1097	Adenine deaminase/adenosine deaminase
I7ZQX4		0.453	Down	0.0314	Ao3042_09828	51.848	26.785	9.7	3	4	3	nuclear	transport; intracellular transport; establishment of localization in cell; localization; establishment of localization; cellular localization;			K15304			IPR000156; IPR011993;	Ran binding domain; PH domain-like;	[U]	KOG0864	Ran-binding protein RANBP1 and related RanBD domain proteins
I7ZR01	Phosphomethylpyrimidine kinase	1.702	Up	0.000503183	Ao3042_09838	47.742	45.19	27.5	12	15	12	cytoskeleton	vitamin biosynthetic process; cellular aromatic compound metabolic process; single-organism process; biosynthetic process; thiamine-containing compound biosynthetic process; organonitrogen compound biosynthetic process; thiamine metabolic process; cellular metabolic process; sulfur compound biosynthetic process; organic substance metabolic process; pyrimidine-containing compound biosynthetic proc…		kinase activity; catalytic activity; thiaminase activity; hydrolase activity; phosphomethylpyrimidine kinase activity; transferase activity; phosphotransferase activity, phosphate group as acceptor; hydrolase activity, acting on carbon-nitrogen (but not peptide) bonds; transferase activity, transferring phosphorus-containing groups;	K00877	THI20; hydroxymethylpyrimidine/phosphomethylpyrimidine kinase / thiaminase [EC:2.7.1.49 2.7.4.7 3.5.99.2]	aor00730 Thiamine metabolism - Aspergillus oryzae; aor01100 Metabolic pathways - Aspergillus oryzae;	IPR004399; IPR016084; IPR004305; IPR013749; IPR029056;	Hydroxymethylpyrimidine kinase/phosphomethylpyrimidine kinase; Haem oxygenase-like, multi-helical; Thiaminase-2/PQQC; Pyridoxamine kinase/Phosphomethylpyrimidine kinase; Ribokinase-like;	[HK]	KOG2598	Phosphomethylpyrimidine kinase
I7ZR73	Putative short chain-type dehydrogenase	1.838	Up	0.0240296	Ao3042_09674	26.199	18.957	29.3	4	4	4	cytosol			catalytic activity; oxidoreductase activity;				IPR016040;	NAD(P)-binding domain;	[R]	KOG1611	Predicted short chain-type dehydrogenase
I7ZRJ9	Globin	0.198	Down	1e-32	Ao3042_09667	45.963	65.594	25.2	15	39	15	extracellular	oxygen transport; transport; metabolic process; gas transport; single-organism localization; oxidation-reduction process; single-organism metabolic process; single-organism process; localization; establishment of localization; single-organism transport;		organic cyclic compound binding; heterocyclic compound binding; heme binding; iron ion binding; transition metal ion binding; catalytic activity; oxygen binding; binding; ion binding; metal ion binding; cation binding; tetrapyrrole binding; oxidoreductase activity;	K05916			IPR017927; IPR001433; IPR009050; IPR008333; IPR017938; IPR000971; IPR012292;	Ferredoxin reductase-type FAD-binding domain; Oxidoreductase FAD/NAD(P)-binding; Globin-like; Oxidoreductase, FAD-binding domain; Riboflavin synthase-like beta-barrel; Globin; Globin/Protoglobin;	[C]	KOG3378	Globins and related hemoproteins
I7ZRR8	Transcription elongation factor TAT-SF1	0.483	Down	0.0265	Ao3042_09333	52.718	22.067	13.7	6	7	6	nuclear			organic cyclic compound binding; heterocyclic compound binding; RNA binding; translation factor activity, nucleic acid binding; nucleoside phosphate binding; translation elongation factor activity; binding; nucleic acid binding; nucleotide binding; small molecule binding;	K13093			IPR000504; IPR012677;	RNA recognition motif domain; Nucleotide-binding alpha-beta plait domain;	[K]	KOG1548	Transcription elongation factor TAT-SF1
I7ZS59	Aldehyde dehydrogenase	1.912	Up	1.78856e-09	Ao3042_09016	53.967	317.02	60.2	26	111	26	cytosol	single-organism process; metabolic process; oxidation-reduction process; single-organism metabolic process;		oxidoreductase activity, acting on the aldehyde or oxo group of donors, NAD or NADP as acceptor; catalytic activity; oxidoreductase activity; oxidoreductase activity, acting on the aldehyde or oxo group of donors;	K00128	ALDH; aldehyde dehydrogenase (NAD+) [EC:1.2.1.3]	aor00340 Histidine metabolism - Aspergillus oryzae; aor00010 Glycolysis / Gluconeogenesis - Aspergillus oryzae; aor01110 Biosynthesis of secondary metabolites - Aspergillus oryzae; aor00561 Glycerolipid metabolism - Aspergillus oryzae; aor00310 Lysine degradation - Aspergillus oryzae; aor00620 Pyruvate metabolism - Aspergillus oryzae; aor00330 Arginine and proline metabolism - Aspergillus oryzae;…	IPR016161; IPR015590; IPR016162; IPR016163;	Aldehyde/histidinol dehydrogenase; Aldehyde dehydrogenase domain; Aldehyde dehydrogenase N-terminal domain; Aldehyde dehydrogenase, C-terminal;	[C]	KOG2450	Aldehyde dehydrogenase
I7ZSJ7	Cell cycle-associated protein	0.633	Down	0.00107868	Ao3042_08731	184.87	44.165	8.5	13	16	13	cytosol, nuclear			binding;				IPR011989; IPR019442; IPR016024;	Armadillo-like helical; Domain of unknown function DUF2428, death-receptor-like; Armadillo-type fold;	[D]	KOG1810	Cell cycle-associated protein
I7ZSM2	"Carboxylesterase, putative"	1.897	Up	0.00457781	Ao3042_08787	58.618	26.166	14.8	7	10	7	cytosol							IPR029058; IPR002018;	Alpha/Beta hydrolase fold; Carboxylesterase, type B;	[R]	KOG1516	Carboxylesterase and related proteins
I7ZSV9	alpha/beta fold family hydrolase [Aspergillus oryzae 3.042]	0.263	Down	4.91678e-05	Ao3042_08776	43.515	37.546	22.7	6	6	6	mitochondria							IPR029058; IPR000073;	Alpha/Beta hydrolase fold; Alpha/beta hydrolase fold-1;
I7ZT19	actin filament organization App1-like protein [Aspergillus oryzae 3.042]	0.318	Down	0.00524	Ao3042_09073	65.445	10.101	6.5	4	4	4	nuclear							IPR019236;	Domain of unknown function DUF2183;
I7ZT60		0.652	Down	0.000398874	Ao3042_08904	122.75	60.398	14.5	16	28	16	cytoskeleton			identical protein binding; protein binding, bridging; cytoskeletal protein binding; binding; ubiquitin binding; protein binding; binding, bridging; ubiquitin-like protein binding;	K20046			IPR001452; IPR007131; IPR013182;	SH3 domain; SLA1 homology domain 1, SHD1; Domain of unknown function DUF1720;
I7ZTG6	Dimethylglycine dehydrogenase	5.025	Up	3.24896e-12	Ao3042_08739	93.254	299.33	47.1	34	74	34	cytosol	alpha-amino acid catabolic process; single-organism process; glycine metabolic process; cellular metabolic process; organic substance metabolic process; glycine catabolic process; metabolic process; cellular amino acid metabolic process; cellular catabolic process; cellular process; single-organism catabolic process; oxidation-reduction process; small molecule metabolic process; single-organism c…	intracellular part; cell; cell part; intracellular; cytoplasm;	methyltransferase activity; catalytic activity; binding; transferase activity, transferring one-carbon groups; protein binding; aminomethyltransferase activity; transferase activity; oxidoreductase activity;				IPR032503; IPR006076; IPR029043; IPR006222; IPR013977; IPR027266; IPR023753;	FAD dependent oxidoreductase, central domain; FAD dependent oxidoreductase; Glycine cleavage T-protein/YgfZ, C-terminal domain; Glycine cleavage T-protein-like, N-terminal; Glycine cleavage T-protein, C-terminal barrel domain; GTP-binding protein TrmE/Glycine cleavage system T protein, domain 1; FAD/NAD(P)-binding domain;	[E]	KOG2844	Dimethylglycine dehydrogenase precursor
I7ZTL0		0.604	Down	0.000108482	Ao3042_08387	86.255	34.118	13.1	9	11	9	mitochondria
I7ZU24	Enoyl reductase domain of FAS1	5.767	Up	7.93e-09	Ao3042_08573	224.2	74.33	10	18	23	18	cytosol, nuclear	single-organism biosynthetic process; organic acid biosynthetic process; oxidation-reduction process; small molecule metabolic process; single-organism cellular process; single-organism process; cellular lipid metabolic process; biosynthetic process; fatty acid metabolic process; primary metabolic process; cellular metabolic process; fatty acid biosynthetic process; organic substance biosynthetic…	cell part; intracellular; cytoplasm; macromolecular complex; fatty acid synthase complex; intracellular part; cytosolic part; protein complex; cell; cytosol; cytoplasmic part;	oxidoreductase activity, acting on the CH-CH group of donors; transferase activity, transferring acyl groups; oxidoreductase activity, acting on the CH-CH group of donors, NAD or NADP as acceptor; catalytic activity; enoyl-[acyl-carrier-protein] reductase (NADH) activity; transferase activity; transferase activity, transferring acyl groups other than amino-acyl groups; oxidoreductase activity; fa…	K00668	FAS1; fatty acid synthase subunit beta, fungi type [EC:2.3.1.86]	aor01212 Fatty acid metabolism - Aspergillus oryzae; aor00061 Fatty acid biosynthesis - Aspergillus oryzae; aor01100 Metabolic pathways - Aspergillus oryzae;	IPR032088; IPR013785; IPR016035; IPR003965; IPR014043; IPR002539; IPR013565; IPR020801; IPR001227; IPR029069;	Starter unit:ACP transacylase; Aldolase-type TIM barrel; Acyl transferase/acyl hydrolase/lysophospholipase; Fatty acid synthase; Acyl transferase; MaoC-like domain; Domain of unknown function DUF1729; Polyketide synthase, acyl transferase domain; Acyl transferase domain; HotDog domain;
I7ZU76	Beta-galactosidase/beta-glucuronidase	0.541	Down	2.0877e-06	Ao3042_08525	95.989	83.199	23.7	18	25	18	cytosol	mannan metabolic process; cell wall macromolecule metabolic process; cellular carbohydrate catabolic process; cellular polysaccharide catabolic process; mannan catabolic process; polysaccharide catabolic process; carbohydrate metabolic process; primary metabolic process; cellular metabolic process; cellular polysaccharide metabolic process; organic substance metabolic process; carbohydrate catabo…		beta-mannosidase activity; hydrolase activity, hydrolyzing O-glycosyl compounds; hydrolase activity; mannosidase activity; catalytic activity; hydrolase activity, acting on glycosyl bonds;	K01192	E3.2.1.25; beta-mannosidase [EC:3.2.1.25]	aor00511 Other glycan degradation - Aspergillus oryzae;	IPR006102; IPR017853; IPR013781; IPR013812; IPR008979;	Glycoside hydrolase, family 2, immunoglobulin-like beta-sandwich; Glycoside hydrolase superfamily; Glycoside hydrolase, catalytic domain; Glycoside hydrolase, family 2/20, immunoglobulin-like beta-sandwich domain; Galactose-binding domain-like;
I7ZUA8	Glucoamylase	3.555	Up	3.24896e-12	Ao3042_08133	65.47	323.31	50.3	24	122	24	extracellular	organic substance catabolic process; metabolic process; polysaccharide metabolic process; macromolecule catabolic process; macromolecule metabolic process; polysaccharide catabolic process; primary metabolic process; carbohydrate metabolic process; catabolic process; organic substance metabolic process; carbohydrate catabolic process;		starch binding; polysaccharide binding; catalytic activity; binding; glucan 1,4-alpha-glucosidase activity; hydrolase activity, acting on glycosyl bonds; glucosidase activity; hydrolase activity, hydrolyzing O-glycosyl compounds; carbohydrate binding; hydrolase activity; pattern binding;	K01178	E3.2.1.3; glucoamylase [EC:3.2.1.3]	aor00500 Starch and sucrose metabolism - Aspergillus oryzae; aor01100 Metabolic pathways - Aspergillus oryzae;	IPR012341; IPR013783; IPR013784; IPR008928; IPR002044;	Six-hairpin glycosidase; Immunoglobulin-like fold; Carbohydrate-binding-like fold; Six-hairpin glycosidase-like; Carbohydrate binding module family 20;
I7ZUE0	glutathione S-transferase [Aspergillus oryzae 3.042]	0.523	Down	1.07e-08	Ao3042_08392	23.726	53.45	62.9	15	29	15	cytosol				K00799	GST; glutathione S-transferase [EC:2.5.1.18]	aor00480 Glutathione metabolism - Aspergillus oryzae;	IPR010987; IPR004046;	Glutathione S-transferase, C-terminal-like; Glutathione S-transferase, C-terminal;
I7ZV07	"Mitotic spindle checkpoint protein (Mad2B), putative"	0.628	Down	0.00423062	Ao3042_07902	32.203	11.831	18.1	5	7	5	mitochondria				K13728			IPR003511;	HORMA domain;	[D]	KOG3186	Mitotic spindle checkpoint protein
I7ZV44	Acyl-CoA dehydrogenase	1.512	Up	0.00790625	Ao3042_07844	57.516	97.659	32.8	12	16	12	mitochondria	single-organism process; metabolic process; oxidation-reduction process; single-organism metabolic process;		nucleoside phosphate binding; flavin adenine dinucleotide binding; ion binding; nucleotide binding; cofactor binding; oxidoreductase activity; oxidoreductase activity, acting on the CH-CH group of donors; heterocyclic compound binding; organic cyclic compound binding; heme binding; catalytic activity; binding; metal ion binding; cation binding; anion binding; acyl-CoA dehydrogenase activity; tetr…				IPR009100; IPR013786; IPR001199; IPR006091; IPR009075;	Acyl-CoA dehydrogenase/oxidase, N-terminal and middle domain; Acyl-CoA dehydrogenase/oxidase, N-terminal; Cytochrome b5-like heme/steroid binding domain; Acyl-CoA oxidase/dehydrogenase, central domain; Acyl-CoA dehydrogenase/oxidase C-terminal;	[EI]	KOG0141	Isovaleryl-CoA dehydrogenase
I7ZVC0	putative intracellular protease/amidase [Aspergillus oryzae 3.042]	4.791	Up	0.00763855	Ao3042_07829	25.423	11.432	13.4	3	5	3	extracellular							IPR002818; IPR029062;	DJ-1/PfpI; Class I glutamine amidotransferase-like;
I7ZVK9	Ribulose-phosphate 3-epimerase	1.593	Up	3.11551e-12	Ao3042_07968	27.42	48.154	32.1	5	33	5	cytosol	NADP metabolic process; pyridine nucleotide metabolic process; cellular aromatic compound metabolic process; nicotinamide nucleotide metabolic process; organophosphate catabolic process; nucleotide metabolic process; single-organism process; cellular metabolic process; pyridine-containing compound metabolic process; phosphate-containing compound metabolic process; organic substance metabolic proc…		isomerase activity; racemase and epimerase activity, acting on carbohydrates and derivatives; racemase and epimerase activity; catalytic activity; binding; ion binding; cation binding; metal ion binding; ribulose-phosphate 3-epimerase activity;	K01783	rpe; ribulose-phosphate 3-epimerase [EC:5.1.3.1]	aor00030 Pentose phosphate pathway - Aspergillus oryzae; aor01200 Carbon metabolism - Aspergillus oryzae; aor01110 Biosynthesis of secondary metabolites - Aspergillus oryzae; aor01130 Biosynthesis of antibiotics - Aspergillus oryzae; aor00040 Pentose and glucuronate interconversions - Aspergillus oryzae; aor01230 Biosynthesis of amino acids - Aspergillus oryzae; aor01100 Metabolic pathways - Aspe…	IPR013785; IPR011060;	Aldolase-type TIM barrel; Ribulose-phosphate binding barrel;	[G]	KOG3111	D-ribulose-5-phosphate 3-epimerase
I7ZVP3	Multidrug resistance-associated protein	0.13	Down	8.92244e-06	Ao3042_07700	131.62	21.457	8	9	13	9	plasma membrane	transport; transmembrane transport; single-organism localization; single-organism cellular process; single-organism process; localization; cellular process; single-organism transport; establishment of localization;	intrinsic component of membrane; membrane; integral component of membrane; membrane part;	nucleoside phosphate binding; primary active transmembrane transporter activity; hydrolase activity, acting on acid anhydrides; hydrolase activity; ATPase activity; organic cyclic compound binding; heterocyclic compound binding; pyrophosphatase activity; catalytic activity; ribonucleotide binding; ATPase activity, coupled to movement of substances; binding; purine ribonucleoside binding; hydrolas…				IPR003593; IPR003439; IPR027417; IPR011527;	AAA+ ATPase domain; ABC transporter-like; P-loop containing nucleoside triphosphate hydrolase; ABC transporter type 1, transmembrane domain;	[Q]	KOG0054	Multidrug resistance-associated protein/mitoxantrone resistance protein, ABC superfamily
I7ZVQ5	NAD-dependent aldehyde dehydrogenase	1.813	Up	5.00773e-11	Ao3042_07830	53.584	85.919	29.1	13	32	13	cytosol	single-organism process; metabolic process; oxidation-reduction process; single-organism metabolic process;		oxidoreductase activity, acting on the aldehyde or oxo group of donors, NAD or NADP as acceptor; catalytic activity; oxidoreductase activity; oxidoreductase activity, acting on the aldehyde or oxo group of donors;				IPR016161; IPR015590; IPR016162; IPR016163;	Aldehyde/histidinol dehydrogenase; Aldehyde dehydrogenase domain; Aldehyde dehydrogenase N-terminal domain; Aldehyde dehydrogenase, C-terminal;	[C]	KOG2450	Aldehyde dehydrogenase
I7ZVR3		2.234	Up	7.20649e-06	Ao3042_07869	28.466	197.6	30.9	5	13	5	plasma membrane		membrane; intracellular organelle; nuclear outer membrane-endoplasmic reticulum membrane network; endoplasmic reticulum; bounding membrane of organelle; organelle membrane; intracellular organelle part; cytoplasm; endomembrane system; intracellular part; cell; organelle part; intracellular membrane-bounded organelle; organelle; endoplasmic reticulum part; membrane part; intracellular; cell part; …
I7ZVU5	Protein putative to be involved in carbohydrate metabolism	0.529	Down	0.00234835	Ao3042_07725	100.22	38.55	8.9	5	10	5	nuclear			binding;	K17491			IPR011993; IPR016024; IPR006887;	PH domain-like; Armadillo-type fold; Domain of unknown function DUF625;	[G]	KOG2175	Protein predicted to be involved in carbohydrate metabolism
I7ZW88	Multidrug resistance-associated protein	0.524	Down	2.7e-09	Ao3042_07480	183.81	94.861	16.8	23	31	22	plasma membrane	transport; transmembrane transport; single-organism localization; single-organism cellular process; single-organism process; localization; cellular process; single-organism transport; establishment of localization;	intrinsic component of membrane; membrane; integral component of membrane; membrane part;	nucleoside phosphate binding; primary active transmembrane transporter activity; hydrolase activity, acting on acid anhydrides; hydrolase activity; ATPase activity; organic cyclic compound binding; heterocyclic compound binding; pyrophosphatase activity; catalytic activity; ribonucleotide binding; ATPase activity, coupled to movement of substances; binding; purine ribonucleoside binding; hydrolas…				IPR003593; IPR003439; IPR027417; IPR011527;	AAA+ ATPase domain; ABC transporter-like; P-loop containing nucleoside triphosphate hydrolase; ABC transporter type 1, transmembrane domain;	[Q]	KOG0054	Multidrug resistance-associated protein/mitoxantrone resistance protein, ABC superfamily
I7ZWB0	NAD dependent epimerase/dehydratase family protein [Aspergillus oryzae 3.042]	4.086	Up	0.00165461	Ao3042_07331	45.411	63.937	14.9	7	7	7	mitochondria	metabolic process; cellular metabolic process; cellular process;		cofactor binding; catalytic activity; binding; coenzyme binding;				IPR001509; IPR016040;	NAD-dependent epimerase/dehydratase; NAD(P)-binding domain;
I7ZWE3	Auxilin-like protein	0.41	Down	0.00572244	Ao3042_07412	98.199	30.445	9.4	7	8	7	nuclear			protein binding; binding;				IPR015940; IPR011990; IPR001623; IPR009060;	Ubiquitin-associated domain; Tetratricopeptide-like helical domain; DnaJ domain; UBA-like;	[R]	KOG0431	Auxilin-like protein and related proteins containing DnaJ domain
I7ZWH0	Dimethylallyl tryptophan synthase	4.077	Up	6.58e-13	Ao3042_07471	47.48	57.985	29.9	9	19	9	cytosol, nuclear	nitrogen compound metabolic process; metabolic process; alkaloid metabolic process; organonitrogen compound metabolic process; organic substance metabolic process;		transferase activity, transferring alkyl or aryl (other than methyl) groups; tryptophan dimethylallyltransferase activity; catalytic activity; transferase activity;
I7ZWL0	Conidial hydrophobin RodA/RolA	8.116	Up	1.38112e-07	Ao3042_07416	15.258	12.682	33.1	4	15	4	extracellular		fungal-type cell wall; cell wall; external encapsulating structure; cell; cell part; cell periphery;	structural constituent of cell wall; structural molecule activity;
I7ZWZ7		0.417	Down	0.00258792	Ao3042_07184	39.258	95.143	38.2	10	13	10	nuclear
I7ZX70		0.341	Down	1e-32	Ao3042_07090	31.049	95.676	45.6	16	39	16	nuclear				K13199			IPR019084; IPR006861;	Stm1, N-terminal; Hyaluronan/mRNA-binding protein;
I7ZXA2	"2-heptaprenyl-1,4-naphthoquinone methyltransferase, putative"	2.233	Up	3.66769e-07	Ao3042_07299	27.369	275	58.8	12	51	12	cytosol			transferase activity, transferring one-carbon groups; methyltransferase activity; catalytic activity; transferase activity;				IPR029063;	S-adenosyl-L-methionine-dependent methyltransferase;	[H]	KOG1270	Methyltransferases
I7ZXD9	U3 small nucleolar RNA-associated protein	0.44	Down	1.95138e-06	Ao3042_07243	198.5	65.096	11.1	15	18	15	plasma membrane			binding;	K14550	UTP10; U3 small nucleolar RNA-associated protein 10	aor03008 Ribosome biogenesis in eukaryotes - Aspergillus oryzae;	IPR011989; IPR012954; IPR016024;	Armadillo-like helical; BP28, C-terminal domain; Armadillo-type fold;	[S]	KOG1837	Uncharacterized conserved protein
I7ZXF2	Asp-tRNAAsn/Glu-tRNAGln amidotransferase A subunit	1.842	Up	1.14055e-11	Ao3042_07214	73.589	82.241	27.7	18	37	18	cytosol			ligase activity, forming carbon-nitrogen bonds; carbon-nitrogen ligase activity, with glutamine as amido-N-donor; transferase activity; catalytic activity; ligase activity;				IPR023631;	Amidase signature domain;	[J]	KOG1211	Amidases
I7ZY92		8.332	Up	0.00930175	Ao3042_06587	29.909	24.282	15.5	3	4	3	cytosol, nuclear
I7ZYN2	UDP-glucose pyrophosphorylase	1.78	Up	1e-32	Ao3042_06485	58.038	323.31	72.6	33	141	33	nuclear	cellular aromatic compound metabolic process; nucleotide metabolic process; small molecule metabolic process; single-organism cellular process; nitrogen compound metabolic process; single-organism process; organic cyclic compound metabolic process; primary metabolic process; cellular metabolic process; phosphate-containing compound metabolic process; organic substance metabolic process; metabolic…		nucleotidyltransferase activity; UTP:glucose-1-phosphate uridylyltransferase activity; catalytic activity; UTP-monosaccharide-1-phosphate uridylyltransferase activity; transferase activity; uridylyltransferase activity; transferase activity, transferring phosphorus-containing groups;	K00963	UGP2; UTP--glucose-1-phosphate uridylyltransferase [EC:2.7.7.9]	aor00052 Galactose metabolism - Aspergillus oryzae; aor01130 Biosynthesis of antibiotics - Aspergillus oryzae; aor00040 Pentose and glucuronate interconversions - Aspergillus oryzae; aor00500 Starch and sucrose metabolism - Aspergillus oryzae; aor00520 Amino sugar and nucleotide sugar metabolism - Aspergillus oryzae; aor01100 Metabolic pathways - Aspergillus oryzae;	IPR029044;	Nucleotide-diphospho-sugar transferases;	[G]	KOG2638	UDP-glucose pyrophosphorylase
I7ZYP1	"penicillin-binding protein, putative [Aspergillus oryzae 3.042]"	1.892	Up	0.0017	Ao3042_06502	57.207	38.942	12	5	6	5	mitochondria							IPR012338; IPR001466; IPR021860;	Beta-lactamase/transpeptidase-like; Beta-lactamase-related; Peptidase S12, Pab87-related, C-terminal;
I7ZYU8	5-formyltetrahydrofolate cyclo-ligase	1.559	Up	0.000424831	Ao3042_06218	26.963	21.216	32.4	5	7	5	mitochondria	cofactor biosynthetic process; pteridine-containing compound biosynthetic process; cellular aromatic compound metabolic process; organic acid biosynthetic process; cellular modified amino acid biosynthetic process; single-organism process; biosynthetic process; organonitrogen compound biosynthetic process; cellular metabolic process; organic substance metabolic process; metabolic process; cellula…		ATP binding; nucleoside phosphate binding; ligase activity; nucleoside binding; ion binding; cyclo-ligase activity; nucleotide binding; ligase activity, forming carbon-nitrogen bonds; organic cyclic compound binding; heterocyclic compound binding; ribonucleoside binding; carbohydrate derivative binding; catalytic activity; ribonucleotide binding; 5-formyltetrahydrofolate cyclo-ligase activity; bi…	K01934	MTHFS; 5-formyltetrahydrofolate cyclo-ligase [EC:6.3.3.2]	aor00670 One carbon pool by folate - Aspergillus oryzae; aor01100 Metabolic pathways - Aspergillus oryzae;	IPR024185;	5-formyltetrahydrofolate cyclo-ligase-like domain;	[H]	KOG3093	5-formyltetrahydrofolate cyclo-ligase
I7ZZ88	"Nucleosome-binding factor SPN, POB3 subunit"	2.843	Up	0.000213896	Ao3042_06299	63.901	72.244	19	11	16	11	nuclear		organelle; intracellular membrane-bounded organelle; intracellular organelle; nucleus; cell part; intracellular; intracellular part; membrane-bounded organelle; cell;	organic cyclic compound binding; heterocyclic compound binding; DNA binding; binding; nucleic acid binding;	K09272			IPR013719; IPR011993; IPR024954;	Domain of unknown function DUF1747; PH domain-like; SSRP1 domain;	[KLB]	KOG0526	Nucleosome-binding factor SPN, POB3 subunit
I7ZZ92	C6 finger domain protein	0.508	Down	0.0287725	Ao3042_06116	71.457	13.706	7.8	5	7	5	nuclear	regulation of cellular process; regulation of gene expression; regulation of transcription, DNA-templated; regulation of cellular biosynthetic process; regulation of primary metabolic process; regulation of macromolecule metabolic process; regulation of nucleobase-containing compound metabolic process; regulation of macromolecule biosynthetic process; regulation of cellular metabolic process; reg…	organelle; intracellular membrane-bounded organelle; intracellular organelle; nucleus; cell part; intracellular; intracellular part; membrane-bounded organelle; cell;	sequence-specific DNA binding RNA polymerase II transcription factor activity; transition metal ion binding; binding; nucleic acid binding transcription factor activity; ion binding; cation binding; metal ion binding; zinc ion binding; sequence-specific DNA binding transcription factor activity;				IPR001138; IPR007087;	Zn(2)-C6 fungal-type DNA-binding domain; Zinc finger, C2H2;
I7ZZA9	Putative mRNA-associated protein	0.303	Down	6.66746e-06	Ao3042_06090	57.416	52.22	23.6	10	14	10	mitochondria				K18749			IPR025768; IPR025761; IPR025609; IPR019050; IPR025762; IPR010920;	TFG box; FFD box; Lsm14 N-terminal; FDF domain; DFDF domain; LSM domain;	[U]	KOG1073	Uncharacterized mRNA-associated protein RAP55
I7ZZH8	Histidinol phosphatase	1.944	Up	4.81294e-05	Ao3042_06068	35.513	17.219	19.5	6	11	6	cytosol	cellular aromatic compound metabolic process; organic acid biosynthetic process; imidazole-containing compound metabolic process; single-organism process; biosynthetic process; histidine biosynthetic process; organonitrogen compound biosynthetic process; cellular metabolic process; organic substance metabolic process; metabolic process; cellular amino acid metabolic process; heterocycle metabolic…		histidinol-phosphatase activity; hydrolase activity; catalytic activity; phosphoric ester hydrolase activity; phosphatase activity; hydrolase activity, acting on ester bonds;	K04486	E3.1.3.15B; histidinol-phosphatase (PHP family) [EC:3.1.3.15]	aor00340 Histidine metabolism - Aspergillus oryzae; aor01110 Biosynthesis of secondary metabolites - Aspergillus oryzae; aor01230 Biosynthesis of amino acids - Aspergillus oryzae; aor01100 Metabolic pathways - Aspergillus oryzae;	IPR016195; IPR004013;	Polymerase/histidinol phosphatase-like; PHP domain;
I7ZZI5	Beta-xylanase	2.03	Up	2.23181e-07	Ao3042_06121	34.448	120.91	47.6	12	26	10	extracellular	cell wall macromolecule metabolic process; primary metabolic process; carbohydrate metabolic process; polysaccharide catabolic process; cellular metabolic process; xylan metabolic process; hemicellulose metabolic process; carbohydrate catabolic process; organic substance metabolic process; cell wall organization or biogenesis; xylan catabolic process; organic substance catabolic process; metaboli…		hydrolase activity, hydrolyzing O-glycosyl compounds; hydrolase activity; catalytic activity; hydrolase activity, acting on glycosyl bonds;	K01181			IPR001000; IPR017853; IPR013781;	Glycoside hydrolase family 10 domain; Glycoside hydrolase superfamily; Glycoside hydrolase, catalytic domain;
I7ZZV1		0.661	Down	0.00942533	Ao3042_05855	78.129	7.9061	6.8	4	6	4	nuclear			organic cyclic compound binding; heterocyclic compound binding; nucleoside phosphate binding; transition metal ion binding; binding; nucleic acid binding; ion binding; metal ion binding; cation binding; nucleotide binding; zinc ion binding; small molecule binding;				IPR000504; IPR012677; IPR000467; IPR001876;	RNA recognition motif domain; Nucleotide-binding alpha-beta plait domain; G-patch domain; Zinc finger, RanBP2-type;	[R]	KOG0154	RNA-binding protein RBM5 and related proteins, contain G-patch and RRM domains
I7ZZZ0		0.224	Down	5.65237e-12	Ao3042_05940	89.649	74.597	24.1	19	27	19	nuclear			cation binding; metal ion binding; zinc ion binding; transition metal ion binding; binding; ion binding;	K17987			IPR032350; IPR000433;	Next to BRCA1, central domain; Zinc finger, ZZ-type;	[R]	KOG4582	Uncharacterized conserved protein, contains ZZ-type Zn-finger
I7ZZZ6		0.364	Down	0.00106488	Ao3042_05962	60.384	18.943	13.7	6	7	6	nuclear			metal ion binding; cation binding; binding; ion binding;				IPR000571;	Zinc finger, CCCH-type;	[O]	KOG1039	Predicted E3 ubiquitin ligase
I8A033	Cystathionine beta-lyase	0.556	Down	4.15496e-06	Ao3042_05970	66.35	103.33	29.5	15	26	15	cytosol, nuclear			organic cyclic compound binding; heterocyclic compound binding; catalytic activity; binding; ion binding; lyase activity; anion binding; cofactor binding; pyridoxal phosphate binding;	K01739	metB; cystathionine gamma-synthase [EC:2.5.1.48]	aor00450 Selenocompound metabolism - Aspergillus oryzae; aor01110 Biosynthesis of secondary metabolites - Aspergillus oryzae; aor01130 Biosynthesis of antibiotics - Aspergillus oryzae; aor00920 Sulfur metabolism - Aspergillus oryzae; aor00270 Cysteine and methionine metabolism - Aspergillus oryzae; aor01230 Biosynthesis of amino acids - Aspergillus oryzae; aor01100 Metabolic pathways - Aspergillu…	IPR015424; IPR015422; IPR015421;	Pyridoxal phosphate-dependent transferase; Pyridoxal phosphate-dependent transferase, major region, subdomain 2; Pyridoxal phosphate-dependent transferase, major region, subdomain 1;	[E]	KOG0053	Cystathionine beta-lyases/cystathionine gamma-synthases
I8A0F0	"Translation initiation factor 4F, ribosome/mRNA-bridging subunit"	0.375	Down	1e-32	Ao3042_05628	155.45	236.52	36.5	51	91	51	nuclear			organic cyclic compound binding; heterocyclic compound binding; translation factor activity, nucleic acid binding; RNA binding; binding; nucleic acid binding; translation initiation factor activity; protein binding;	K03260	EIF4G; translation initiation factor 4G	aor03013 RNA transport - Aspergillus oryzae;	IPR022745; IPR016024; IPR003890; IPR016021;	Eukaryotic translation initiation factor 4G1, eIF4E-binding domain; Armadillo-type fold; MIF4G-like, type 3; MIF4G-like domain;	[J]	KOG0401	Translation initiation factor 4F, ribosome/mRNA-bridging subunit (eIF-4G)
I8A0L6	ATPase component of ABC transporter	0.504	Down	1.40531e-05	Ao3042_05506	83.008	89.504	18.9	12	16	12	nuclear			ATP binding; nucleoside phosphate binding; nucleoside binding; ion binding; hydrolase activity, acting on acid anhydrides; hydrolase activity; nucleotide binding; nucleoside-triphosphatase activity; ATPase activity; organic cyclic compound binding; heterocyclic compound binding; ribonucleoside binding; carbohydrate derivative binding; pyrophosphatase activity; catalytic activity; ribonucleotide b…	K06158			IPR003593; IPR032781; IPR003439; IPR027417;	AAA+ ATPase domain; ABC-transporter extension domain; ABC transporter-like; P-loop containing nucleoside triphosphate hydrolase;	[EJ]	KOG0062	ATPase component of ABC transporters with duplicated ATPase domains/Translation elongation factor EF-3b
I8A0S2		0.133	Down	8.25667e-05	Ao3042_05586	34.6	49.632	29.5	7	9	7	nuclear			organic cyclic compound binding; heterocyclic compound binding; nucleotide binding; nucleoside phosphate binding; binding; small molecule binding;				IPR012677;	Nucleotide-binding alpha-beta plait domain;
I8A0T6	Ribonucleoside-diphosphate reductase	1.838	Up	4.73679e-07	Ao3042_05448	95.646	151.2	37.6	29	62	29	cytosol, mitochondria	DNA replication; cellular aromatic compound metabolic process; oxidation-reduction process; DNA metabolic process; single-organism process; organic cyclic compound metabolic process; nitrogen compound metabolic process; biosynthetic process; primary metabolic process; organic substance biosynthetic process; cellular metabolic process; cellular biosynthetic process; organic substance metabolic pro…	catalytic complex; cell part; intracellular; oxidoreductase complex; ribonucleoside-diphosphate reductase complex; cytoplasm; macromolecular complex; intracellular part; cell; protein complex; cytoplasmic part;	ATP binding; oxidoreductase activity, acting on CH or CH2 groups; nucleoside phosphate binding; nucleoside binding; ion binding; ribonucleoside-diphosphate reductase activity, thioredoxin disulfide as acceptor; nucleotide binding; oxidoreductase activity; organic cyclic compound binding; heterocyclic compound binding; ribonucleoside binding; carbohydrate derivative binding; catalytic activity; ri…	K10807	RRM1; ribonucleoside-diphosphate reductase subunit M1 [EC:1.17.4.1]	aor00230 Purine metabolism - Aspergillus oryzae; aor00240 Pyrimidine metabolism - Aspergillus oryzae; aor00480 Glutathione metabolism - Aspergillus oryzae; aor01100 Metabolic pathways - Aspergillus oryzae;	IPR013509; IPR000788; IPR013346; IPR005144; IPR008926;	Ribonucleotide reductase large subunit, N-terminal; Ribonucleotide reductase large subunit, C-terminal; Ribonucleotide reductase, class I , alpha subunit; ATP-cone domain; Ribonucleotide reductase R1 subunit, N-terminal;	[F]	KOG1112	Ribonucleotide reductase, alpha subunit
I8A140	MICOS complex subunit MIC60	0.269	Down	3.24918e-12	Ao3042_05308	69.647	122.02	30.4	19	36	19	mitochondria		membrane; intracellular organelle; mitochondrial part; organelle membrane; organelle envelope; intracellular organelle part; cytoplasm; intrinsic component of membrane; intracellular part; cell; integral component of membrane; organelle part; mitochondrion; mitochondrial envelope; intracellular membrane-bounded organelle; organelle; membrane part; cell part; intracellular; envelope; organelle inn…		K17785					[M]	KOG1854	Mitochondrial inner membrane protein (mitofilin)
I8A146	2-hydroxychromene-2-carboxylate isomerase	0.35	Down	0.00532	Ao3042_05317	15.446	5.4712	12.1	1	2	1	cytosol			isomerase activity; catalytic activity;				IPR012336;	Thioredoxin-like fold;
I8A1N9	Nuclear pore complex protein An-Nup82	0.66	Down	6.24536e-09	Ao3042_05002	98.014	84.185	15.8	12	18	12	mitochondria				K18719
I8A1P3	Ankyrin repeat protein	0.458	Down	0.00778259	Ao3042_05021	90.378	17.747	7	6	6	6	cytosol, nuclear			protein binding; binding;	K18696	GDE1; glycerophosphodiester phosphodiesterase [EC:3.1.4.46]	aor00564 Glycerophospholipid metabolism - Aspergillus oryzae;	IPR020683; IPR004331;	Ankyrin repeat-containing domain; SPX domain;	[R]	KOG0504	FOG: Ankyrin repeat
I8A1P6	Transcription factor hoxa13	0.528	Down	0.0101	Ao3042_04996	99.26	52.089	9.2	7	10	7	nuclear			organic cyclic compound binding; heterocyclic compound binding; DNA binding; binding; nucleic acid binding;
I8A1V6	"Bifunctional GTP cyclohydrolase II/3, 4-dihydroxy-2butanone-4-phosphate synthase"	0.366	Down	0.0117	Ao3042_04722	44.257	7.8464	7	3	3	3	nuclear	vitamin biosynthetic process; heterocycle biosynthetic process; single-organism biosynthetic process; riboflavin biosynthetic process; small molecule metabolic process; single-organism cellular process; single-organism process; organic cyclic compound metabolic process; nitrogen compound metabolic process; biosynthetic process; flavin-containing compound biosynthetic process; organonitrogen compo…		hydrolase activity; hydrolase activity, acting on carbon-nitrogen (but not peptide) bonds, in cyclic amidines; cyclohydrolase activity; GTP cyclohydrolase II activity; GTP cyclohydrolase activity; catalytic activity; hydrolase activity, acting on carbon-nitrogen (but not peptide) bonds;	K01497	ribA; GTP cyclohydrolase II [EC:3.5.4.25]	aor00740 Riboflavin metabolism - Aspergillus oryzae; aor01110 Biosynthesis of secondary metabolites - Aspergillus oryzae; aor01100 Metabolic pathways - Aspergillus oryzae;	IPR032677;	GTP cyclohydrolase II;	[H]	KOG1284	Bifunctional GTP cyclohydrolase II/3,4-dihydroxy-2butanone-4-phosphate synthase
I8A1X3	NADH flavin oxidoreductase	3.766	Up	2.2695e-07	Ao3042_04824	47.098	29.115	20.3	9	13	9	cytosol	single-organism process; metabolic process; oxidation-reduction process; single-organism metabolic process;		nucleoside phosphate binding; ion binding; nucleotide binding; cofactor binding; oxidoreductase activity; heterocyclic compound binding; organic cyclic compound binding; carbohydrate derivative binding; ribonucleotide binding; catalytic activity; binding; anion binding; FMN binding; coenzyme binding; small molecule binding;				IPR001155; IPR013785;	NADH:flavin oxidoreductase/NADH oxidase, N-terminal; Aldolase-type TIM barrel;	[CR]	KOG0134	NADH:flavin oxidoreductase/12-oxophytodienoate reductase
I8A2Y9	Glycogen phosphorylase	0.285	Down	3.24896e-12	Ao3042_04763	99.695	323.31	45.5	35	72	35	cytosol	metabolic process; carbohydrate metabolic process; primary metabolic process; organic substance metabolic process;		organic cyclic compound binding; heterocyclic compound binding; transferase activity, transferring hexosyl groups; catalytic activity; binding; phosphorylase activity; ion binding; transferase activity, transferring glycosyl groups; anion binding; transferase activity; cofactor binding; glycogen phosphorylase activity; pyridoxal phosphate binding;	K00688	PYG; glycogen phosphorylase [EC:2.4.1.1]	aor01110 Biosynthesis of secondary metabolites - Aspergillus oryzae; aor00500 Starch and sucrose metabolism - Aspergillus oryzae; aor01100 Metabolic pathways - Aspergillus oryzae;			[G]	KOG2099	Glycogen phosphorylase
I8A341		1.972	Up	8.34941e-05	Ao3042_04848	34.857	24.63	23.3	6	6	5	cytosol							IPR029058; IPR000073;	Alpha/Beta hydrolase fold; Alpha/beta hydrolase fold-1;
I8A367	Hismacro and SEC14 domain-containing protein	0.604	Down	0.0400161	Ao3042_04163	37.717	35.527	27.4	8	11	8	cytosol, nuclear							IPR002589;	Macro domain;	[BK]	KOG2633	Hismacro and SEC14 domain-containing proteins
I8A3C0	ER-Golgi family vesicle-tethering protein	1.536	Up	0.00167115	Ao3042_04682	130.77	21.757	7.2	7	7	7	nuclear	cellular component organization; organelle membrane fusion; intracellular transport; single-organism process; Golgi vesicle transport; vesicle fusion with Golgi apparatus; protein transport; establishment of localization; establishment of localization in cell; single-organism localization; intracellular protein transport; single-organism membrane fusion; cellular protein localization; macromolecu…	intracellular organelle; membrane; bounding membrane of organelle; organelle membrane; intracellular organelle part; cytoplasm; Golgi membrane; endomembrane system; intracellular part; cell; organelle part; intracellular membrane-bounded organelle; organelle; intracellular; cell part; Golgi apparatus part; membrane-bounded organelle; Golgi apparatus; cytoplasmic part;	substrate-specific transporter activity; protein transporter activity; binding; transporter activity;	K20361			IPR006955; IPR011989; IPR016024; IPR006953;	Uso1/p115-like vesicle tethering protein, C-terminal; Armadillo-like helical; Armadillo-type fold; Vesicle tethering protein Uso1/P115-like , head domain;	[U]	KOG0946	ER-Golgi vesicle-tethering protein p115
I8A3C7	Spermidine synthase	1.683	Up	6.70619e-12	Ao3042_04703	38.725	52.861	28.5	9	37	9	mitochondria	polyamine metabolic process; cellular amine metabolic process; metabolic process; nitrogen compound metabolic process; cellular nitrogen compound metabolic process; cellular process; cellular metabolic process; amine metabolic process; cellular biogenic amine metabolic process; organonitrogen compound metabolic process; organic substance metabolic process;		transferase activity; catalytic activity;	K00797	speE; spermidine synthase [EC:2.5.1.16]	aor00410 beta-Alanine metabolism - Aspergillus oryzae; aor00270 Cysteine and methionine metabolism - Aspergillus oryzae; aor00330 Arginine and proline metabolism - Aspergillus oryzae; aor00480 Glutathione metabolism - Aspergillus oryzae; aor01100 Metabolic pathways - Aspergillus oryzae;	IPR029063; IPR030374;	S-adenosyl-L-methionine-dependent methyltransferase; Polyamine biosynthesis domain;	[E]	KOG1562	Spermidine synthase
I8A3Q6		0.593	Down	6.66184e-06	Ao3042_04459	23.68	51.536	40.6	7	15	7	cytoskeleton			transferase activity, transferring one-carbon groups; methyltransferase activity; catalytic activity; transferase activity;
I8A3T7	Very long-chain acyl-CoA synthetase/fatty acid transporter	0.482	Down	0.0186	Ao3042_04510	72.902	19.069	9.3	5	5	5	plasma membrane	metabolic process;		catalytic activity;				IPR025110; IPR000873;	AMP-binding enzyme C-terminal domain; AMP-dependent synthetase/ligase;	[I]	KOG1179	Very long-chain acyl-CoA synthetase/fatty acid transporter
I8A3U1	Manganese superoxide dismutase	0.624	Down	0.0143475	Ao3042_04506	33.532	23.651	4.4	1	3	1	mitochondria	superoxide metabolic process; metabolic process; reactive oxygen species metabolic process; oxidation-reduction process; single-organism metabolic process; single-organism process; cellular process; cellular metabolic process;		superoxide dismutase activity; catalytic activity; oxidoreductase activity, acting on superoxide radicals as acceptor; binding; ion binding; antioxidant activity; cation binding; metal ion binding; oxidoreductase activity;	K04564	SOD2; superoxide dismutase, Fe-Mn family [EC:1.15.1.1]	aor04146 Peroxisome - Aspergillus oryzae;	IPR019831; IPR019832;	Manganese/iron superoxide dismutase, N-terminal; Manganese/iron superoxide dismutase, C-terminal;	[P]	KOG0876	Manganese superoxide dismutase
I8A3X5	"Tropomyosin, putative"	0.356	Down	7.7951e-12	Ao3042_03880	12.705	53.911	67	10	20	10	nuclear				K17945
I8A452	"Membrane coat complex Retromer, subunit VPS5/SNX1"	0.324	Down	1e-32	Ao3042_03806	104.48	126.34	31.6	25	43	25	nuclear			lipid binding; anion binding; binding; phosphatidylinositol binding; phospholipid binding; ion binding;				IPR024555; IPR024554; IPR001683;	PX-associated domain; Domain of unknown function DUF3818, PX-associated; Phox homologous domain;	[U]	KOG2273	Membrane coat complex Retromer, subunit VPS5/SNX1, Sorting nexins, and related PX domain-containing proteins
I8A4E4	RNA-binding protein	0.363	Down	3.82138e-08	Ao3042_04238	78.159	53.933	15.2	10	15	10	nuclear				K18757			IPR011991; IPR006630;	Winged helix-turn-helix DNA-binding domain; RNA-binding protein Lupus La;	[OJ]	KOG2590	RNA-binding protein LARP/SRO9 and related La domain proteins
I8A4R4	Serine/threonine protein phosphatase	0.517	Down	0.000592133	Ao3042_04089	60.504	28.235	16.5	9	13	9	nuclear	cellular protein metabolic process; primary metabolic process; protein dephosphorylation; dephosphorylation; cellular metabolic process; phosphate-containing compound metabolic process; organic substance metabolic process; metabolic process; phosphorus metabolic process; cellular macromolecule metabolic process; cellular protein modification process; protein metabolic process; macromolecule metab…		phosphoric ester hydrolase activity; catalytic activity; protein serine/threonine phosphatase activity; phosphatase activity; binding; hydrolase activity, acting on ester bonds; ion binding; cation binding; metal ion binding; hydrolase activity; phosphoprotein phosphatase activity;	K19704	PTC1; protein phosphatase PTC1 [EC:3.1.3.16]	aor04011 MAPK signaling pathway - yeast - Aspergillus oryzae;	IPR001932;	PPM-type phosphatase domain;	[T]	KOG0698	Serine/threonine protein phosphatase
I8A4Y7	"1,4-benzoquinone reductase-like Trp repressor binding protein"	3.145	Up	1e-32	Ao3042_03481	21.813	133.05	61.6	10	48	10	cytosol	regulation of cellular process; regulation of macromolecule metabolic process; regulation of nucleobase-containing compound metabolic process; negative regulation of cellular process; negative regulation of cellular metabolic process; negative regulation of biological process; negative regulation of RNA metabolic process; negative regulation of transcription, DNA-templated; regulation of RNA bios…		oxidoreductase activity, acting on NAD(P)H; nucleoside phosphate binding; NAD(P)H dehydrogenase (quinone) activity; ion binding; nucleotide binding; cofactor binding; oxidoreductase activity, acting on NAD(P)H, quinone or similar compound as acceptor; oxidoreductase activity; heterocyclic compound binding; organic cyclic compound binding; carbohydrate derivative binding; ribonucleotide binding; c…	K03809	wrbA; NAD(P)H dehydrogenase (quinone) [EC:1.6.5.2]	aor00130 Ubiquinone and other terpenoid-quinone biosynthesis - Aspergillus oryzae; aor01110 Biosynthesis of secondary metabolites - Aspergillus oryzae;	IPR005025; IPR008254; IPR029039;	NADPH-dependent FMN reductase-like; Flavodoxin/nitric oxide synthase; Flavoprotein-like domain;	[R]	KOG3135	1,4-benzoquinone reductase-like; Trp repressor binding protein-like/protoplast-secreted protein
I8A539	NADH flavin oxidoreductase/12-oxophytodienoate reductase	3.879	Up	0.000249528	Ao3042_03757	40.926	75.638	41.1	12	17	12	mitochondria	single-organism process; metabolic process; oxidation-reduction process; single-organism metabolic process;		nucleoside phosphate binding; ion binding; nucleotide binding; cofactor binding; oxidoreductase activity; heterocyclic compound binding; organic cyclic compound binding; carbohydrate derivative binding; ribonucleotide binding; catalytic activity; binding; anion binding; FMN binding; coenzyme binding; small molecule binding;	K00354			IPR001155; IPR013785;	NADH:flavin oxidoreductase/NADH oxidase, N-terminal; Aldolase-type TIM barrel;	[CR]	KOG0134	NADH:flavin oxidoreductase/12-oxophytodienoate reductase
I8A569	Phosphoinositide phospholipase C	0.479	Down	5.49e-07	Ao3042_03795	71.331	48.728	18.9	14	18	14	nuclear	regulation of cellular process; single organism signaling; cellular response to stimulus; lipid catabolic process; intracellular signal transduction; single-organism catabolic process; single-organism cellular process; single-organism process; signaling; response to stimulus; primary metabolic process; organic substance metabolic process; organic substance catabolic process; metabolic process; si…		molecular transducer activity; phosphatidylinositol phospholipase C activity; catalytic activity; phosphoric ester hydrolase activity; phospholipase C activity; binding; hydrolase activity, acting on ester bonds; phospholipase activity; protein binding; hydrolase activity; phosphoric diester hydrolase activity; lipase activity; signal transducer activity;				IPR000909; IPR017946; IPR000008; IPR001711;	Phosphatidylinositol-specific phospholipase C, X domain; PLC-like phosphodiesterase, TIM beta/alpha-barrel domain; C2 domain; Phospholipase C, phosphatidylinositol-specific, Y domain;	[T]	KOG0169	Phosphoinositide-specific phospholipase C
I8A578	"Extracellular serine-rich protein, putative"	5.215	Up	1e-32	Ao3042_03802	85.922	191.28	26.8	13	41	13	extracellular
I8A5A5	SNF7 family protein	0.368	Down	9.85217e-05	Ao3042_03306	40.715	15.6	12.8	4	4	4	mitochondria	intracellular transport; single-organism process; organic substance transport; protein transport; single-organism intracellular transport; establishment of localization; cellular localization; transport; establishment of protein localization; establishment of localization in cell; single-organism localization; vacuolar transport; localization; macromolecule localization; protein localization; sin…			K15053	CHMP7; charged multivesicular body protein 7	aor04144 Endocytosis - Aspergillus oryzae;			[S]	KOG2911	Uncharacterized conserved protein
I8A5Q7	WD40 repeat protein	0.566	Down	0.0230387	Ao3042_03225	93.536	12.078	5.8	5	5	5	mitochondria			protein binding; binding;	K11274			IPR022100; IPR017986; IPR015943;	Minichromosome loss protein Mcl1, middle region; WD40-repeat-containing domain; WD40/YVTN repeat-like-containing domain;	[R]	KOG1274	WD40 repeat protein
I8A630	RuvB-like helicase	0.573	Down	2.95667e-10	Ao3042_03444	51.454	94.877	40.2	16	31	16	cytoskeleton			nucleoside phosphate binding; ATP-dependent helicase activity; hydrolase activity, acting on acid anhydrides; hydrolase activity; ATPase activity; organic cyclic compound binding; heterocyclic compound binding; pyrophosphatase activity; catalytic activity; ribonucleotide binding; binding; ATP-dependent DNA helicase activity; purine ribonucleoside binding; anion binding; adenyl ribonucleotide bind…	K11338			IPR003593; IPR010339; IPR027417;	AAA+ ATPase domain; TIP49, C-terminal; P-loop containing nucleoside triphosphate hydrolase;	[K]	KOG2680	DNA helicase TIP49, TBP-interacting protein
I8A699		4.18	Up	3.16e-09	Ao3042_02852	30.843	68.162	37.3	6	12	6	extracellular		viral capsid; virion part; virion;					IPR004302;	Chitin-binding protein, N-terminal;
I8A6C5		0.651	Down	0.0135188	Ao3042_03274	151.55	95.971	10.1	12	15	12	cytosol
I8A6F7		1.649	Up	0.00038998	Ao3042_02824	57.363	50.887	23.3	8	15	8	mitochondria	GPI anchor biosynthetic process; glycolipid biosynthetic process; liposaccharide metabolic process; glycerolipid metabolic process; phosphatidylinositol biosynthetic process; membrane lipid metabolic process; phospholipid biosynthetic process; cellular protein metabolic process; single-organism process; biosynthetic process; cellular lipid metabolic process; cellular metabolic process; lipoprotei…	membrane; intracellular organelle; endoplasmic reticulum; nuclear outer membrane-endoplasmic reticulum membrane network; bounding membrane of organelle; organelle membrane; cytoplasm; intracellular organelle part; endomembrane system; intracellular part; cell; organelle part; intracellular membrane-bounded organelle; organelle; endoplasmic reticulum part; intracellular; cell part; membrane part; …
I8A6H9		0.46	Down	8.79113e-07	Ao3042_03285	45.695	38.711	29.2	10	16	10	cytosol	single-organism process; metabolic process; oxidation-reduction process; single-organism metabolic process;		catalytic activity; oxidoreductase activity;				IPR005097; IPR016040;	Saccharopine dehydrogenase, NADP binding domain; NAD(P)-binding domain;	[S]	KOG2733	Uncharacterized membrane protein
I8A6I9	E3 ubiquitin-protein ligase	0.539	Down	0.0233643	Ao3042_03168	92.395	88.949	23.3	19	27	19	nuclear			ubiquitin-like protein transferase activity; catalytic activity; binding; ligase activity; ubiquitin-protein transferase activity; protein binding; transferase activity;	K10591	NEDD4; E3 ubiquitin-protein ligase NEDD4 [EC:2.3.2.26]	aor04011 MAPK signaling pathway - yeast - Aspergillus oryzae; aor04144 Endocytosis - Aspergillus oryzae; aor04120 Ubiquitin mediated proteolysis - Aspergillus oryzae;	IPR001202; IPR000569; IPR000008;	WW domain; HECT domain; C2 domain;	[O]	KOG0940	Ubiquitin protein ligase RSP5/NEDD4
I8A6J0	O-methyltransferase	5.922	Up	4.88498e-15	Ao3042_03107	46.13	108.17	38.9	14	29	14	cytosol	single-organism process; metabolic process; oxidation-reduction process; single-organism metabolic process;		nucleoside phosphate binding; methyltransferase activity; flavin adenine dinucleotide binding; ion binding; transferase activity, transferring one-carbon groups; nucleotide binding; cofactor binding; oxidoreductase activity; FAD binding; heterocyclic compound binding; organic cyclic compound binding; catalytic activity; binding; anion binding; transferase activity; small molecule binding; coenzym…				IPR002938; IPR023753;	FAD-binding domain; FAD/NAD(P)-binding domain;
I8A6K7	Protein interacting with poly(A)-binding protein	0.29	Down	1.89915e-11	Ao3042_03151	104.21	86.906	22.1	17	23	17	nuclear							IPR009604;	LsmAD domain;	[A]	KOG2375	Protein interacting with poly(A)-binding protein
I8A6L0	"Global transcriptional regulator, cell division control protein"	2.909	Up	0.0022	Ao3042_03258	115.31	40.572	10.2	8	10	8	cytosol	single-organism cellular process; single-organism process; cell division; cellular process;						IPR000994; IPR029149; IPR013719; IPR029148; IPR013953;	Peptidase M24; Creatinase/Aminopeptidase P/Spt16, N-terminal; Domain of unknown function DUF1747; FACT complex subunit Spt16, N-terminal lobe domain; FACT complex subunit Spt16p/Cdc68p;	[E]	KOG1189	Global transcriptional regulator, cell division control protein
I8A6Q4	4-aminobutyrate aminotransferase	1.512	Up	1e-32	Ao3042_02814	54.472	183.08	54.9	24	79	24	mitochondria	small molecule metabolic process; single-organism cellular process; nitrogen compound metabolic process; single-organism process; primary metabolic process; cellular metabolic process; organic substance metabolic process; metabolic process; cellular amino acid metabolic process; gamma-aminobutyric acid metabolic process; single-organism metabolic process; carboxylic acid metabolic process; monoca…		organic cyclic compound binding; heterocyclic compound binding; transferase activity, transferring nitrogenous groups; catalytic activity; binding; ion binding; anion binding; transaminase activity; transferase activity; cofactor binding; 4-aminobutyrate transaminase activity; pyridoxal phosphate binding;	K13524	ABAT; 4-aminobutyrate aminotransferase / (S)-3-amino-2-methylpropionate transaminase [EC:2.6.1.19 2.6.1.22]	aor00280 Valine, leucine and isoleucine degradation - Aspergillus oryzae; aor00410 beta-Alanine metabolism - Aspergillus oryzae; aor00650 Butanoate metabolism - Aspergillus oryzae; aor00640 Propanoate metabolism - Aspergillus oryzae; aor00250 Alanine, aspartate and glutamate metabolism - Aspergillus oryzae; aor01100 Metabolic pathways - Aspergillus oryzae;	IPR015424; IPR015422; IPR015421;	Pyridoxal phosphate-dependent transferase; Pyridoxal phosphate-dependent transferase, major region, subdomain 2; Pyridoxal phosphate-dependent transferase, major region, subdomain 1;	[E]	KOG1405	4-aminobutyrate aminotransferase
I8A6S6	Pyruvate dehydrogenase E1 component subunit alpha	1.632	Up	3.2494e-12	Ao3042_03193	45.435	228.13	54.6	23	68	23	mitochondria	cofactor biosynthetic process; glycolytic process; single-organism process; biosynthetic process; cellular metabolic process; thioester biosynthetic process; sulfur compound biosynthetic process; organic substance metabolic process; acetyl-CoA biosynthetic process; metabolic process; pyruvate metabolic process; generation of precursor metabolites and energy; monocarboxylic acid metabolic process;…	intracellular membrane-bounded organelle; organelle; intracellular organelle; cell part; intracellular; intracellular part; membrane-bounded organelle; cell;	pyruvate dehydrogenase activity; pyruvate dehydrogenase (acetyl-transferring) activity; catalytic activity; oxidoreductase activity, acting on the aldehyde or oxo group of donors, disulfide as acceptor; oxidoreductase activity; oxidoreductase activity, acting on the aldehyde or oxo group of donors;	K00161	PDHA; pyruvate dehydrogenase E1 component alpha subunit [EC:1.2.4.1]	aor01200 Carbon metabolism - Aspergillus oryzae; aor00010 Glycolysis / Gluconeogenesis - Aspergillus oryzae; aor01110 Biosynthesis of secondary metabolites - Aspergillus oryzae; aor01130 Biosynthesis of antibiotics - Aspergillus oryzae; aor00620 Pyruvate metabolism - Aspergillus oryzae; aor00020 Citrate cycle (TCA cycle) - Aspergillus oryzae; aor01100 Metabolic pathways - Aspergillus oryzae;	IPR001017; IPR029061;	Dehydrogenase, E1 component; Thiamin diphosphate-binding fold;	[C]	KOG0225	Pyruvate dehydrogenase E1, alpha subunit
I8A6V1	peroxidase/oxygenase [Aspergillus oryzae 3.042]	1.522	Up	8.81189e-10	Ao3042_02647	120.91	133.15	25.4	24	35	24	cytosol, nuclear	metabolic process; response to stress; oxidation-reduction process; single-organism metabolic process; response to oxidative stress; single-organism process; response to stimulus;		organic cyclic compound binding; heterocyclic compound binding; heme binding; iron ion binding; transition metal ion binding; catalytic activity; binding; ion binding; antioxidant activity; cation binding; metal ion binding; oxidoreductase activity, acting on paired donors, with incorporation or reduction of molecular oxygen; peroxidase activity; tetrapyrrole binding; oxidoreductase activity, act…						[R]	KOG2408	Peroxidase/oxygenase
I8A6X0		2.84	Up	0.00614411	Ao3042_02631	91.654	33.573	9	7	7	7	mitochondria			protein binding; binding;	K14546	UTP5; U3 small nucleolar RNA-associated protein 5	aor03008 Ribosome biogenesis in eukaryotes - Aspergillus oryzae;	IPR017986; IPR015943; IPR007148;	WD40-repeat-containing domain; WD40/YVTN repeat-like-containing domain; Small-subunit processome, Utp12;	[R]	KOG4547	WD40 repeat-containing protein
I8A753	"Helicase-like transcription factor HLTF/DNA helicase RAD5, DEAD-box superfamily"	3.962	Up	0.0492278	Ao3042_02801	86.956	2.8192	2.1	2	3	2	nuclear			nucleoside phosphate binding; hydrolase activity, acting on acid anhydrides; hydrolase activity; protein binding; heterocyclic compound binding; organic cyclic compound binding; pyrophosphatase activity; catalytic activity; ribonucleotide binding; binding; purine ribonucleoside binding; cation binding; anion binding; adenyl ribonucleotide binding; adenyl nucleotide binding; hydrolase activity, ac…	K15711			IPR001841; IPR013083; IPR027417; IPR014001; IPR001650; IPR000330;	Zinc finger, RING-type; Zinc finger, RING/FYVE/PHD-type; P-loop containing nucleoside triphosphate hydrolase; Helicase superfamily 1/2, ATP-binding domain; Helicase, C-terminal; SNF2-related, N-terminal domain;	[KL]	KOG1001	Helicase-like transcription factor HLTF/DNA helicase RAD5, DEAD-box superfamily
I8A783	Multidrug resistance-associated protein	2.436	Up	0.0145	Ao3042_03114	160.91	10.82	3.1	4	4	4	plasma membrane	transport; transmembrane transport; single-organism localization; single-organism cellular process; single-organism process; localization; cellular process; single-organism transport; establishment of localization;	intrinsic component of membrane; membrane; integral component of membrane; membrane part;	nucleoside phosphate binding; primary active transmembrane transporter activity; hydrolase activity, acting on acid anhydrides; hydrolase activity; ATPase activity; organic cyclic compound binding; heterocyclic compound binding; pyrophosphatase activity; catalytic activity; ribonucleotide binding; ATPase activity, coupled to movement of substances; binding; purine ribonucleoside binding; hydrolas…				IPR003593; IPR003439; IPR011527; IPR027417;	AAA+ ATPase domain; ABC transporter-like; ABC transporter type 1, transmembrane domain; P-loop containing nucleoside triphosphate hydrolase;	[Q]	KOG0054	Multidrug resistance-associated protein/mitoxantrone resistance protein, ABC superfamily
I8A7R3	Pyruvate decarboxylase	1.807	Up	8.28607e-08	Ao3042_02310	64.299	197.95	47.2	20	46	20	cytosol			magnesium ion binding; vitamin binding; ion binding; lyase activity; cofactor binding; sulfur compound binding; thiamine pyrophosphate binding; heterocyclic compound binding; organic cyclic compound binding; catalytic activity; carbon-carbon lyase activity; binding; carboxy-lyase activity; cation binding; metal ion binding; anion binding; coenzyme binding; small molecule binding;	K01568	PDC; pyruvate decarboxylase [EC:4.1.1.1]	aor00010 Glycolysis / Gluconeogenesis - Aspergillus oryzae; aor01110 Biosynthesis of secondary metabolites - Aspergillus oryzae; aor01130 Biosynthesis of antibiotics - Aspergillus oryzae; aor01100 Metabolic pathways - Aspergillus oryzae;	IPR012000; IPR029035; IPR029061; IPR012001; IPR011766;	Thiamine pyrophosphate enzyme, central domain; DHS-like NAD/FAD-binding domain; Thiamin diphosphate-binding fold; Thiamine pyrophosphate enzyme, N-terminal TPP-binding domain; Thiamine pyrophosphate enzyme, C-terminal TPP-binding;	[EH]	KOG1184	Thiamine pyrophosphate-requiring enzyme
I8A7V7	"Voltage-gated shaker-like K+ channel, subunit beta/KCNAB"	2.432	Up	3.25251e-12	Ao3042_02685	39.105	142.01	62.1	20	41	16	cytoskeleton							IPR023210;	NADP-dependent oxidoreductase domain;	[C]	KOG1575	Voltage-gated shaker-like K+ channel, subunit beta/KCNAB
I8A820	Cytochrome protein	0.583	Down	0.032	Ao3042_02209	58.221	55.104	25.3	10	12	10	mitochondria	single-organism process; metabolic process; oxidation-reduction process; single-organism metabolic process;		organic cyclic compound binding; heterocyclic compound binding; heme binding; iron ion binding; transition metal ion binding; catalytic activity; binding; ion binding; cation binding; metal ion binding; oxidoreductase activity, acting on paired donors, with incorporation or reduction of molecular oxygen; monooxygenase activity; tetrapyrrole binding; oxidoreductase activity;						[Q]	KOG0158	Cytochrome P450 CYP3/CYP5/CYP6/CYP9 subfamilies
I8A833		5.099	Up	6.1981e-05	Ao3042_02552	58.037	79.359	32.9	11	20	11	cytosol			transferase activity, transferring one-carbon groups; O-methyltransferase activity; methyltransferase activity; catalytic activity; transferase activity;				IPR011991; IPR029063; IPR001077;	Winged helix-turn-helix DNA-binding domain; S-adenosyl-L-methionine-dependent methyltransferase; O-methyltransferase, family 2;	[R]	KOG3178	Hydroxyindole-O-methyltransferase and related SAM-dependent methyltransferases
I8A851	cytochrome protein [Aspergillus oryzae 3.042]	6.633	Up	3.3948e-06	Ao3042_02556	59.999	28.931	14.8	7	11	7	cytosol	single-organism process; metabolic process; oxidation-reduction process; single-organism metabolic process;		organic cyclic compound binding; heterocyclic compound binding; heme binding; iron ion binding; transition metal ion binding; catalytic activity; binding; ion binding; cation binding; metal ion binding; oxidoreductase activity, acting on paired donors, with incorporation or reduction of molecular oxygen; monooxygenase activity; tetrapyrrole binding; oxidoreductase activity;				IPR023753;	FAD/NAD(P)-binding domain;	[Q]	KOG0156	Cytochrome P450 CYP2 subfamily
I8A861	glutathione S-transferase [Aspergillus oryzae 3.042]	7.018	Up	7.53928e-05	Ao3042_02551	26.885	17.299	23.4	6	9	6	cytoskeleton			protein binding; binding;	K00799	GST; glutathione S-transferase [EC:2.5.1.18]	aor00480 Glutathione metabolism - Aspergillus oryzae;	IPR004046; IPR010987; IPR012336; IPR004045;	Glutathione S-transferase, C-terminal; Glutathione S-transferase, C-terminal-like; Thioredoxin-like fold; Glutathione S-transferase, N-terminal;
I8A869	Nuclease S1	5.055	Up	2.55149e-07	Ao3042_02519	31.133	36.668	22.6	6	10	6	extracellular	cellular macromolecule catabolic process; DNA catabolic process; cellular aromatic compound metabolic process; DNA metabolic process; organic cyclic compound metabolic process; nitrogen compound metabolic process; primary metabolic process; cellular metabolic process; organic substance metabolic process; organic substance catabolic process; cellular nitrogen compound catabolic process; aromatic c…		organic cyclic compound binding; heterocyclic compound binding; catalytic activity; binding; nucleic acid binding; hydrolase activity, acting on ester bonds; nuclease activity; hydrolase activity; endonuclease activity;				IPR008947;	Phospholipase C/P1 nuclease domain;
I8A8A6		0.303	Down	0.041169	Ao3042_02484	69.859	15.937	12.9	6	7	6	nuclear							IPR028115;	Domain of unknown function DUF4484;	[S]	KOG4704	Uncharacterized conserved protein
I8A8I2	Synaptobrevin/VAMP-like protein	0.423	Down	0.000988185	Ao3042_02355	13.43	52.433	23.3	4	9	4	cytosol	transport; localization; vesicle-mediated transport; establishment of localization;	intrinsic component of membrane; membrane; integral component of membrane; membrane part;		K08513	VAMP4; vesicle-associated membrane protein 4	aor04130 SNARE interactions in vesicular transport - Aspergillus oryzae;	IPR001388;	Synaptobrevin;	[U]	KOG0860	Synaptobrevin/VAMP-like protein
I8A8J4	"Amine oxidase, flavin-containing superfamily"	6.004	Up	1.49974e-06	Ao3042_02261	53.253	30.047	16.5	7	9	7	extracellular	single-organism process; metabolic process; oxidation-reduction process; single-organism metabolic process;		catalytic activity; oxidoreductase activity;				IPR016040; IPR023753;	NAD(P)-binding domain; FAD/NAD(P)-binding domain;
I8A8K8	Calmodulin-dependent protein phosphatase	0.416	Down	5.56635e-05	Ao3042_01962	21.729	35.237	31.6	4	9	4	nuclear			cation binding; metal ion binding; calcium ion binding; binding; ion binding;	K06268			IPR011992; IPR002048;	EF-hand domain pair; EF-hand domain;	[T]	KOG0034	Ca2+/calmodulin-dependent protein phosphatase (calcineurin subunit B), EF-Hand superfamily protein
I8A8X1	"AMP-binding enzyme, putative"	1.762	Up	0.000137	Ao3042_01738	59.652	150.03	41.8	19	33	19	cytosol	metabolic process;		catalytic activity;				IPR000873;	AMP-dependent synthetase/ligase;
I8A948	Serine/threonine kinase receptor-associated protein	1.542	Up	0.00629	Ao3042_02045	37.162	54.614	22.9	6	6	6	extracellular			protein binding; kinase activity; catalytic activity; transferase activity; binding; transferase activity, transferring phosphorus-containing groups;	K13137	STRAP; serine-threonine kinase receptor-associated protein	aor03013 RNA transport - Aspergillus oryzae;	IPR017986; IPR015943;	WD40-repeat-containing domain; WD40/YVTN repeat-like-containing domain;
I8A949	Eukaryotic translation initiation factor 5A	0.364	Down	3.25e-12	Ao3042_01655	17.305	136.98	84.3	11	53	11	cytosol	positive regulation of cellular protein metabolic process; posttranscriptional regulation of gene expression; positive regulation of protein complex disassembly; positive regulation of biosynthetic process; regulation of translational termination; single-organism process; biosynthetic process; cellular metabolic process; positive regulation of cellular component organization; metabolic process; p…		organic cyclic compound binding; heterocyclic compound binding; ribosome binding; translation factor activity, nucleic acid binding; RNA binding; translation elongation factor activity; binding; nucleic acid binding; macromolecular complex binding; translation initiation factor activity; ribonucleoprotein complex binding;	K03263			IPR008991; IPR012340; IPR014722; IPR020189;	Translation protein SH3-like domain; Nucleic acid-binding, OB-fold; Ribosomal protein L2 domain 2; Translation elongation factor, IF5A C-terminal;	[J]	KOG3271	Translation initiation factor 5A (eIF-5A)
I8A9G2	Glucosidase I	1.778	Up	8.15801e-08	Ao3042_02003	92.764	200.25	31.2	18	28	18	extracellular	single-organism carbohydrate metabolic process; metabolic process; single-organism metabolic process; single-organism process; oligosaccharide metabolic process; primary metabolic process; carbohydrate metabolic process; organic substance metabolic process;		mannosyl-oligosaccharide glucosidase activity; glucosidase activity; hydrolase activity, hydrolyzing O-glycosyl compounds; hydrolase activity; catalytic activity; hydrolase activity, acting on glycosyl bonds;	K01228	GCS1; mannosyl-oligosaccharide glucosidase [EC:3.2.1.106]	aor00510 N-Glycan biosynthesis - Aspergillus oryzae; aor04141 Protein processing in endoplasmic reticulum - Aspergillus oryzae; aor01100 Metabolic pathways - Aspergillus oryzae;	IPR031335; IPR031631; IPR008928;	Glycosyl hydrolase family 63, C-terminal; Glycosyl hydrolase family 63, N-terminal; Six-hairpin glycosidase-like;	[G]	KOG2161	Glucosidase I
I8A9P5	cytochrome protein [Aspergillus oryzae 3.042]	0.083	Down	7.6289e-05	Ao3042_01480	59.07	38.128	22.5	10	16	10	plasma membrane	single-organism process; metabolic process; oxidation-reduction process; single-organism metabolic process;		organic cyclic compound binding; heterocyclic compound binding; heme binding; iron ion binding; transition metal ion binding; catalytic activity; binding; ion binding; cation binding; metal ion binding; oxidoreductase activity, acting on paired donors, with incorporation or reduction of molecular oxygen; monooxygenase activity; tetrapyrrole binding; oxidoreductase activity;						[Q]	KOG0156	Cytochrome P450 CYP2 subfamily
I8A9V9	putative O-methyltransferase [Aspergillus oryzae 3.042]	0.442	Down	0.0149767	Ao3042_01718	26.524	7.1076	14.4	4	4	3	cytosol			transferase activity, transferring one-carbon groups; O-methyltransferase activity; methyltransferase activity; catalytic activity; transferase activity;				IPR029063;	S-adenosyl-L-methionine-dependent methyltransferase;
I8A9W1	Casein kinase	1.533	Up	0.000464	Ao3042_00859	42.979	47.286	40.8	16	34	16	cytosol	phosphorylation; cellular protein metabolic process; primary metabolic process; cellular metabolic process; phosphate-containing compound metabolic process; organic substance metabolic process; metabolic process; protein phosphorylation; phosphorus metabolic process; cellular macromolecule metabolic process; cellular protein modification process; protein metabolic process; macromolecule metabolic…		ATP binding; nucleoside phosphate binding; phosphotransferase activity, alcohol group as acceptor; nucleoside binding; ion binding; nucleotide binding; protein kinase activity; organic cyclic compound binding; heterocyclic compound binding; ribonucleoside binding; carbohydrate derivative binding; kinase activity; ribonucleotide binding; catalytic activity; binding; purine ribonucleoside binding; …	K14758	HRR25; casein kinase I homolog HRR25 [EC:2.7.11.1]	aor03008 Ribosome biogenesis in eukaryotes - Aspergillus oryzae;	IPR000719; IPR011009;	Protein kinase domain; Protein kinase-like domain;	[T]	KOG1164	Casein kinase (serine/threonine/tyrosine protein kinase)
I8A9Z4	Conserved phosducin-like protein	0.631	Down	0.000318696	Ao3042_00856	28.045	14.173	16.2	4	11	4	nuclear							IPR024253; IPR012336;	Phosducin, thioredoxin-like domain; Thioredoxin-like fold;	[T]	KOG3170	Conserved phosducin-like protein
I8AA75	D-aspartate oxidase	2.678	Up	0.0112697	Ao3042_01648	38.218	4.5319	5.1	2	2	2	extracellular	D-amino acid metabolic process; oxidation-reduction process; small molecule metabolic process; single-organism cellular process; nitrogen compound metabolic process; single-organism process; primary metabolic process; alpha-amino acid metabolic process; cellular metabolic process; organic substance metabolic process; metabolic process; cellular amino acid metabolic process; single-organism metabo…		nucleoside phosphate binding; flavin adenine dinucleotide binding; ion binding; nucleotide binding; cofactor binding; FAD binding; oxidoreductase activity; heterocyclic compound binding; organic cyclic compound binding; catalytic activity; binding; anion binding; oxidoreductase activity, acting on the CH-NH2 group of donors; oxidoreductase activity, acting on the CH-NH2 group of donors, oxygen as…				IPR006076; IPR016040;	FAD dependent oxidoreductase; NAD(P)-binding domain;	[E]	KOG3923	D-aspartate oxidase
I8AAG8	GA4 desaturase family protein	0.168	Down	0.000742865	Ao3042_01478	24.501	9.3543	21.7	5	6	5	cytosol
I8AAK8		1.831	Up	6.72901e-09	Ao3042_00722	28.901	34.19	33.3	8	10	8	mitochondria	single-organism process; metabolic process; oxidation-reduction process; single-organism metabolic process;		nucleoside phosphate binding; ion binding; nucleotide binding; cofactor binding; oxidoreductase activity; heterocyclic compound binding; organic cyclic compound binding; carbohydrate derivative binding; ribonucleotide binding; catalytic activity; binding; anion binding; FMN binding; coenzyme binding; small molecule binding;				IPR024624; IPR012349;	Pyridoxamine 5'-phosphate oxidase, Alr4036 family, FMN-binding domain; FMN-binding split barrel;
I8AAR0		1.512	Up	2.24802e-11	Ao3042_00702	12.685	52.93	57.7	7	24	7	mitochondria							IPR011058;	Cyanovirin-N;
I8AB41	Phenylalanine ammonia-lyase	3.959	Up	0.00017	Ao3042_00555	77.342	24.546	11.9	8	11	8	nuclear	erythrose 4-phosphate/phosphoenolpyruvate family amino acid catabolic process; alpha-amino acid catabolic process; cellular aromatic compound metabolic process; single-organism process; biosynthetic process; cellular metabolic process; L-phenylalanine catabolic process; organic substance metabolic process; metabolic process; cellular amino acid metabolic process; cellular catabolic process; organ…	intracellular part; cell; cell part; intracellular; cytoplasm;	lyase activity; carbon-nitrogen lyase activity; phenylalanine ammonia-lyase activity; catalytic activity; ammonia-lyase activity;	K10775	PAL; phenylalanine ammonia-lyase [EC:4.3.1.24]	aor01110 Biosynthesis of secondary metabolites - Aspergillus oryzae; aor00360 Phenylalanine metabolism - Aspergillus oryzae; aor01100 Metabolic pathways - Aspergillus oryzae;	IPR024083; IPR008948;	Fumarase/histidase, N-terminal; L-Aspartase-like;	[Q]	KOG0222	Phenylalanine and histidine ammonia-lyase
I8AB81	Signal recognition particle subunit SRP68	0.659	Down	1.15843e-05	Ao3042_00126	67.022	63.877	29	14	20	14	nuclear	intracellular transport; cellular component organization; establishment of protein localization to organelle; single-organism process; cotranslational protein targeting to membrane; protein transport; establishment of localization; protein targeting; protein targeting to membrane; establishment of localization in cell; single-organism localization; protein localization to endoplasmic reticulum; i…	signal recognition particle, endoplasmic reticulum targeting; cell part; intracellular; signal recognition particle; cytoplasm; macromolecular complex; intracellular part; ribonucleoprotein complex; cell; cytoplasmic part;	organic cyclic compound binding; heterocyclic compound binding; signal sequence binding; RNA binding; peptide binding; signal recognition particle binding; binding; nucleic acid binding; macromolecular complex binding; amide binding; endoplasmic reticulum signal peptide binding; ribonucleoprotein complex binding; 7S RNA binding;	K03107	SRP68; signal recognition particle subunit SRP68	aor03060 Protein export - Aspergillus oryzae;			[U]	KOG2460	Signal recognition particle, subunit Srp68
I8ABM1	4-hydroxy-2-oxovalerate aldolase	1.62	Up	0.00509409	Ao3042_00390	29.316	67.736	47.4	8	14	8	mitochondria	metabolic process; cellular aromatic compound metabolic process; cellular metabolic process; cellular process;		lyase activity; catalytic activity; carbon-carbon lyase activity;	K02510	hpaI; 4-hydroxy-2-oxoheptanedioate aldolase [EC:4.1.2.52]	aor00350 Tyrosine metabolism - Aspergillus oryzae;	IPR015813; IPR005000;	Pyruvate/Phosphoenolpyruvate kinase-like domain; HpcH/HpaI aldolase/citrate lyase domain;
I8ABT4	Inner membrane protein translocase involved in respiratory chain assembly	0.477	Down	1.09514e-07	Ao3042_11902	54.802	22.435	16.7	9	14	9	mitochondria	cellular component organization; protein localization to membrane; single-organism cellular process; single-organism membrane organization; single-organism process; cellular localization; establishment of localization; establishment of protein localization; cellular macromolecule localization; single-organism localization; membrane organization; single-organism cellular localization; protein loca…	intrinsic component of membrane; membrane; integral component of membrane; membrane part;		K03217	yidC; YidC/Oxa1 family membrane protein insertase	aor03060 Protein export - Aspergillus oryzae;			[OU]	KOG1239	Inner membrane protein translocase involved in respiratory chain assembly
I8AC31	Glycosidase crf1	2.097	Up	0.000154847	Ao3042_11795	44.316	40.391	11.8	4	8	4	extracellular	cell wall organization or biogenesis; cellular component organization; metabolic process; primary metabolic process; carbohydrate metabolic process; cell wall organization; external encapsulating structure organization; cellular process; cellular component organization or biogenesis; organic substance metabolic process;	cell wall; external encapsulating structure; cell; cell part; cell periphery;	hydrolase activity, hydrolyzing O-glycosyl compounds; hydrolase activity; catalytic activity; hydrolase activity, acting on glycosyl bonds;				IPR013320; IPR000757;	Concanavalin A-like lectin/glucanase domain; Glycoside hydrolase family 16;
I8AC34	Translation initiation factor 5B	2.92	Up	4.55e-12	Ao3042_00124	118.75	90.392	21.4	21	32	21	nuclear			RNA binding; nucleoside phosphate binding; nucleoside binding; ion binding; hydrolase activity, acting on acid anhydrides; translation initiation factor activity; hydrolase activity; nucleotide binding; nucleoside-triphosphatase activity; heterocyclic compound binding; organic cyclic compound binding; translation factor activity, nucleic acid binding; ribonucleoside binding; carbohydrate derivati…	K03243	EIF5B; translation initiation factor 5B	aor03013 RNA transport - Aspergillus oryzae;	IPR023115; IPR005225; IPR004161; IPR027417; IPR000795; IPR009000;	Translation initiation factor IF- 2, domain 3; Small GTP-binding protein domain; Translation elongation factor EFTu-like, domain 2; P-loop containing nucleoside triphosphate hydrolase; Transcription factor, GTP-binding domain; Translation protein, beta-barrel domain;	[J]	KOG1144	Translation initiation factor 5B (eIF-5B)
I8ACB7	C6 transcription factor [Aspergillus oryzae 3.042]	0.361	Down	0.0419908	Ao3042_00014	100.7	8.204	4.2	3	4	3	nuclear	regulation of cellular process; cellular aromatic compound metabolic process; nucleic acid-templated transcription; regulation of macromolecule metabolic process; regulation of nucleobase-containing compound metabolic process; biosynthetic process; cellular metabolic process; organic substance metabolic process; regulation of RNA biosynthetic process; metabolic process; heterocycle metabolic proc…	organelle; intracellular membrane-bounded organelle; intracellular organelle; nucleus; cell part; intracellular; intracellular part; membrane-bounded organelle; cell;	organic cyclic compound binding; heterocyclic compound binding; DNA binding; sequence-specific DNA binding RNA polymerase II transcription factor activity; transition metal ion binding; binding; ion binding; nucleic acid binding; nucleic acid binding transcription factor activity; cation binding; metal ion binding; zinc ion binding; sequence-specific DNA binding transcription factor activity;				IPR001138; IPR007219;	Zn(2)-C6 fungal-type DNA-binding domain; Transcription factor domain, fungi;
I8ACD0		0.297	Down	2.09287e-09	Ao3042_00051	99.577	64.222	15.5	12	18	12	mitochondria
I8ACD2	Condensin complex subunit 2	0.322	Down	0.00174973	Ao3042_11645	96.758	19.427	7.5	7	8	7	nuclear	cellular component organization; cellular aromatic compound metabolic process; DNA metabolic process; organelle fission; mitotic nuclear division; single-organism process; mitotic cell cycle process; cellular metabolic process; organic substance metabolic process; chromosome condensation; sister chromatid segregation; DNA packaging; metabolic process; heterocycle metabolic process; nucleobase-con…	intracellular organelle; intracellular non-membrane-bounded organelle; intracellular organelle part; macromolecular complex; intracellular part; cell; organelle part; non-membrane-bounded organelle; chromosomal part; condensed chromosome; organelle; condensin complex; cell part; intracellular; chromosome; protein complex; DNA packaging complex;		K06676	BRRN1; condensin complex subunit 2	aor04111 Cell cycle - yeast - Aspergillus oryzae;			[BD]	KOG2328	Chromosome condensation complex Condensin, subunit H
I8ACG0	Protein kinase C	0.329	Down	5.15143e-14	Ao3042_11617	121.85	75.184	17.7	18	26	18	nuclear	regulation of cellular process; single organism signaling; phosphorylation; cellular response to stimulus; intracellular signal transduction; cellular protein metabolic process; single-organism cellular process; single-organism process; primary metabolic process; signaling; response to stimulus; cellular metabolic process; phosphate-containing compound metabolic process; organic substance metabol…		ATP binding; nucleoside phosphate binding; phosphotransferase activity, alcohol group as acceptor; nucleoside binding; ion binding; protein binding; nucleotide binding; protein kinase activity; heterocyclic compound binding; organic cyclic compound binding; ribonucleoside binding; carbohydrate derivative binding; kinase activity; ribonucleotide binding; catalytic activity; binding; purine ribonuc…	K02677	PRKCA; classical protein kinase C alpha type [EC:2.7.11.13]	aor04070 Phosphatidylinositol signaling system - Aspergillus oryzae; aor04011 MAPK signaling pathway - yeast - Aspergillus oryzae; aor04933 AGE-RAGE signaling pathway in diabetic complications - Aspergillus oryzae; aor04139 Mitophagy - yeast - Aspergillus oryzae;	IPR002219; IPR000719; IPR000008; IPR000961; IPR017892; IPR011009;	Protein kinase C-like, phorbol ester/diacylglycerol-binding domain; Protein kinase domain; C2 domain; AGC-kinase, C-terminal; Protein kinase, C-terminal; Protein kinase-like domain;	[T]	KOG0694	Serine/threonine protein kinase
I8ACG4	Checkpoint kinase	0.464	Down	0.000422	Ao3042_11626	89.643	30.092	8.9	6	10	6	nuclear	phosphorylation; cellular protein metabolic process; primary metabolic process; cellular metabolic process; phosphate-containing compound metabolic process; organic substance metabolic process; metabolic process; protein phosphorylation; phosphorus metabolic process; cellular macromolecule metabolic process; cellular protein modification process; protein metabolic process; macromolecule metabolic…		ATP binding; nucleoside phosphate binding; phosphotransferase activity, alcohol group as acceptor; nucleoside binding; ion binding; nucleotide binding; protein kinase activity; organic cyclic compound binding; heterocyclic compound binding; ribonucleoside binding; carbohydrate derivative binding; kinase activity; ribonucleotide binding; catalytic activity; binding; purine ribonucleoside binding; …				IPR000719; IPR011009;	Protein kinase domain; Protein kinase-like domain;	[D]	KOG0590	Checkpoint kinase and related serine/threonine protein kinases
I8ACH6	Glyoxylate/hydroxypyruvate reductase	2.856	Up	0.000161534	Ao3042_11598	40.145	297.02	68.5	24	104	1	cytosol	single-organism process; metabolic process; oxidation-reduction process; single-organism metabolic process;		nucleoside phosphate binding; oxidoreductase activity, acting on the aldehyde or oxo group of donors; nucleotide binding; cofactor binding; oxidoreductase activity; oxidoreductase activity, acting on CH-OH group of donors; oxidoreductase activity, acting on the aldehyde or oxo group of donors, NAD or NADP as acceptor; heterocyclic compound binding; organic cyclic compound binding; oxidoreductase …	K00122	FDH; formate dehydrogenase [EC:1.2.1.2]	aor01200 Carbon metabolism - Aspergillus oryzae; aor00630 Glyoxylate and dicarboxylate metabolism - Aspergillus oryzae; aor00680 Methane metabolism - Aspergillus oryzae; aor01100 Metabolic pathways - Aspergillus oryzae;	IPR006139; IPR006140; IPR016040;	D-isomer specific 2-hydroxyacid dehydrogenase, catalytic domain; D-isomer specific 2-hydroxyacid dehydrogenase, NAD-binding domain; NAD(P)-binding domain;	[C]	KOG0069	Glyoxylate/hydroxypyruvate reductase (D-isomer-specific 2-hydroxy acid dehydrogenase superfamily)
I8ACH8	Ribulose-5-phosphate 4-epimerase	1.964	Up	0.000206795	Ao3042_11957	31.226	33.794	36.2	9	13	9	cytosol							IPR001303;	Class II aldolase/adducin N-terminal;	[TZ]	KOG3699	Cytoskeletal protein Adducin
I8ACI5	"Fumarate reductase, flavoprotein subunit"	0.167	Down	1e-32	Ao3042_11533	54.785	114.28	35.7	16	40	16	mitochondria	single-organism process; metabolic process; oxidation-reduction process; single-organism metabolic process;		oxidoreductase activity, acting on the CH-CH group of donors; succinate dehydrogenase activity; catalytic activity; oxidoreductase activity;				IPR027477; IPR003953; IPR023753;	Succinate dehydrogenase/fumarate reductase flavoprotein, catalytic domain; FAD-dependent oxidoreductase 2, FAD binding domain; FAD/NAD(P)-binding domain;	[C]	KOG2404	Fumarate reductase, flavoprotein subunit
I8ACI9	Isoflavone reductase family protein	1.942	Up	4.88471e-11	Ao3042_11927	35.359	173.85	67.7	18	34	18	mitochondria							IPR016040; IPR008030;	NAD(P)-binding domain; NmrA-like domain;
I8ACK0	Glutathione S-transferase	0.503	Down	0.00822	Ao3042_11534	20.951	7.3421	22.3	3	3	3	mitochondria			protein binding; transferase activity; catalytic activity; binding;	K00799	GST; glutathione S-transferase [EC:2.5.1.18]	aor00480 Glutathione metabolism - Aspergillus oryzae;	IPR010987; IPR004046; IPR004045; IPR012336;	Glutathione S-transferase, C-terminal-like; Glutathione S-transferase, C-terminal; Glutathione S-transferase, N-terminal; Thioredoxin-like fold;
I8ACL3		0.233	Down	6.13608e-08	Ao3042_11891	44.22	64.747	31.4	10	14	10	nuclear
I8ACN9	fungal specific transcription factor [Aspergillus oryzae 3.042]	1.966	Up	0.0337	Ao3042_11429	123.7	92.373	9.6	9	11	9	nuclear	regulation of cellular process; cellular aromatic compound metabolic process; nucleic acid-templated transcription; regulation of macromolecule metabolic process; regulation of nucleobase-containing compound metabolic process; biosynthetic process; cellular metabolic process; organic substance metabolic process; regulation of RNA biosynthetic process; metabolic process; heterocycle metabolic proc…	organelle; intracellular membrane-bounded organelle; intracellular organelle; nucleus; cell part; intracellular; intracellular part; membrane-bounded organelle; cell;	DNA binding; sequence-specific DNA binding RNA polymerase II transcription factor activity; ion binding; zinc ion binding; transferase activity, transferring acyl groups other than amino-acyl groups; acetyltransferase activity; sequence-specific DNA binding transcription factor activity; heterocyclic compound binding; organic cyclic compound binding; transferase activity, transferring acyl groups…				IPR001138; IPR007219;	Zn(2)-C6 fungal-type DNA-binding domain; Transcription factor domain, fungi;
I8ACV4	"NAD dependent epimerase/dehydratase, putative"	4.195	Up	0.00343458	Ao3042_11786	38.014	26.498	16.8	3	6	3	mitochondria	metabolic process; cellular metabolic process; cellular process;		cofactor binding; catalytic activity; binding; coenzyme binding;				IPR001509; IPR016040;	NAD-dependent epimerase/dehydratase; NAD(P)-binding domain;
I8ACW2	putative nucleoside-diphosphate-sugar epimerase [Aspergillus oryzae 3.042]	0.496	Down	0.000469864	Ao3042_11376	38.761	13.286	15.1	5	6	5	mitochondria							IPR016040; IPR008030;	NAD(P)-binding domain; NmrA-like domain;
I8AD79	Rho GTPase effector BNI1	0.654	Down	0.00154184	Ao3042_11596	195.86	20.559	4.6	8	9	8	nuclear	single-organism organelle organization; cellular component organization; actin cytoskeleton organization; organelle organization; actin filament-based process; single-organism cellular process; single-organism process; cytoskeleton organization; cellular process; cellular component organization or biogenesis;		small GTPase binding; Rho GTPase binding; cytoskeletal protein binding; Ras GTPase binding; binding; actin binding; protein binding; GTPase binding; enzyme binding;	K11238	BNI1; cytokinesis protein	aor04011 MAPK signaling pathway - yeast - Aspergillus oryzae;	IPR014767; IPR010473; IPR010472; IPR014768; IPR015425; IPR016024;	Diaphanous autoregulatory (DAD) domain; Formin, GTPase-binding domain; Formin, FH3 domain; Rho GTPase-binding/formin homology 3 (GBD/FH3) domain; Formin, FH2 domain; Armadillo-type fold;	[TZ]	KOG1922	Rho GTPase effector BNI1 and related formins
I8AD89	Thioredoxin/protein disulfide isomerase	2.073	Up	0.00533	Ao3042_11536	51.077	61.128	29	13	21	13	cytosol	regulation of cellular process; homeostatic process; regulation of biological quality; regulation of biological process; cell redox homeostasis; single-organism cellular process; cellular homeostasis; single-organism process; cellular process; biological regulation;		isomerase activity; catalytic activity;	K09584	PDIA6; protein disulfide-isomerase A6 [EC:5.3.4.1]	aor04141 Protein processing in endoplasmic reticulum - Aspergillus oryzae;	IPR013766; IPR012336;	Thioredoxin domain; Thioredoxin-like fold;	[O]	KOG0191	Thioredoxin/protein disulfide isomerase
I8AD93	Uroporphyrinogen decarboxylase	1.587	Up	3.04454e-07	Ao3042_11559	40.766	71.696	36.1	13	29	13	cytosol	cofactor biosynthetic process; pigment biosynthetic process; cellular aromatic compound metabolic process; heme biosynthetic process; single-organism process; protoporphyrinogen IX metabolic process; biosynthetic process; organonitrogen compound biosynthetic process; heme metabolic process; cellular metabolic process; organic substance metabolic process; metabolic process; porphyrin-containing co…		carboxy-lyase activity; lyase activity; uroporphyrinogen decarboxylase activity; catalytic activity; carbon-carbon lyase activity;	K01599	hemE; uroporphyrinogen decarboxylase [EC:4.1.1.37]	aor00860 Porphyrin and chlorophyll metabolism - Aspergillus oryzae; aor01110 Biosynthesis of secondary metabolites - Aspergillus oryzae; aor01100 Metabolic pathways - Aspergillus oryzae;	IPR000257;	Uroporphyrinogen decarboxylase (URO-D);	[H]	KOG2872	Uroporphyrinogen decarboxylase
I8ADC2	"Chaperonin complex component, TCP-1 theta subunit"	0.366	Down	1e-32	Ao3042_05165	61.017	123.63	35.4	18	31	18	cytosol	protein folding; metabolic process; cellular protein metabolic process; cellular macromolecule metabolic process; macromolecule metabolic process; protein metabolic process; primary metabolic process; cellular process; cellular metabolic process; organic substance metabolic process;	intracellular part; cell; cell part; intracellular; cytoplasm;	ATP binding; nucleoside phosphate binding; nucleoside binding; ion binding; protein binding; nucleotide binding; organic cyclic compound binding; heterocyclic compound binding; ribonucleoside binding; carbohydrate derivative binding; ribonucleotide binding; binding; purine ribonucleoside binding; anion binding; purine ribonucleotide binding; unfolded protein binding; adenyl ribonucleotide binding…	K09500			IPR027410; IPR027409; IPR027413;	TCP-1-like chaperonin intermediate domain; GroEL-like apical domain; GroEL-like equatorial domain;	[O]	KOG0362	Chaperonin complex component, TCP-1 theta subunit (CCT8)
I8ADE3	Alpha-galactosidase	0.38	Down	3.97e-08	Ao3042_05118	48.492	36.812	25.1	9	14	9	extracellular	metabolic process; carbohydrate metabolic process; primary metabolic process; organic substance metabolic process;		hydrolase activity, hydrolyzing O-glycosyl compounds; hydrolase activity; catalytic activity; hydrolase activity, acting on glycosyl bonds;	K07407	E3.2.1.22B; alpha-galactosidase [EC:3.2.1.22]	aor00052 Galactose metabolism - Aspergillus oryzae; aor00561 Glycerolipid metabolism - Aspergillus oryzae; aor00600 Sphingolipid metabolism - Aspergillus oryzae; aor00603 Glycosphingolipid biosynthesis - globo and isoglobo series - Aspergillus oryzae;	IPR013785; IPR013780; IPR017853;	Aldolase-type TIM barrel; Glycosyl hydrolase, all-beta; Glycoside hydrolase superfamily;	[G]	KOG2366	Alpha-D-galactosidase (melibiase)
I8ADG3	Dehydrogenase with different specificitie	1.694	Up	5.19917e-06	Ao3042_11461	29.623	167.84	59.2	12	31	11	cytosol			catalytic activity; oxidoreductase activity;				IPR016040;	NAD(P)-binding domain;	[R]	KOG0725	Reductases with broad range of substrate specificities
I8ADH4	"mRNA cleavage and polyadenylation factor I complex, subunit RNA15"	0.411	Down	5.3927e-05	Ao3042_05099	65.997	62.894	18.2	7	18	7	nuclear			organic cyclic compound binding; heterocyclic compound binding; nucleoside phosphate binding; binding; nucleic acid binding; nucleotide binding; small molecule binding;				IPR034069; IPR000504; IPR012677; IPR001374;	R3H domain, Cip2-type; RNA recognition motif domain; Nucleotide-binding alpha-beta plait domain; R3H domain;	[A]	KOG0108	mRNA cleavage and polyadenylation factor I complex, subunit RNA15
I8I6V6	Beta-glucosidase	2.365	Up	5.52364e-08	Ao3042_01015	93.414	139.38	26.6	17	32	17	extracellular	metabolic process; carbohydrate metabolic process; primary metabolic process; organic substance metabolic process;		hydrolase activity, hydrolyzing O-glycosyl compounds; hydrolase activity; catalytic activity; hydrolase activity, acting on glycosyl bonds;	K05349	bglX; beta-glucosidase [EC:3.2.1.21]	aor00460 Cyanoamino acid metabolism - Aspergillus oryzae; aor01110 Biosynthesis of secondary metabolites - Aspergillus oryzae; aor00500 Starch and sucrose metabolism - Aspergillus oryzae; aor01100 Metabolic pathways - Aspergillus oryzae;	IPR002772; IPR001764; IPR026891; IPR017853;	Glycoside hydrolase family 3 C-terminal domain; Glycoside hydrolase, family 3, N-terminal; Fibronectin type III-like domain; Glycoside hydrolase superfamily;
I8I6X0	Glutamine synthetase	1.534	Up	3.01e-06	Ao3042_01182	53.948	32.764	18.7	9	15	9	cytosol	glutamine family amino acid metabolic process; cellular amino acid biosynthetic process; glutamine biosynthetic process; organic acid biosynthetic process; single-organism biosynthetic process; small molecule metabolic process; glutamine metabolic process; single-organism cellular process; single-organism process; nitrogen compound metabolic process; biosynthetic process; alpha-amino acid metabol…		ligase activity, forming carbon-nitrogen bonds; ammonia ligase activity; glutamate-ammonia ligase activity; acid-ammonia (or amide) ligase activity; catalytic activity; ligase activity;	K01915	glnA; glutamine synthetase [EC:6.3.1.2]	aor00910 Nitrogen metabolism - Aspergillus oryzae; aor00630 Glyoxylate and dicarboxylate metabolism - Aspergillus oryzae; aor00220 Arginine biosynthesis - Aspergillus oryzae; aor00250 Alanine, aspartate and glutamate metabolism - Aspergillus oryzae; aor01230 Biosynthesis of amino acids - Aspergillus oryzae; aor01100 Metabolic pathways - Aspergillus oryzae;	IPR008146; IPR008147; IPR014746;	Glutamine synthetase, catalytic domain; Glutamine synthetase, beta-Grasp domain; Glutamine synthetase/guanido kinase, catalytic domain;	[E]	KOG0683	Glutamine synthetase
I8I6Y5	Putative pfkB family carbohydrate kinase	2.165	Up	3.24896e-12	Ao3042_01231	38.503	266.25	60.1	23	60	23	cytosol	nucleoside metabolic process; purine nucleoside metabolic process; cellular aromatic compound metabolic process; single-organism process; purine ribonucleoside biosynthetic process; nucleoside biosynthetic process; biosynthetic process; organonitrogen compound biosynthetic process; nucleoside salvage; cellular metabolic process; organic substance metabolic process; metabolic process; carbohydrate…		kinase activity; nucleoside kinase activity; catalytic activity; nucleobase-containing compound kinase activity; transferase activity; adenosine kinase activity; transferase activity, transferring phosphorus-containing groups;	K00856	E2.7.1.20; adenosine kinase [EC:2.7.1.20]	aor00230 Purine metabolism - Aspergillus oryzae; aor01100 Metabolic pathways - Aspergillus oryzae;	IPR011611; IPR029056;	Carbohydrate kinase PfkB; Ribokinase-like;	[G]	KOG2854	Possible pfkB family carbohydrate kinase
I8I7L5	Imidazolonepropionase	1.768	Up	0.000172	Ao3042_11174	50.56	24.087	17.5	8	11	8	mitochondria			hydrolase activity; catalytic activity; hydrolase activity, acting on carbon-nitrogen (but not peptide) bonds;				IPR032466; IPR006680; IPR011059;	Metal-dependent hydrolase; Amidohydrolase-related; Metal-dependent hydrolase, composite domain;
I8I854	Translation initiation factor 2	0.384	Down	3.25046e-05	Ao3042_11069	110.57	33.493	13.4	12	14	12	mitochondria	cellular protein metabolic process; biosynthetic process; primary metabolic process; organic substance biosynthetic process; cellular metabolic process; cellular biosynthetic process; organic substance metabolic process; metabolic process; cellular macromolecule biosynthetic process; translational initiation; cellular macromolecule metabolic process; gene expression; macromolecule metabolic proce…	cell; intracellular; cell part;	nucleoside phosphate binding; hydrolase activity, acting on acid anhydrides; translation initiation factor activity; hydrolase activity; heterocyclic compound binding; organic cyclic compound binding; pyrophosphatase activity; catalytic activity; ribonucleotide binding; binding; GTPase activity; purine ribonucleoside binding; cation binding; anion binding; hydrolase activity, acting on acid anhyd…	K02519			IPR023115; IPR005225; IPR006847; IPR027417; IPR000795; IPR001876; IPR009000;	Translation initiation factor IF- 2, domain 3; Small GTP-binding protein domain; Translation initiation factor IF-2, N-terminal; P-loop containing nucleoside triphosphate hydrolase; Transcription factor, GTP-binding domain; Zinc finger, RanBP2-type; Translation protein, beta-barrel domain;	[J]	KOG1145	Mitochondrial translation initiation factor 2 (IF-2; GTPase)
I8I8F2		0.603	Down	0.00322089	Ao3042_10639	62.935	33.338	20.4	10	13	10	nuclear
I8I9C8	NAD-dependent aldehyde dehydrogenase	1.579	Up	2.27e-07	Ao3042_10592	52.451	109.4	31.2	13	23	13	cytosol	single-organism process; metabolic process; oxidation-reduction process; single-organism metabolic process;		oxidoreductase activity, acting on the aldehyde or oxo group of donors, NAD or NADP as acceptor; catalytic activity; oxidoreductase activity; oxidoreductase activity, acting on the aldehyde or oxo group of donors;	K00130	betB; betaine-aldehyde dehydrogenase [EC:1.2.1.8]	aor00260 Glycine, serine and threonine metabolism - Aspergillus oryzae; aor01100 Metabolic pathways - Aspergillus oryzae;	IPR016161; IPR015590; IPR016162; IPR016163;	Aldehyde/histidinol dehydrogenase; Aldehyde dehydrogenase domain; Aldehyde dehydrogenase N-terminal domain; Aldehyde dehydrogenase, C-terminal;	[C]	KOG2450	Aldehyde dehydrogenase
I8I9F3	Putative NADP-dependent oxidoreductase	0.551	Down	0.00222	Ao3042_10211	38.175	41.59	18.8	6	10	6	cytosol	single-organism process; metabolic process; oxidation-reduction process; single-organism metabolic process;		transition metal ion binding; catalytic activity; binding; ion binding; metal ion binding; cation binding; zinc ion binding; oxidoreductase activity;	K07119			IPR011032; IPR020843; IPR016040; IPR013149;	GroES-like; Polyketide synthase, enoylreductase domain; NAD(P)-binding domain; Alcohol dehydrogenase, C-terminal;	[R]	KOG1196	Predicted NAD-dependent oxidoreductase
I8I9S4	DUTPase	2.187	Up	0.000747985	Ao3042_09869	25.59	91.233	48.9	9	15	8	mitochondria	cellular aromatic compound metabolic process; dUTP metabolic process; pyrimidine nucleoside triphosphate metabolic process; nucleotide metabolic process; single-organism process; deoxyribonucleoside triphosphate metabolic process; 2'-deoxyribonucleotide metabolic process; deoxyribonucleotide metabolic process; cellular metabolic process; phosphate-containing compound metabolic process; organic su…		nucleoside-triphosphate diphosphatase activity; hydrolase activity, acting on acid anhydrides; hydrolase activity; pyrophosphatase activity; hydrolase activity, acting on acid anhydrides, in phosphorus-containing anhydrides; catalytic activity; dUTP diphosphatase activity;	K01520	dut; dUTP pyrophosphatase [EC:3.6.1.23]	aor00240 Pyrimidine metabolism - Aspergillus oryzae; aor01100 Metabolic pathways - Aspergillus oryzae;	IPR033704; IPR029054;	dUTPase, trimeric; dUTPase-like;	[F]	KOG3370	dUTPase
I8I9T5		0.613	Down	0.031915	Ao3042_10034	43.187	10.136	12.8	5	6	5	nuclear	cellular aromatic compound metabolic process; nucleic acid-templated transcription; DNA-templated transcription, initiation; biosynthetic process; cellular metabolic process; organic substance metabolic process; metabolic process; heterocycle metabolic process; aromatic compound biosynthetic process; nucleobase-containing compound metabolic process; cellular nitrogen compound metabolic process; m…	intracellular organelle; DNA-directed RNA polymerase complex; nuclear DNA-directed RNA polymerase complex; transcription factor TFIIF complex; intracellular organelle part; RNA polymerase complex; macromolecular complex; nuclear lumen; intracellular part; transferase complex; cell; transcription factor complex; nuclear transcription factor complex; organelle part; DNA-directed RNA polymerase II, …	ATP binding; nucleoside phosphate binding; nucleoside binding; ion binding; nucleotide binding; organic cyclic compound binding; heterocyclic compound binding; ribonucleoside binding; carbohydrate derivative binding; catalytic activity; ribonucleotide binding; binding; purine ribonucleoside binding; anion binding; purine ribonucleotide binding; adenyl ribonucleotide binding; adenyl nucleotide bin…	K03139	TFIIF2; transcription initiation factor TFIIF subunit beta [EC:3.6.4.12]	aor03022 Basal transcription factors - Aspergillus oryzae;	IPR011991; IPR011039;	Winged helix-turn-helix DNA-binding domain; Transcription Factor IIF, Rap30/Rap74, interaction;	[K]	KOG2905	Transcription initiation factor IIF, small subunit (RAP30)
I8IAA0		0.319	Down	0.0283276	Ao3042_09712	42.486	4.7557	6.5	2	5	2	nuclear			magnesium ion binding; catalytic activity; terpene synthase activity; binding; ion binding; metal ion binding; cation binding; lyase activity; carbon-oxygen lyase activity, acting on phosphates; carbon-oxygen lyase activity;				IPR008949;	Isoprenoid synthase domain;
I8IAS4	WW domain protein	0.612	Down	3.72033e-05	Ao3042_09620	37.198	56.685	28	4	19	4	nuclear			protein binding; binding;				IPR001202;	WW domain;
I8IAT9	2-polyprenyl-6-methoxyphenol hydroxylase [Aspergillus oryzae 3.042]	0.589	Down	1.26945e-05	Ao3042_09483	52.165	78.284	32	15	23	15	cytosol	single-organism process; metabolic process; oxidation-reduction process; single-organism metabolic process;		organic cyclic compound binding; heterocyclic compound binding; nucleoside phosphate binding; flavin adenine dinucleotide binding; catalytic activity; binding; ion binding; anion binding; nucleotide binding; cofactor binding; oxidoreductase activity; small molecule binding; FAD binding; coenzyme binding;				IPR002938; IPR023753;	FAD-binding domain; FAD/NAD(P)-binding domain;	[CR]	KOG2614	Kynurenine 3-monooxygenase and related flavoprotein monooxygenases
I8IAW1	"D-amino acid oxidase, putative"	3.667	Up	0.00163587	Ao3042_09439	45.84	5.998	7.4	3	3	3	mitochondria	D-amino acid metabolic process; oxidation-reduction process; small molecule metabolic process; single-organism cellular process; nitrogen compound metabolic process; single-organism process; primary metabolic process; alpha-amino acid metabolic process; cellular metabolic process; organic substance metabolic process; metabolic process; cellular amino acid metabolic process; single-organism metabo…		nucleoside phosphate binding; flavin adenine dinucleotide binding; ion binding; nucleotide binding; cofactor binding; FAD binding; oxidoreductase activity; heterocyclic compound binding; organic cyclic compound binding; catalytic activity; binding; anion binding; oxidoreductase activity, acting on the CH-NH2 group of donors, oxygen as acceptor; oxidoreductase activity, acting on the CH-NH2 group …				IPR006076; IPR016040;	FAD dependent oxidoreductase; NAD(P)-binding domain;
I8IB82		3.459	Up	0.0240518	Ao3042_08628	32.143	43.042	32.1	7	10	7	cytosol	metabolic process;		transferase activity, transferring one-carbon groups; methyltransferase activity; catalytic activity; transferase activity;				IPR029063; IPR013216;	S-adenosyl-L-methionine-dependent methyltransferase; Methyltransferase type 11;
I8IBI4	Thioredoxin reductase	5.148	Up	5.20978e-07	Ao3042_08848	34.04	55.152	35.6	9	13	9	cytosol	single-organism process; metabolic process; oxidation-reduction process; single-organism metabolic process;		catalytic activity; oxidoreductase activity;				IPR023753;	FAD/NAD(P)-binding domain;
I8IBT8	Carboxypeptidase C	1.788	Up	0.000123041	Ao3042_08945	68.579	84.244	17.6	7	10	7	extracellular	proteolysis; metabolic process; macromolecule metabolic process; protein metabolic process; primary metabolic process; organic substance metabolic process;		carboxypeptidase activity; peptidase activity; exopeptidase activity; catalytic activity; serine hydrolase activity; serine-type peptidase activity; peptidase activity, acting on L-amino acid peptides; hydrolase activity; serine-type carboxypeptidase activity; serine-type exopeptidase activity;				IPR029058;	Alpha/Beta hydrolase fold;	[OE]	KOG1282	Serine carboxypeptidases (lysosomal cathepsin A)
I8ID60	Synaptic vesicle transporter SVOP	4.209	Up	0.00431116	Ao3042_08570	54.329	6.9073	4.2	3	4	3	plasma membrane	transport; transmembrane transport; single-organism localization; single-organism cellular process; single-organism process; localization; cellular process; single-organism transport; establishment of localization;	intrinsic component of membrane; membrane; integral component of membrane; membrane part;					IPR020846;	Major facilitator superfamily domain;	[R]	KOG0255	Synaptic vesicle transporter SVOP and related transporters (major facilitator superfamily)
I8IDP1	"Homogentisate 1,2-dioxygenase"	0.281	Down	1.77636e-15	Ao3042_07847	54.216	181.71	42.6	17	38	17	cytosol	erythrose 4-phosphate/phosphoenolpyruvate family amino acid catabolic process; alpha-amino acid catabolic process; cellular aromatic compound metabolic process; single-organism process; cellular metabolic process; L-phenylalanine catabolic process; organic substance metabolic process; metabolic process; cellular amino acid metabolic process; cellular catabolic process; organic cyclic compound cat…		oxidoreductase activity, acting on single donors with incorporation of molecular oxygen, incorporation of two atoms of oxygen; oxidoreductase activity, acting on single donors with incorporation of molecular oxygen; homogentisate 1,2-dioxygenase activity; catalytic activity; dioxygenase activity; oxidoreductase activity;	K00451	HGD; homogentisate 1,2-dioxygenase [EC:1.13.11.5]	aor00350 Tyrosine metabolism - Aspergillus oryzae; aor01100 Metabolic pathways - Aspergillus oryzae;	IPR011051; IPR014710;	RmlC-like cupin domain; RmlC-like jelly roll fold;
I8IDP6	Putative glutathione S-transferase	2.125	Up	1.00971e-09	Ao3042_07921	44.465	94.988	41	14	30	14	mitochondria			protein binding; transferase activity; catalytic activity; binding;	K07393			IPR010987; IPR004045; IPR012336;	Glutathione S-transferase, C-terminal-like; Glutathione S-transferase, N-terminal; Thioredoxin-like fold;	[O]	KOG2903	Predicted glutathione S-transferase
I8IDT7		0.241	Down	1.35012e-06	Ao3042_07858	18.613	12.464	21	3	8	3	plasma membrane		membrane;					IPR008253;	Marvel domain;
I8IE01		1.628	Up	1.23397e-10	Ao3042_07716	15.65	40.662	53.5	8	18	8	mitochondria	DNA replication; cellular aromatic compound metabolic process; DNA metabolic process; organic cyclic compound metabolic process; nitrogen compound metabolic process; biosynthetic process; primary metabolic process; organic substance biosynthetic process; cellular metabolic process; cellular biosynthetic process; organic substance metabolic process; metabolic process; cellular macromolecule biosyn…	organelle; intracellular membrane-bounded organelle; intracellular organelle; cell part; intracellular; cytoplasm; intracellular part; membrane-bounded organelle; cell; mitochondrion; cytoplasmic part;	organic cyclic compound binding; heterocyclic compound binding; DNA binding; binding; nucleic acid binding; single-stranded DNA binding; structure-specific DNA binding;				IPR012340;	Nucleic acid-binding, OB-fold;
I8IEB4	Dolichyl-diphosphooligosaccharide--protein glycosyltransferase subunit WBP1	1.799	Up	1.28366e-11	Ao3042_07522	50.919	95.893	55.8	23	42	23	plasma membrane	macromolecule glycosylation; cellular protein metabolic process; single-organism process; biosynthetic process; peptidyl-asparagine modification; cellular metabolic process; organic substance metabolic process; metabolic process; carbohydrate derivative biosynthetic process; carbohydrate derivative metabolic process; protein metabolic process; macromolecule metabolic process; macromolecule biosyn…	membrane; intracellular organelle; endoplasmic reticulum; nuclear outer membrane-endoplasmic reticulum membrane network; bounding membrane of organelle; organelle membrane; cytoplasm; intracellular organelle part; endomembrane system; intracellular part; cell; organelle part; intracellular membrane-bounded organelle; organelle; endoplasmic reticulum part; intracellular; cell part; membrane part; …	dolichyl-diphosphooligosaccharide-protein glycotransferase activity; transferase activity, transferring glycosyl groups; transferase activity, transferring hexosyl groups; catalytic activity; transferase activity; oligosaccharyl transferase activity;	K12670	WBP1; oligosaccharyltransferase complex subunit beta	aor00510 N-Glycan biosynthesis - Aspergillus oryzae; aor04141 Protein processing in endoplasmic reticulum - Aspergillus oryzae; aor00513 Various types of N-glycan biosynthesis - Aspergillus oryzae; aor01100 Metabolic pathways - Aspergillus oryzae;			[O]	KOG2754	Oligosaccharyltransferase, beta subunit
I8IEQ3	Aldo/keto reductase family protein	1.679	Up	1.87546e-06	Ao3042_07381	31.844	44.729	45	12	31	11	mitochondria	single-organism process; metabolic process; oxidation-reduction process; single-organism metabolic process;		catalytic activity; oxidoreductase activity;				IPR023210;	NADP-dependent oxidoreductase domain;	[R]	KOG1577	Aldo/keto reductase family proteins
I8IF17	Phosphatidylinositol transfer protein	1.588	Up	0.000101	Ao3042_07311	67.061	59.461	27.1	15	22	15	mitochondria							IPR001251; IPR011074;	CRAL-TRIO lipid binding domain; CRAL/TRIO, N-terminal domain;	[I]	KOG1470	Phosphatidylinositol transfer protein PDR16 and related proteins
I8IF32	Dolichol-phosphate mannosyltransferase	0.638	Down	0.00338093	Ao3042_07131	27.907	24.33	25.3	6	10	6	mitochondria			transferase activity, transferring glycosyl groups; catalytic activity; transferase activity;	K00721	DPM1; dolichol-phosphate mannosyltransferase [EC:2.4.1.83]	aor00510 N-Glycan biosynthesis - Aspergillus oryzae; aor01100 Metabolic pathways - Aspergillus oryzae;	IPR029044; IPR001173;	Nucleotide-diphospho-sugar transferases; Glycosyltransferase 2-like;	[R]	KOG2978	Dolichol-phosphate mannosyltransferase
I8IF36	Acetolactate synthase	0.498	Down	5.30331e-12	Ao3042_07149	75.114	163.89	38.1	19	43	18	mitochondria	organic acid biosynthetic process; branched-chain amino acid biosynthetic process; single-organism process; biosynthetic process; organonitrogen compound biosynthetic process; cellular metabolic process; valine metabolic process; organic substance metabolic process; metabolic process; cellular amino acid metabolic process; alpha-amino acid biosynthetic process; branched-chain amino acid metabolic…		magnesium ion binding; vitamin binding; nucleoside phosphate binding; flavin adenine dinucleotide binding; acetolactate synthase activity; ion binding; nucleotide binding; sulfur compound binding; cofactor binding; thiamine pyrophosphate binding; heterocyclic compound binding; organic cyclic compound binding; catalytic activity; binding; transferase activity, transferring aldehyde or ketonic grou…	K01652	E2.2.1.6L; acetolactate synthase I/II/III large subunit [EC:2.2.1.6]	aor01110 Biosynthesis of secondary metabolites - Aspergillus oryzae; aor00660 C5-Branched dibasic acid metabolism - Aspergillus oryzae; aor01210 2-Oxocarboxylic acid metabolism - Aspergillus oryzae; aor00770 Pantothenate and CoA biosynthesis - Aspergillus oryzae; aor00290 Valine, leucine and isoleucine biosynthesis - Aspergillus oryzae; aor01130 Biosynthesis of antibiotics - Aspergillus oryzae; a…	IPR012000; IPR029035; IPR029061; IPR011766; IPR012001;	Thiamine pyrophosphate enzyme, central domain; DHS-like NAD/FAD-binding domain; Thiamin diphosphate-binding fold; Thiamine pyrophosphate enzyme, C-terminal TPP-binding; Thiamine pyrophosphate enzyme, N-terminal TPP-binding domain;	[EH]	KOG4166	Thiamine pyrophosphate-requiring enzyme
I8IFL3	Putative Rossmann fold nucleotide-binding protein	0.435	Down	0.0142902	Ao3042_06808	25.325	13.551	22.9	5	7	5	cytosol				K06966
I8IFN6		0.265	Down	9.48389e-07	Ao3042_06852	26.124	52.074	49.3	10	13	10	cytosol
I8IFT2	Proliferating cell nuclear antigen	1.507	Up	6.57844e-07	Ao3042_06758	28.35	77.815	35.7	7	16	7	nuclear	regulation of cellular process; DNA replication; regulation of DNA replication; cellular aromatic compound metabolic process; regulation of macromolecule metabolic process; DNA metabolic process; regulation of nucleobase-containing compound metabolic process; biosynthetic process; cellular metabolic process; organic substance metabolic process; metabolic process; heterocycle metabolic process; nu…	organelle; intracellular membrane-bounded organelle; intracellular organelle; nucleus; PCNA complex; cell part; intracellular; macromolecular complex; intracellular part; protein complex; membrane-bounded organelle; cell; DNA polymerase processivity factor complex;	organic cyclic compound binding; heterocyclic compound binding; DNA binding; enzyme regulator activity; binding; DNA polymerase processivity factor activity; nucleic acid binding; molecular function regulator;	K04802	PCNA; proliferating cell nuclear antigen	aor03420 Nucleotide excision repair - Aspergillus oryzae; aor03030 DNA replication - Aspergillus oryzae; aor03410 Base excision repair - Aspergillus oryzae; aor03430 Mismatch repair - Aspergillus oryzae;	IPR022649; IPR022648;	Proliferating cell nuclear antigen, PCNA, C-terminal; Proliferating cell nuclear antigen, PCNA, N-terminal;	[L]	KOG1636	DNA polymerase delta processivity factor (proliferating cell nuclear antigen)
I8IFZ0	Glycolate oxidase	1.726	Up	2.56837e-10	Ao3042_06579	55.467	90.253	42.2	15	29	15	cytoskeleton	single-organism process; metabolic process; oxidation-reduction process; single-organism metabolic process;		nucleoside phosphate binding; ion binding; nucleotide binding; cofactor binding; oxidoreductase activity; heterocyclic compound binding; organic cyclic compound binding; heme binding; carbohydrate derivative binding; catalytic activity; ribonucleotide binding; binding; metal ion binding; cation binding; anion binding; FMN binding; tetrapyrrole binding; small molecule binding; coenzyme binding;	K00101	E1.1.2.3; L-lactate dehydrogenase (cytochrome) [EC:1.1.2.3]	aor00620 Pyruvate metabolism - Aspergillus oryzae; aor01100 Metabolic pathways - Aspergillus oryzae;	IPR013785; IPR000262; IPR001199;	Aldolase-type TIM barrel; FMN-dependent dehydrogenase; Cytochrome b5-like heme/steroid binding domain;	[C]	KOG0538	Glycolate oxidase
I8IG04	"Vacuolar sorting protein VPS1, dynamin"	0.543	Down	4.12559e-13	Ao3042_06656	77.514	274.82	43.5	29	56	27	nuclear			nucleoside phosphate binding; nucleoside binding; ion binding; hydrolase activity, acting on acid anhydrides; hydrolase activity; nucleotide binding; nucleoside-triphosphatase activity; organic cyclic compound binding; heterocyclic compound binding; ribonucleoside binding; carbohydrate derivative binding; pyrophosphatase activity; catalytic activity; ribonucleotide binding; binding; GTPase activi…	K17065	DNM1L; dynamin 1-like protein [EC:3.6.5.5]	aor04139 Mitophagy - yeast - Aspergillus oryzae;	IPR030381; IPR003130; IPR001401; IPR020850; IPR027417; IPR000375;	Dynamin-type guanine nucleotide-binding (G) domain; Dynamin GTPase effector; Dynamin, GTPase domain; GTPase effector domain; P-loop containing nucleoside triphosphate hydrolase; Dynamin central domain;	[UR]	KOG0446	Vacuolar sorting protein VPS1, dynamin, and related proteins
I8IGJ1		4.04	Up	4.34e-09	Ao3042_06241	86.19	46.007	8.1	6	9	6	cytosol			ATP binding; nucleoside phosphate binding; nucleoside binding; ion binding; hydrolase activity, acting on acid anhydrides; hydrolase activity; nucleotide binding; nucleoside-triphosphatase activity; organic cyclic compound binding; heterocyclic compound binding; ribonucleoside binding; carbohydrate derivative binding; pyrophosphatase activity; catalytic activity; ribonucleotide binding; binding; …				IPR003959; IPR003593; IPR027417;	ATPase, AAA-type, core; AAA+ ATPase domain; P-loop containing nucleoside triphosphate hydrolase;
I8IGM1	Tropomyosin-1	0.562	Down	0.0128385	Ao3042_06303	14.291	27.153	49.6	4	5	4	nuclear				K17945
I8IGN6	Intermembrane space protein	0.381	Down	0.016	Ao3042_06271	30.781	81.295	37.2	8	14	8	mitochondria				K17782			IPR010625;	CHCH;	[S]	KOG4149	Uncharacterized conserved protein
I8IH07		0.541	Down	0.0246813	Ao3042_06000	63.584	9.0956	5.7	3	4	3	extracellular			protein binding; binding;				IPR001810;	F-box domain;
I8IHJ9	Lectin VIP36 protein	1.586	Up	8.00756e-07	Ao3042_05759	35.705	52.094	39.1	10	20	10	extracellular		membrane;		K10082	LMAN2; lectin, mannose-binding 2	aor04141 Protein processing in endoplasmic reticulum - Aspergillus oryzae;	IPR005052; IPR013320;	Legume-like lectin; Concanavalin A-like lectin/glucanase domain;	[U]	KOG3839	Lectin VIP36, involved in the transport of glycoproteins carrying high mannose-type glycans
I8IHK8		0.55	Down	0.00125266	Ao3042_05730	137.64	107.01	9.7	11	14	11	nuclear			binding;	K14794			IPR011989; IPR016024; IPR012978;	Armadillo-like helical; Armadillo-type fold; Uncharacterised domain NUC173;	[S]	KOG1248	Uncharacterized conserved protein
I8IHM7	Small nuclear ribonucleoprotein	1.646	Up	0.038792	Ao3042_05744	13.537	3.7631	8.3	1	3	1	nuclear		viral capsid; cell part; intracellular; virion; macromolecular complex; intracellular part; cell; ribonucleoprotein complex; virion part; viral nucleocapsid;		K12623	LSM4; U6 snRNA-associated Sm-like protein LSm4	aor03018 RNA degradation - Aspergillus oryzae; aor03040 Spliceosome - Aspergillus oryzae;	IPR001163; IPR010920;	LSM domain, eukaryotic/archaea-type; LSM domain;	[A]	KOG3293	Small nuclear ribonucleoprotein (snRNP)
I8IHP7	"Lon protease homolog, mitochondrial"	0.362	Down	3.9206e-08	PIM1	122.75	64.339	17.6	19	24	18	mitochondria	cellular component biogenesis; regulation of DNA-dependent DNA replication; cellular metabolic process; regulation of mitochondrion organization; metabolic process; cellular component assembly; macromolecular complex assembly; regulation of mitochondrial DNA replication; response to oxidative stress; cellular response to oxidative stress; macromolecule metabolic process; protein metabolic process…	mitochondrial matrix; intracellular organelle; mitochondrial part; cytoplasm; intracellular organelle part; intracellular part; cell; mitochondrion; organelle part; membrane-enclosed lumen; organelle; intracellular membrane-bounded organelle; intracellular organelle lumen; cell part; intracellular; membrane-bounded organelle; cytoplasmic part; organelle lumen;	peptidase activity; nucleoside phosphate binding; serine-type peptidase activity; hydrolase activity, acting on acid anhydrides; hydrolase activity; ATP-dependent peptidase activity; ATPase activity; organic cyclic compound binding; heterocyclic compound binding; pyrophosphatase activity; ribonucleotide binding; catalytic activity; binding; purine ribonucleoside binding; anion binding; adenyl rib…	K08675			IPR003959; IPR015947; IPR027417; IPR003111; IPR008269; IPR003593; IPR020568; IPR014721;	ATPase, AAA-type, core; PUA-like domain; P-loop containing nucleoside triphosphate hydrolase; ATP-dependent protease La (LON), substrate-binding domain; Peptidase S16, Lon C-terminal; AAA+ ATPase domain; Ribosomal protein S5 domain 2-type fold; Ribosomal protein S5 domain 2-type fold, subgroup;	[O]	KOG2004	Mitochondrial ATP-dependent protease PIM1/LON
I8IHU1		1.751	Up	5.78271e-07	Ao3042_05669	24.939	19.155	29.4	6	15	6	mitochondria	cellular protein metabolic process; biosynthetic process; primary metabolic process; cellular metabolic process; organic substance biosynthetic process; cellular biosynthetic process; organic substance metabolic process; metabolic process; cellular macromolecule biosynthetic process; cellular macromolecule metabolic process; gene expression; macromolecule metabolic process; protein metabolic proc…	mitochondrial matrix; ribosome; intracellular organelle; mitochondrial part; intracellular non-membrane-bounded organelle; intracellular organelle part; cytoplasm; macromolecular complex; intracellular part; mitochondrial ribosome; cell; organellar ribosome; organelle part; mitochondrion; non-membrane-bounded organelle; intracellular membrane-bounded organelle; membrane-enclosed lumen; organelle;…	structural constituent of ribosome; structural molecule activity;	K17428					[J]	KOG3331	Mitochondrial/chloroplast ribosomal protein L4/L29
I8IIU4	Dimeric dihydrodiol dehydrogenase	1.962	Up	1.30436e-07	Ao3042_04895	39.39	38.096	28.7	11	15	11	cytoskeleton			catalytic activity; oxidoreductase activity;				IPR000683; IPR016040;	Oxidoreductase, N-terminal; NAD(P)-binding domain;	[GQ]	KOG2741	Dimeric dihydrodiol dehydrogenase
I8IJF6	Mercuric reductase	0.586	Down	0.0214861	Ao3042_04822	46.248	35.076	21.1	7	9	7	mitochondria	single-organism process; metabolic process; oxidation-reduction process; single-organism metabolic process;		organic cyclic compound binding; heterocyclic compound binding; nucleoside phosphate binding; flavin adenine dinucleotide binding; catalytic activity; binding; ion binding; anion binding; nucleotide binding; cofactor binding; oxidoreductase activity; small molecule binding; coenzyme binding;				IPR023753;	FAD/NAD(P)-binding domain;	[C]	KOG2495	NADH-dehydrogenase (ubiquinone)
I8IJH5	Aromatic amino acid aminotransferase	2.259	Up	4.14e-10	Ao3042_04643	58.402	101.36	40.5	16	31	16	cytoskeleton	biosynthetic process; metabolic process;		organic cyclic compound binding; heterocyclic compound binding; transferase activity, transferring nitrogenous groups; catalytic activity; binding; ion binding; anion binding; transaminase activity; transferase activity; cofactor binding; pyridoxal phosphate binding;	K00838	ARO8; aromatic amino acid aminotransferase I [EC:2.6.1.57 2.6.1.27 2.6.1.5]	aor00350 Tyrosine metabolism - Aspergillus oryzae; aor01110 Biosynthesis of secondary metabolites - Aspergillus oryzae; aor00270 Cysteine and methionine metabolism - Aspergillus oryzae; aor00360 Phenylalanine metabolism - Aspergillus oryzae; aor00130 Ubiquinone and other terpenoid-quinone biosynthesis - Aspergillus oryzae; aor00400 Phenylalanine, tyrosine and tryptophan biosynthesis - Aspergillus…	IPR015424; IPR004839; IPR015422; IPR015421;	Pyridoxal phosphate-dependent transferase; Aminotransferase, class I/classII; Pyridoxal phosphate-dependent transferase, major region, subdomain 2; Pyridoxal phosphate-dependent transferase, major region, subdomain 1;	[E]	KOG0634	Aromatic amino acid aminotransferase and related proteins
I8IKL0		1.827	Up	4.60587e-06	Ao3042_04010	39.276	32.82	29.9	10	15	10	extracellular
I8IKQ3	Endo-chitosanase	0.516	Down	6.67864e-08	Ao3042_04009	38.896	56.422	25.8	8	17	8	extracellular
I8IL33	"Translation initiation factor 4F, helicase subunit"	0.613	Down	6.2888e-09	Ao3042_03823	44.714	256.85	74.1	25	82	23	nuclear			nucleoside phosphate binding; ATP-dependent helicase activity; hydrolase activity, acting on acid anhydrides; translation initiation factor activity; hydrolase activity; ATPase activity; heterocyclic compound binding; organic cyclic compound binding; pyrophosphatase activity; catalytic activity; ribonucleotide binding; binding; purine ribonucleoside binding; anion binding; adenyl ribonucleotide b…	K03257	EIF4A; translation initiation factor 4A	aor03013 RNA transport - Aspergillus oryzae;	IPR014014; IPR011545; IPR014001; IPR027417; IPR001650;	RNA helicase, DEAD-box type, Q motif; DEAD/DEAH box helicase domain; Helicase superfamily 1/2, ATP-binding domain; P-loop containing nucleoside triphosphate hydrolase; Helicase, C-terminal;	[J]	KOG0327	Translation initiation factor 4F, helicase subunit (eIF-4A) and related helicases
I8IL64	Putative dinucleotide-utilizing enzyme involved in molybdopterin and thiamine biosynthesis	0.603	Down	7.45014e-08	Ao3042_03785	56.486	56.183	30	13	20	13	extracellular			small protein activating enzyme activity; ligase activity, forming carbon-sulfur bonds; catalytic activity; ligase activity;				IPR000594; IPR016040;	THIF-type NAD/FAD binding fold; NAD(P)-binding domain;	[O]	KOG2018	Predicted dinucleotide-utilizing enzyme involved in molybdopterin and thiamine biosynthesis
I8ILB1	Homoserine acetyltransferase	3.525	Up	3.71715e-08	Ao3042_03631	36.749	15.9	12.2	4	8	4	cytosol			transferase activity; catalytic activity;	K00641	metX; homoserine O-acetyltransferase [EC:2.3.1.31]	aor01130 Biosynthesis of antibiotics - Aspergillus oryzae; aor00270 Cysteine and methionine metabolism - Aspergillus oryzae; aor01100 Metabolic pathways - Aspergillus oryzae;	IPR029058; IPR000073;	Alpha/Beta hydrolase fold; Alpha/beta hydrolase fold-1;
I8ILX6	WD40 repeat-containing protein	1.658	Up	0.000376073	Ao3042_03463	59.644	19.023	13.3	6	9	6	mitochondria			protein binding; binding;	K14791			IPR017986; IPR015943;	WD40-repeat-containing domain; WD40/YVTN repeat-like-containing domain;	[S]	KOG0270	WD40 repeat-containing protein
I8IMM4	Promoter region-related protein	0.489	Down	9.67591e-07	Ao3042_02766	193.01	44.795	9	12	15	12	nuclear	cellular component biogenesis; organelle localization; cellular component organization; vesicle coating; intracellular transport; vesicle targeting, rough ER to cis-Golgi; COPII vesicle coating; single-organism process; Golgi vesicle transport; vesicle targeting; localization within membrane; establishment of localization; establishment of localization in cell; single-organism localization; cellu…	membrane; intracellular organelle; bounding membrane of organelle; organelle membrane; cytoplasm; intracellular organelle part; Golgi membrane; endomembrane system; intracellular part; cell; organelle part; intracellular membrane-bounded organelle; organelle; cell part; intracellular; Golgi apparatus part; membrane-bounded organelle; Golgi apparatus; cytoplasmic part;		K20353			IPR024468; IPR024298; IPR024340;	Sec16, N-terminal; Ancestral coatomer element 1, Sec16/Sec31; Sec16, central conserved domain;	[K]	KOG1913	Regucalcin gene promoter region-related protein (RGPR)
I8IN24	TPR repeat protein [Aspergillus oryzae 3.042]	0.295	Down	1.01518e-10	Ao3042_03068	82.108	80.099	30.3	17	21	17	nuclear			protein binding; binding;				IPR011990; IPR029058; IPR007751;	Tetratricopeptide-like helical domain; Alpha/Beta hydrolase fold; Domain of unknown function DUF676, lipase-like;
I8INF3		3.373	Up	0.0131889	Ao3042_02695	18.42	6.1435	5.6	1	4	1	nuclear	phosphorylation; nucleoside metabolic process; purine nucleoside metabolic process; cellular aromatic compound metabolic process; purine ribonucleoside monophosphate metabolic process; ATP synthesis coupled electron transport; ribonucleotide metabolic process; nucleotide metabolic process; single-organism process; respiratory electron transport chain; cellular metabolic process; phosphate-contain…		ubiquinol-cytochrome-c reductase activity; ion transmembrane transporter activity; oxidoreductase activity, acting on diphenols and related substances as donors; catalytic activity; substrate-specific transporter activity; monovalent inorganic cation transmembrane transporter activity; inorganic cation transmembrane transporter activity; hydrogen ion transmembrane transporter activity; cation tra…	K00416	QCR6; ubiquinol-cytochrome c reductase subunit 6	aor00190 Oxidative phosphorylation - Aspergillus oryzae; aor01100 Metabolic pathways - Aspergillus oryzae;	IPR023184;	Ubiquinol-cytochrome C reductase hinge domain;
I8INR4	"Phosphotransmitter protein Ypd1, putative"	0.543	Down	3.10112e-11	Ao3042_02600	18.406	61.737	54.2	13	31	13	nuclear	regulation of cellular process; single organism signaling; cellular response to stimulus; signal transduction; regulation of biological process; cell communication; intracellular signal transduction; single-organism cellular process; single-organism process; phosphorelay signal transduction system; signaling; response to stimulus; cellular process; biological regulation;		molecular transducer activity; signal transducer activity;	K11232	YPD1; osomolarity two-component system, phosphorelay intermediate protein YPD1	aor04011 MAPK signaling pathway - yeast - Aspergillus oryzae;	IPR008207;	Signal transduction histidine kinase, phosphotransfer (Hpt) domain;	[T]	KOG4747	Two-component phosphorelay intermediate involved in MAP kinase cascade regulation
I8INY8	Isopenicillin N synthase	0.531	Down	3.01e-05	Ao3042_02578	38.975	90.314	51.7	14	28	14	cytosol	single-organism process; metabolic process; oxidation-reduction process; single-organism metabolic process;		iron ion binding; transition metal ion binding; catalytic activity; binding; dioxygenase activity; ion binding; oxidoreductase activity, acting on paired donors, with incorporation or reduction of molecular oxygen; metal ion binding; cation binding; oxidoreductase activity, acting on paired donors, with incorporation or reduction of molecular oxygen, 2-oxoglutarate as one donor, and incorporation…				IPR027443; IPR005123; IPR026992;	Isopenicillin N synthase-like; Oxoglutarate/iron-dependent dioxygenase; Non-haem dioxygenase N-terminal domain;	[QR]	KOG0143	Iron/ascorbate family oxidoreductases
I8IP85	AAA+-type ATPase	0.259	Down	1.57489e-06	Ao3042_02418	47.953	43.764	21.7	9	14	9	cytosol			ATP binding; nucleoside phosphate binding; nucleoside binding; ion binding; hydrolase activity, acting on acid anhydrides; hydrolase activity; nucleotide binding; nucleoside-triphosphatase activity; organic cyclic compound binding; heterocyclic compound binding; ribonucleoside binding; carbohydrate derivative binding; pyrophosphatase activity; catalytic activity; ribonucleotide binding; binding; …	K12196	VPS4; vacuolar protein-sorting-associated protein 4	aor04144 Endocytosis - Aspergillus oryzae;	IPR003959; IPR003593; IPR015415; IPR027417; IPR007330;	ATPase, AAA-type, core; AAA+ ATPase domain; Vps4 oligomerisation, C-terminal; P-loop containing nucleoside triphosphate hydrolase; MIT;	[O]	KOG0739	AAA+-type ATPase
I8IPF0	Actin	0.172	Down	0.023816	Ao3042_02276	41.719	16.269	28	9	16	5	cytoskeleton		cytoskeleton; organelle; intracellular organelle; intracellular non-membrane-bounded organelle; cell part; intracellular; cytoplasm; intracellular part; cell; non-membrane-bounded organelle;	ATP binding; nucleoside phosphate binding; nucleoside binding; ion binding; nucleotide binding; organic cyclic compound binding; heterocyclic compound binding; ribonucleoside binding; carbohydrate derivative binding; ribonucleotide binding; binding; purine ribonucleoside binding; anion binding; purine ribonucleotide binding; adenyl ribonucleotide binding; adenyl nucleotide binding; purine nucleos…	K05692	ACTB_G1; actin beta/gamma 1	aor04145 Phagosome - Aspergillus oryzae;			[Z]	KOG0676	Actin and related proteins
I8IPX2	Cytoplasmic tryptophanyl-tRNA synthetase	0.399	Down	2.72e-11	Ao3042_02069	47.452	69.574	36.2	14	26	14	cytosol	cellular aromatic compound metabolic process; cellular protein metabolic process; single-organism process; biosynthetic process; tRNA aminoacylation; cellular metabolic process; organic substance metabolic process; metabolic process; cellular amino acid metabolic process; heterocycle metabolic process; nucleobase-containing compound metabolic process; cellular nitrogen compound metabolic process;…	intracellular part; cell; cell part; intracellular; cytoplasm;	tryptophan-tRNA ligase activity; ligase activity, forming aminoacyl-tRNA and related compounds; ATP binding; nucleoside phosphate binding; ligase activity, forming carbon-oxygen bonds; nucleoside binding; ion binding; ligase activity; nucleotide binding; organic cyclic compound binding; heterocyclic compound binding; ribonucleoside binding; carbohydrate derivative binding; ribonucleotide binding;…	K01867	WARS; tryptophanyl-tRNA synthetase [EC:6.1.1.2]	aor00970 Aminoacyl-tRNA biosynthesis - Aspergillus oryzae;	IPR014729;	Rossmann-like alpha/beta/alpha sandwich fold;	[J]	KOG2145	Cytoplasmic tryptophanyl-tRNA synthetase
I8IQ36	Polyketide synthase module	4.121	Up	3.24896e-12	Ao3042_02110	245.39	228.63	23.3	43	89	43	plasma membrane	metabolic process;		phosphopantetheine binding; vitamin binding; modified amino acid binding; catalytic activity; binding; ion binding; anion binding; amide binding; transferase activity; small molecule binding;				IPR032088; IPR014031; IPR016035; IPR014030; IPR014043; IPR020801; IPR020841; IPR016039; IPR020806; IPR016040; IPR009081; IPR001227; IPR016036; IPR013120;	Starter unit:ACP transacylase; Beta-ketoacyl synthase, C-terminal; Acyl transferase/acyl hydrolase/lysophospholipase; Beta-ketoacyl synthase, N-terminal; Acyl transferase; Polyketide synthase, acyl transferase domain; Polyketide synthase, beta-ketoacyl synthase domain; Thiolase-like; Polyketide synthase, phosphopantetheine-binding domain; NAD(P)-binding domain; Phosphopantetheine binding ACP doma…	[I]	KOG1202	Animal-type fatty acid synthase and related proteins
I8IQ71	Protein involved in Snf1 protein kinase complex assembly	0.624	Down	0.0250227	Ao3042_01966	49.299	23.372	11.5	4	5	4	nuclear			protein binding; kinase activity; catalytic activity; transferase activity; binding; transferase activity, transferring phosphorus-containing groups;				IPR014756; IPR006828; IPR032640;	Immunoglobulin E-set; Association with the SNF1 complex (ASC) domain; AMP-activated protein kinase, glycogen-binding domain;	[G]	KOG1616	Protein involved in Snf1 protein kinase complex assembly
I8IQ77	Actin	0.248	Down	3.24896e-12	Ao3042_01939	41.639	275.15	57.6	16	104	12	cytoskeleton		cytoskeleton; organelle; intracellular organelle; intracellular non-membrane-bounded organelle; cell part; intracellular; cytoplasm; intracellular part; cell; non-membrane-bounded organelle;	ATP binding; nucleoside phosphate binding; nucleoside binding; ion binding; nucleotide binding; organic cyclic compound binding; heterocyclic compound binding; ribonucleoside binding; carbohydrate derivative binding; ribonucleotide binding; binding; purine ribonucleoside binding; anion binding; purine ribonucleotide binding; adenyl ribonucleotide binding; adenyl nucleotide binding; purine nucleos…	K05692	ACTB_G1; actin beta/gamma 1	aor04145 Phagosome - Aspergillus oryzae;			[Z]	KOG0676	Actin and related proteins
I8IQF3		0.65	Down	0.0405671	Ao3042_01857	26.43	25.039	17.7	3	4	3	extracellular
I8IQK6	FAD dependent oxidoreductase superfamily	5.424	Up	3.84e-06	Ao3042_01874	21.535	24.203	39.7	7	14	7	cytosol	single-organism process; metabolic process; oxidation-reduction process; single-organism metabolic process;		catalytic activity; oxidoreductase activity;				IPR006076; IPR023753;	FAD dependent oxidoreductase; FAD/NAD(P)-binding domain;
I8IRI4	H+/oligopeptide symporter	5.133	Up	1.23356e-06	Ao3042_01475	66.305	43.862	12	8	19	8	plasma membrane	transport; localization; establishment of localization;	membrane;	transporter activity;				IPR020846;	Major facilitator superfamily domain;	[E]	KOG1237	H+/oligopeptide symporter
I8IRS5	"Alpha/beta hydrolase, putative"	0.512	Down	2.34328e-06	Ao3042_00818	27.884	54.827	25	7	14	7	plasma membrane			hydrolase activity; catalytic activity;				IPR029058; IPR000073;	Alpha/Beta hydrolase fold; Alpha/beta hydrolase fold-1;
I8IS24	"Transcription initiation factor IIF, auxiliary subunit"	0.472	Down	0.00217809	Ao3042_00667	24.871	45.437	26.9	6	15	6	nuclear	regulation of cellular process; regulation of gene expression; regulation of transcription, DNA-templated; regulation of cellular biosynthetic process; regulation of primary metabolic process; regulation of macromolecule metabolic process; regulation of nucleobase-containing compound metabolic process; regulation of macromolecule biosynthetic process; regulation of cellular metabolic process; reg…	organelle; intracellular membrane-bounded organelle; intracellular organelle; nucleus; cell part; intracellular; intracellular part; membrane-bounded organelle; cell;	organic cyclic compound binding; heterocyclic compound binding; RNA binding; translation factor activity, nucleic acid binding; binding; nucleic acid binding; translation initiation factor activity;	K03140	TAF14; transcription initiation factor TFIID/TFIIF subunit	aor03022 Basal transcription factors - Aspergillus oryzae;			[K]	KOG3149	Transcription initiation factor IIF, auxiliary subunit
I8ISB7		2.67	Up	1e-32	Ao3042_00557	48.172	99.476	50.6	17	33	17	cytosol
I8ISC7		0.564	Down	0.000129082	Ao3042_00483	27.026	49.519	42.6	6	12	6	mitochondria			protein binding; binding;	K20522			IPR001452;	SH3 domain;	[T]	KOG3601	Adaptor protein GRB2, contains SH2 and SH3 domains
I8ISD9		1.634	Up	0.000250481	Ao3042_00494	23.422	23.745	25.9	4	5	4	nuclear							IPR023393;	START-like domain;
I8IT01		0.23	Down	0.0274504	Ao3042_00276	15.259	49.208	49.6	10	18	10	nuclear
I8IT41	"17 beta-hydroxysteroid dehydrogenase type 3, HSD17B3 [Aspergillus oryzae 3.042]"	4.259	Up	0.0109161	Ao3042_00251	22.791	23.092	22	4	5	4	cytosol			catalytic activity; oxidoreductase activity;				IPR016040;	NAD(P)-binding domain;	[I]	KOG1014	17 beta-hydroxysteroid dehydrogenase type 3, HSD17B3
I8IU75	Thioredoxin	2.037	Up	1.9327e-06	Ao3042_11818	11.926	69.528	50.5	3	7	3	cytosol	regulation of cellular process; regulation of biological quality; cell redox homeostasis; small molecule metabolic process; single-organism cellular process; cellular homeostasis; ether metabolic process; single-organism process; organic substance metabolic process; homeostatic process; metabolic process; regulation of biological process; single-organism metabolic process; glycerol ether metaboli…		protein disulfide oxidoreductase activity; oxidoreductase activity, acting on a sulfur group of donors; disulfide oxidoreductase activity; catalytic activity; oxidoreductase activity;	K03671			IPR013766; IPR012336;	Thioredoxin domain; Thioredoxin-like fold;	[O]	KOG0907	Thioredoxin
I8IUW7		2.135	Up	1.90082e-09	Ao3042_11481	16.661	87.742	76.5	11	21	11	mitochondria				K18064			IPR001763;	Rhodanese-like domain;
I8IVJ0	"Vacuolar sorting protein VPS1, dynamin"	0.562	Down	0.000975223	Ao3042_11258	100.93	55.781	11	7	8	7	mitochondria			nucleoside phosphate binding; nucleoside binding; ion binding; hydrolase activity, acting on acid anhydrides; hydrolase activity; nucleotide binding; nucleoside-triphosphatase activity; organic cyclic compound binding; heterocyclic compound binding; ribonucleoside binding; carbohydrate derivative binding; pyrophosphatase activity; catalytic activity; ribonucleotide binding; binding; GTPase activi…				IPR030381; IPR027417; IPR001401; IPR020850; IPR000375;	Dynamin-type guanine nucleotide-binding (G) domain; P-loop containing nucleoside triphosphate hydrolase; Dynamin, GTPase domain; GTPase effector domain; Dynamin central domain;	[UR]	KOG0446	Vacuolar sorting protein VPS1, dynamin, and related proteins
I8IVN6	GPI anchored protein	7.164	Up	1.18974e-09	Ao3042_05145	94.46	61.693	17.8	10	28	10	extracellular
I8TE61	"Import inner membrane translocase, subunit TIM44"	0.377	Down	7.73825e-13	Ao3042_11316	56.629	110.2	33.1	14	24	14	mitochondria	establishment of protein localization; transport; intracellular transport; cellular macromolecule localization; establishment of localization in cell; intracellular protein transport; organic substance transport; protein localization; macromolecule localization; cellular protein localization; localization; protein transport; establishment of localization; cellular localization;	membrane; intracellular organelle; mitochondrial part; organelle membrane; organelle envelope; intracellular organelle part; cytoplasm; intracellular part; cell; organelle part; mitochondrion; mitochondrial envelope; intracellular membrane-bounded organelle; organelle; cell part; intracellular; envelope; organelle inner membrane; membrane-bounded organelle; mitochondrial inner membrane; mitochond…	active transmembrane transporter activity; P-P-bond-hydrolysis-driven transmembrane transporter activity; protein transporter activity; macromolecule transmembrane transporter activity; primary active transmembrane transporter activity; substrate-specific transporter activity; protein transmembrane transporter activity; P-P-bond-hydrolysis-driven protein transmembrane transporter activity; substr…	K17804			IPR007379; IPR032710;	Tim44-like domain; NTF2-like domain;	[U]	KOG2580	Mitochondrial import inner membrane translocase, subunit TIM44
I8TEN4	NmrA-like family protein [Aspergillus oryzae 3.042]	2.822	Up	3.66206e-05	Ao3042_01304	37.938	29.104	21.5	6	8	6	cytosol							IPR016040; IPR008030;	NAD(P)-binding domain; NmrA-like domain;
I8TES3	SNF2 family DNA-dependent ATPase domain-containing protein	0.641	Down	0.0211601	Ao3042_01009	210.56	68.216	10.8	17	22	17	cytosol			DNA binding; ATP binding; nucleoside phosphate binding; helicase activity; nucleoside binding; ion binding; hydrolase activity, acting on acid anhydrides; hydrolase activity; nucleotide binding; nucleoside-triphosphatase activity; heterocyclic compound binding; organic cyclic compound binding; ribonucleoside binding; carbohydrate derivative binding; pyrophosphatase activity; catalytic activity; r…	K15192			IPR011989; IPR027417; IPR014001; IPR001650; IPR016024; IPR022707; IPR000330;	Armadillo-like helical; P-loop containing nucleoside triphosphate hydrolase; Helicase superfamily 1/2, ATP-binding domain; Helicase, C-terminal; Armadillo-type fold; Domain of unknown function DUF3535; SNF2-related, N-terminal domain;	[K]	KOG0392	SNF2 family DNA-dependent ATPase domain-containing protein
I8TEW3	40S ribosomal protein S1	0.436	Down	5.74e-06	RPS1	28.547	316.94	55.2	16	56	16	nuclear	cellular protein metabolic process; biosynthetic process; primary metabolic process; cellular metabolic process; organic substance biosynthetic process; cellular biosynthetic process; organic substance metabolic process; metabolic process; cellular macromolecule biosynthetic process; cellular macromolecule metabolic process; gene expression; macromolecule metabolic process; protein metabolic proc…	ribosome; intracellular organelle; intracellular non-membrane-bounded organelle; small ribosomal subunit; intracellular organelle part; cytoplasm; macromolecular complex; intracellular part; cytosol; cell; organelle part; non-membrane-bounded organelle; organelle; ribosomal subunit; intracellular; cell part; cytosolic part; ribonucleoprotein complex; cytosolic small ribosomal subunit; cytoplasmic…	structural constituent of ribosome; structural molecule activity;	K02984	RP-S3Ae; small subunit ribosomal protein S3Ae	aor03010 Ribosome - Aspergillus oryzae;			[J]	KOG1628	40S ribosomal protein S3A
I8TEY2	putative kinase [Aspergillus oryzae 3.042]	1.869	Up	7.3546e-05	Ao3042_01175	37.412	13.495	17.7	5	6	5	cytosol			catalytic activity; transferase activity; transferase activity, transferring phosphorus-containing groups;				IPR011009;	Protein kinase-like domain;	[R]	KOG3021	Predicted kinase
I8TF21	FAD binding domain protein	0.609	Down	3.60742e-07	Ao3042_01387	45.07	82.125	30.4	11	20	11	cytosol	single-organism process; metabolic process; oxidation-reduction process; single-organism metabolic process;		organic cyclic compound binding; heterocyclic compound binding; nucleoside phosphate binding; flavin adenine dinucleotide binding; catalytic activity; binding; ion binding; anion binding; nucleotide binding; cofactor binding; oxidoreductase activity; small molecule binding; FAD binding; coenzyme binding;				IPR002938; IPR023753;	FAD-binding domain; FAD/NAD(P)-binding domain;
I8TFF5		0.604	Down	1.86556e-10	Ao3042_01112	45.02	50.087	28.2	10	14	10	mitochondria			intramolecular lyase activity; isomerase activity; catalytic activity;				IPR016087;	Chalcone isomerase;
I8TFK4		0.137	Down	0.0157211	Ao3042_01299	47.98	14.872	10	3	5	3	nuclear	heterocycle biosynthetic process; cellular aromatic compound metabolic process; nucleic acid-templated transcription; nucleobase-containing compound biosynthetic process; organic cyclic compound metabolic process; nitrogen compound metabolic process; RNA biosynthetic process; biosynthetic process; primary metabolic process; organic substance biosynthetic process; cellular metabolic process; cellu…	organelle; intracellular membrane-bounded organelle; intracellular organelle; nucleus; cell part; intracellular; intracellular part; membrane-bounded organelle; cell;	organic cyclic compound binding; heterocyclic compound binding; DNA binding; binding; nucleic acid binding;	K17498			IPR017923;	Transcription factor IIS, N-terminal;	[S]	KOG1793	Uncharacterized conserved protein
I8TG04	Metal-dependent amidase/aminoacylase/carboxypeptidase	2.444	Up	5.05021e-07	Ao3042_01211	44.919	22.789	19.2	7	9	7	cytosol	metabolic process;		carboxypeptidase activity; peptidase activity, acting on L-amino acid peptides; hydrolase activity; peptidase activity; exopeptidase activity; catalytic activity;				IPR011650;	Peptidase M20, dimerisation domain;
I8TGA8	MOT2 transcription factor	0.203	Down	2.04019e-08	Ao3042_10982	157.2	39.009	7.7	10	12	10	nuclear			organic cyclic compound binding; heterocyclic compound binding; nucleoside phosphate binding; transition metal ion binding; binding; nucleic acid binding; ion binding; metal ion binding; cation binding; protein binding; nucleotide binding; zinc ion binding; small molecule binding;	K10643	CNOT4; CCR4-NOT transcription complex subunit 4 [EC:2.3.2.27]	aor03018 RNA degradation - Aspergillus oryzae;	IPR000504; IPR001841; IPR013083; IPR012677; IPR003954;	RNA recognition motif domain; Zinc finger, RING-type; Zinc finger, RING/FYVE/PHD-type; Nucleotide-binding alpha-beta plait domain; RNA recognition motif domain, eukaryote;	[K]	KOG2068	MOT2 transcription factor
I8TGJ6		0.208	Down	2.24265e-13	Ao3042_10886	143.55	59.974	15	21	26	21	nuclear
I8TGT7	"Putative gamma-butyrobetaine,2-oxoglutarate dioxygenase"	0.578	Down	0.000247	Ao3042_11087	58.8	21.116	15.8	8	11	8	mitochondria	organic hydroxy compound metabolic process; organic acid biosynthetic process; single-organism biosynthetic process; oxidation-reduction process; small molecule metabolic process; single-organism cellular process; amino-acid betaine biosynthetic process; ammonium ion metabolic process; single-organism process; nitrogen compound metabolic process; biosynthetic process; organic hydroxy compound bio…		vitamin binding; iron ion binding; L-ascorbic acid binding; ion binding; organic acid binding; oxidoreductase activity, acting on paired donors, with incorporation or reduction of molecular oxygen; monosaccharide binding; oxidoreductase activity, acting on paired donors, with incorporation or reduction of molecular oxygen, 2-oxoglutarate as one donor, and incorporation of one atom each of oxygen …	K00474	TMLHE; trimethyllysine dioxygenase [EC:1.14.11.8]	aor00310 Lysine degradation - Aspergillus oryzae;	IPR010376; IPR003819;	Domain of unknown function DUF971; TauD/TfdA-like domain;
I8TH40	Alanine aminotransferase	1.743	Up	3.24873e-12	Ao3042_10783	54.829	170.5	34.5	14	36	14	mitochondria	biosynthetic process; metabolic process;		organic cyclic compound binding; heterocyclic compound binding; transferase activity, transferring nitrogenous groups; catalytic activity; binding; ion binding; anion binding; transaminase activity; transferase activity; cofactor binding; pyridoxal phosphate binding;	K00814	GPT; alanine transaminase [EC:2.6.1.2]	aor01200 Carbon metabolism - Aspergillus oryzae; aor01210 2-Oxocarboxylic acid metabolism - Aspergillus oryzae; aor00220 Arginine biosynthesis - Aspergillus oryzae; aor00250 Alanine, aspartate and glutamate metabolism - Aspergillus oryzae; aor01230 Biosynthesis of amino acids - Aspergillus oryzae; aor01100 Metabolic pathways - Aspergillus oryzae;	IPR004839; IPR015424; IPR015422; IPR015421;	Aminotransferase, class I/classII; Pyridoxal phosphate-dependent transferase; Pyridoxal phosphate-dependent transferase, major region, subdomain 2; Pyridoxal phosphate-dependent transferase, major region, subdomain 1;	[E]	KOG0258	Alanine aminotransferase
I8THB2	"26S proteasome regulatory complex, ATPase RPT5"	0.65	Down	4.11e-05	Ao3042_11086	51.465	208.62	59.1	25	64	25	nuclear	organic substance catabolic process; metabolic process; protein catabolic process; macromolecule catabolic process; macromolecule metabolic process; protein metabolic process; primary metabolic process; catabolic process; organic substance metabolic process;	proteasome complex; cell part; intracellular; cytoplasm; macromolecular complex; intracellular part; protein complex; cell;	ATP binding; nucleoside phosphate binding; nucleoside binding; ion binding; hydrolase activity, acting on acid anhydrides; hydrolase activity; nucleotide binding; nucleoside-triphosphatase activity; organic cyclic compound binding; heterocyclic compound binding; ribonucleoside binding; carbohydrate derivative binding; pyrophosphatase activity; catalytic activity; ribonucleotide binding; binding; …	K03065	PSMC3; 26S proteasome regulatory subunit T5	aor03050 Proteasome - Aspergillus oryzae;	IPR003593; IPR003959; IPR027417;	AAA+ ATPase domain; ATPase, AAA-type, core; P-loop containing nucleoside triphosphate hydrolase;	[O]	KOG0652	26S proteasome regulatory complex, ATPase RPT5
I8THC0		2.188	Up	0.0027661	Ao3042_10626	44.118	24.196	13.2	4	6	4	extracellular			protein binding; binding;				IPR015943;	WD40/YVTN repeat-like-containing domain;
I8THF9	"Import inner membrane translocase, subunit TIM17"	0.349	Down	0.000580901	Ao3042_10742	16.063	8.4269	22.1	4	5	4	plasma membrane		intrinsic component of membrane; membrane; integral component of membrane; membrane part;		K17795					[U]	KOG1652	Mitochondrial import inner membrane translocase, subunit TIM17
I8THJ4	Oxoprolinase	2.43	Up	3.20401e-06	Ao3042_10251	141.27	46.185	10.8	12	17	10	cytosol			hydrolase activity; catalytic activity;	K01469	OPLAH; 5-oxoprolinase (ATP-hydrolysing) [EC:3.5.2.9]	aor00480 Glutathione metabolism - Aspergillus oryzae;	IPR008040;	Hydantoinaseoxoprolinase, N-terminal;	[E]	KOG1939	Oxoprolinase
I8THX8		4.016	Up	5.88e-07	Ao3042_10709	35.236	65.251	33.4	9	12	7	cytosol							IPR016040; IPR008030;	NAD(P)-binding domain; NmrA-like domain;
I8THZ1	"Chaperonin complex component, TCP-1 epsilon subunit"	0.47	Down	1e-32	Ao3042_10756	59.861	180.88	54.4	30	60	30	cytosol	protein folding; metabolic process; cellular protein metabolic process; cellular macromolecule metabolic process; macromolecule metabolic process; protein metabolic process; primary metabolic process; cellular process; cellular metabolic process; organic substance metabolic process;	intracellular part; cell; cell part; intracellular; cytoplasm;	ATP binding; nucleoside phosphate binding; nucleoside binding; ion binding; protein binding; nucleotide binding; organic cyclic compound binding; heterocyclic compound binding; ribonucleoside binding; carbohydrate derivative binding; ribonucleotide binding; binding; purine ribonucleoside binding; anion binding; purine ribonucleotide binding; unfolded protein binding; adenyl ribonucleotide binding…	K09497			IPR027410; IPR027409; IPR027413;	TCP-1-like chaperonin intermediate domain; GroEL-like apical domain; GroEL-like equatorial domain;	[O]	KOG0357	Chaperonin complex component, TCP-1 epsilon subunit (CCT5)
I8TI80	Elongation factor 1 alpha	0.636	Down	0.00208	Ao3042_10696	62.304	49.074	20.7	8	11	8	cytosol			RNA binding; nucleoside phosphate binding; translation elongation factor activity; nucleoside binding; ion binding; hydrolase activity, acting on acid anhydrides; hydrolase activity; nucleotide binding; nucleoside-triphosphatase activity; heterocyclic compound binding; organic cyclic compound binding; translation factor activity, nucleic acid binding; ribonucleoside binding; carbohydrate derivati…	K14416	HBS1; elongation factor 1 alpha-like protein	aor03015 mRNA surveillance pathway - Aspergillus oryzae;	IPR015033; IPR004160; IPR005225; IPR009001; IPR027417; IPR000795; IPR009000;	HBS1-like protein, N-terminal; Translation elongation factor EFTu/EF1A, C-terminal; Small GTP-binding protein domain; Translation elongation factor EF1A/initiation factor IF2gamma, C-terminal; P-loop containing nucleoside triphosphate hydrolase; Transcription factor, GTP-binding domain; Translation protein, beta-barrel domain;	[J]	KOG0458	Elongation factor 1 alpha
I8TIT3		0.398	Down	0.00013803	Ao3042_10488	103.92	67.306	12.4	11	15	11	nuclear
I8TIX1		0.627	Down	0.00041337	Ao3042_10535	26.317	73.596	53.7	8	18	8	cytosol							IPR029058; IPR000073;	Alpha/Beta hydrolase fold; Alpha/beta hydrolase fold-1;
I8TJH4	Catalase	1.854	Up	3.85558e-12	Ao3042_09820	57.613	107.99	28.5	15	32	15	cytosol, nuclear	response to stress; oxidation-reduction process; single-organism catabolic process; single-organism cellular process; single-organism process; response to stimulus; cellular metabolic process; metabolic process; hydrogen peroxide metabolic process; reactive oxygen species metabolic process; single-organism metabolic process; response to oxidative stress; cellular catabolic process; hydrogen perox…		organic cyclic compound binding; heterocyclic compound binding; heme binding; catalytic activity; binding; ion binding; antioxidant activity; cation binding; metal ion binding; catalase activity; peroxidase activity; tetrapyrrole binding; oxidoreductase activity; oxidoreductase activity, acting on peroxide as acceptor;	K03781	katE; catalase [EC:1.11.1.6]	aor04011 MAPK signaling pathway - yeast - Aspergillus oryzae; aor01200 Carbon metabolism - Aspergillus oryzae; aor00630 Glyoxylate and dicarboxylate metabolism - Aspergillus oryzae; aor01110 Biosynthesis of secondary metabolites - Aspergillus oryzae; aor00380 Tryptophan metabolism - Aspergillus oryzae; aor01130 Biosynthesis of antibiotics - Aspergillus oryzae; aor04146 Peroxisome - Aspergillus or…	IPR020835; IPR011614; IPR010582;	Catalase-like domain; Catalase core domain; Catalase immune-responsive domain;	[P]	KOG0047	Catalase
I8TJJ6		4.109	Up	1.22673e-05	Ao3042_10168	41.502	100.37	30.7	6	14	6	extracellular			protein binding; binding;				IPR015943; IPR011045;	WD40/YVTN repeat-like-containing domain; Nitrous oxide reductase, N-terminal;
I8TK02	TPR repeat-containing protein	0.586	Down	0.000268059	Ao3042_10008	69.67	73.773	21.1	10	15	10	nuclear			protein binding; binding;	K13342	PEX5; peroxin-5	aor04146 Peroxisome - Aspergillus oryzae;	IPR011990; IPR013026;	Tetratricopeptide-like helical domain; Tetratricopeptide repeat-containing domain;	[R]	KOG1125	TPR repeat-containing protein
I8TKK8	Non-ribosomal peptide synthetase module	1.636	Up	7.18624e-05	Ao3042_09273	580.83	125.07	8.2	35	39	35	plasma membrane	metabolic process;		catalytic activity;				IPR001242; IPR009081; IPR010071; IPR000873;	Condensation domain; Phosphopantetheine binding ACP domain; Amino acid adenylation domain; AMP-dependent synthetase/ligase;	[Q]	KOG1178	Non-ribosomal peptide synthetase/alpha-aminoadipate reductase and related enzymes
I8TLC2	"Voltage-gated shaker-like K+ channel, subunit beta/KCNAB"	2.613	Up	4.90486e-08	Ao3042_09263	34.644	99.819	39.4	14	24	14	cytosol				K05275	E1.1.1.65; pyridoxine 4-dehydrogenase [EC:1.1.1.65]	aor00750 Vitamin B6 metabolism - Aspergillus oryzae; aor01100 Metabolic pathways - Aspergillus oryzae;	IPR023210;	NADP-dependent oxidoreductase domain;	[C]	KOG1575	Voltage-gated shaker-like K+ channel, subunit beta/KCNAB
I8TLE6	Myosin class II heavy chain	0.425	Down	0.0199	Ao3042_09367	232.74	24.019	4.1	9	9	9	nuclear
I8TLF5	Prolyl-tRNA synthetase	0.543	Down	0.02738	Ao3042_09314	70.691	17.282	8.5	5	5	5	mitochondria	cellular aromatic compound metabolic process; cellular protein metabolic process; single-organism process; biosynthetic process; tRNA aminoacylation; cellular metabolic process; organic substance metabolic process; metabolic process; cellular amino acid metabolic process; heterocycle metabolic process; nucleobase-containing compound metabolic process; cellular nitrogen compound metabolic process;…	intracellular part; cell; cell part; intracellular; cytoplasm;	ligase activity, forming aminoacyl-tRNA and related compounds; ATP binding; nucleoside phosphate binding; ligase activity, forming carbon-oxygen bonds; ligase activity; nucleoside binding; ion binding; nucleotide binding; proline-tRNA ligase activity; organic cyclic compound binding; heterocyclic compound binding; ribonucleoside binding; carbohydrate derivative binding; catalytic activity; ribonu…	K01881	PARS; prolyl-tRNA synthetase [EC:6.1.1.15]	aor00970 Aminoacyl-tRNA biosynthesis - Aspergillus oryzae;	IPR002314; IPR004154; IPR006195;	Aminoacyl-tRNA synthetase, class II (G/ P/ S/T); Anticodon-binding; Aminoacyl-tRNA synthetase, class II;	[J]	KOG2324	Prolyl-tRNA synthetase
I8TLG3	MAPKKK (MAP kinase kinase kinase) SSK2	0.542	Down	0.0437	Ao3042_09338	158.29	15.372	5.4	8	8	8	nuclear	regulation of cellular process; single organism signaling; cellular response to stress; phosphorylation; cellular protein metabolic process; single-organism process; response to stimulus; cellular metabolic process; stress-activated protein kinase signaling cascade; phosphate-containing compound metabolic process; organic substance metabolic process; signal transduction; metabolic process; cell c…	intracellular part; cell; cell part; intracellular; cytoplasm;	nucleoside phosphate binding; phosphotransferase activity, alcohol group as acceptor; protein kinase activity; receptor signaling protein serine/threonine kinase activity; signal transducer activity; heterocyclic compound binding; organic cyclic compound binding; kinase activity; ribonucleotide binding; catalytic activity; binding; purine ribonucleoside binding; anion binding; adenyl ribonucleoti…	K11230	SSK2; mitogen-activated protein kinase kinase kinase [EC:2.7.11.25]	aor04011 MAPK signaling pathway - yeast - Aspergillus oryzae;	IPR000719; IPR011009;	Protein kinase domain; Protein kinase-like domain;	[T]	KOG4645	MAPKKK (MAP kinase kinase kinase) SSK2 and related serine/threonine protein kinases
I8TLJ6		0.442	Down	1.43707e-05	Ao3042_09247	45.976	25.022	18.7	6	10	6	cytosol
I8TLN9	TATA-binding protein-interacting protein	0.235	Down	1.53951e-05	Ao3042_08821	113.14	46.373	12.4	12	17	12	cytosol			binding;	K17263			IPR011989; IPR016024; IPR013932;	Armadillo-like helical; Armadillo-type fold; TATA-binding protein interacting (TIP20);	[R]	KOG1824	TATA-binding protein-interacting protein
I8TLT9	Dipeptidase	2.804	Up	3.91e-11	Ao3042_08984	51.943	60.244	31.8	14	23	14	plasma membrane	proteolysis; metabolic process; macromolecule metabolic process; protein metabolic process; primary metabolic process; organic substance metabolic process;		exopeptidase activity; peptidase activity; catalytic activity; binding; ion binding; cation binding; metal ion binding; peptidase activity, acting on L-amino acid peptides; metallopeptidase activity; hydrolase activity; dipeptidase activity;	K01273			IPR032466;	Metal-dependent hydrolase;	[O]	KOG4127	Renal dipeptidase
I8TM95		0.342	Down	2.89836e-05	Ao3042_08793	49.09	55.096	24.9	9	12	9	extracellular	transport; intracellular transport; establishment of localization in cell; nuclear transport; nucleocytoplasmic transport; localization; cytoplasmic transport; establishment of localization; cellular localization;	intracellular organelle; membrane; nuclear pore; nuclear envelope; pore complex; intracellular organelle part; organelle envelope; macromolecular complex; intrinsic component of membrane; endomembrane system; intracellular part; cell; integral component of membrane; organelle part; intracellular membrane-bounded organelle; organelle; nucleus; intracellular; cell part; membrane part; envelope; pro…		K14307	NUPL1; nucleoporin p58/p45	aor03013 RNA transport - Aspergillus oryzae;			[YU]	KOG0845	Nuclear pore complex, Nup98 component (sc Nup145/Nup100/Nup116)
I8TME1	3-oxoacyl-[acyl-carrier protein] reductase	4.009	Up	0.00417546	Ao3042_08559	194.85	32.97	5.2	8	9	8	cytosol	single-organism biosynthetic process; organic acid biosynthetic process; small molecule metabolic process; single-organism cellular process; single-organism process; cellular lipid metabolic process; biosynthetic process; fatty acid metabolic process; primary metabolic process; cellular metabolic process; fatty acid biosynthetic process; organic substance biosynthetic process; cellular biosynthet…		magnesium ion binding; catalytic activity; binding; ion binding; metal ion binding; cation binding; phosphotransferase activity, for other substituted phosphate groups; transferase activity; holo-[acyl-carrier-protein] synthase activity; transferase activity, transferring phosphorus-containing groups;	K00667	FAS2; fatty acid synthase subunit alpha, fungi type [EC:2.3.1.86]	aor01212 Fatty acid metabolism - Aspergillus oryzae; aor00061 Fatty acid biosynthesis - Aspergillus oryzae; aor01100 Metabolic pathways - Aspergillus oryzae;	IPR016039; IPR016035; IPR014031; IPR001227; IPR016040; IPR014030; IPR008278; IPR004568;	Thiolase-like; Acyl transferase/acyl hydrolase/lysophospholipase; Beta-ketoacyl synthase, C-terminal; Acyl transferase domain; NAD(P)-binding domain; Beta-ketoacyl synthase, N-terminal; 4'-phosphopantetheinyl transferase superfamily; Phosphopantetheine-protein transferase domain;
I8TN11		1.989	Up	1.45706e-08	Ao3042_09214	30.808	62.695	29.8	8	12	8	extracellular	protein glycosylation; macromolecule glycosylation; glycoprotein biosynthetic process; single-organism cellular process; cellular protein metabolic process; glycoprotein metabolic process; single-organism process; biosynthetic process; primary metabolic process; carbohydrate metabolic process; cellular metabolic process; organic substance biosynthetic process; cellular biosynthetic process; organ…	membrane; intracellular organelle; endoplasmic reticulum; nuclear outer membrane-endoplasmic reticulum membrane network; bounding membrane of organelle; organelle membrane; cytoplasm; intracellular organelle part; intrinsic component of membrane; endomembrane system; macromolecular complex; intracellular part; oligosaccharyltransferase complex; transferase complex; cell; integral component of mem…		K12667	SWP1; oligosaccharyltransferase complex subunit delta (ribophorin II)	aor00510 N-Glycan biosynthesis - Aspergillus oryzae; aor04141 Protein processing in endoplasmic reticulum - Aspergillus oryzae; aor00513 Various types of N-glycan biosynthesis - Aspergillus oryzae; aor01100 Metabolic pathways - Aspergillus oryzae;			[O]	KOG2447	Oligosaccharyltransferase, delta subunit (ribophorin II)
I8TNH9	Ubiquitin carboxyl-terminal hydrolase	0.447	Down	0.00835754	Ao3042_08528	26.49	38.052	10	2	3	2	cytosol	modification-dependent macromolecule catabolic process; cellular macromolecule catabolic process; proteolysis involved in cellular protein catabolic process; cellular protein catabolic process; modification-dependent protein catabolic process; cellular protein metabolic process; ubiquitin-dependent protein catabolic process; primary metabolic process; cellular metabolic process; organic substance…	cell; intracellular; cell part;	ubiquitin-specific protease activity; peptidase activity; ubiquitinyl hydrolase activity; catalytic activity; peptidase activity, acting on L-amino acid peptides; ubiquitin-like protein-specific protease activity; cysteine-type peptidase activity; hydrolase activity;	K05609			IPR001578;	Peptidase C12, ubiquitin carboxyl-terminal hydrolase;	[O]	KOG1415	Ubiquitin C-terminal hydrolase UCHL1
I8TNI3	Sortilin	1.98	Up	1e-32	Ao3042_08111	165.7	173.04	26.9	33	49	33	extracellular	transport; localization; establishment of localization;	membrane; intracellular organelle; cytoplasm; intrinsic component of membrane; endomembrane system; intracellular part; cell; integral component of membrane; intracellular membrane-bounded organelle; organelle; intracellular; cell part; membrane part; Golgi apparatus; membrane-bounded organelle; cytoplasmic part;					IPR011040; IPR031778; IPR031777; IPR006581;	Sialidases; Sortilin, N-terminal; Sortilin, C-terminal; VPS10;	[R]	KOG3511	Sortilin and related receptors
I8TNK3	cytochrome protein [Aspergillus oryzae 3.042]	2.226	Up	0.0381	Ao3042_08200	54.316	34.065	11.2	3	5	3	mitochondria	single-organism process; metabolic process; oxidation-reduction process; single-organism metabolic process;		organic cyclic compound binding; heterocyclic compound binding; heme binding; iron ion binding; transition metal ion binding; catalytic activity; binding; ion binding; cation binding; metal ion binding; oxidoreductase activity, acting on paired donors, with incorporation or reduction of molecular oxygen; monooxygenase activity; tetrapyrrole binding; oxidoreductase activity;						[Q]	KOG0156	Cytochrome P450 CYP2 subfamily
I8TNS9	"2,4-dihydroxyhept-2-ene-1,7-dioic acid aldolase"	5.017	Up	1.77471e-09	Ao3042_08428	24.981	25.662	21.8	5	10	5	cytosol	metabolic process; cellular aromatic compound metabolic process; cellular metabolic process; cellular process;		lyase activity; catalytic activity; carbon-carbon lyase activity;	K02510	hpaI; 4-hydroxy-2-oxoheptanedioate aldolase [EC:4.1.2.52]	aor00350 Tyrosine metabolism - Aspergillus oryzae;	IPR015813; IPR005000;	Pyruvate/Phosphoenolpyruvate kinase-like domain; HpcH/HpaI aldolase/citrate lyase domain;
I8TNX7	Putative taurine catabolism dioxygenase	7.079	Up	3.24873e-12	Ao3042_08562	38.315	167.85	59.2	18	46	18	nuclear	single-organism process; metabolic process; oxidation-reduction process; single-organism metabolic process;		catalytic activity; dioxygenase activity; oxidoreductase activity;				IPR003819;	TauD/TfdA-like domain;
I8TNY0	Thioredoxin	0.387	Down	0.0276	Ao3042_08188	25.527	12.635	14.7	3	4	3	cytosol			protein disulfide oxidoreductase activity; oxidoreductase activity, acting on a sulfur group of donors; disulfide oxidoreductase activity; catalytic activity; oxidoreductase activity;				IPR001853; IPR012336;	DSBA-like thioredoxin domain; Thioredoxin-like fold;
I8TNZ0		3.253	Up	3.24896e-12	Ao3042_07976	14.609	86.939	92.6	11	38	11	cytosol	metabolic process;		lyase activity; carbon-sulfur lyase activity; catalytic activity;				IPR006913; IPR011057;	Glutathione-dependent formaldehyde-activating enzyme/centromere protein V; Mss4-like;
I8TP16	Peptide hydrolase	1.989	Up	1.70716e-08	Ao3042_07813	54.214	96.145	28.6	8	19	8	cytosol			peptidase activity; hydrolase activity; catalytic activity;	K01264			IPR003137; IPR007484;	PA domain; Peptidase M28;	[OPR]	KOG2195	Transferrin receptor and related proteins containing the protease-associated (PA) domain
I8TP91	CipC-like antibiotic stress responsive protein	0.626	Down	0.0475943	Ao3042_08542	11.998	62.133	74.8	6	18	6	cytosol, nuclear
I8TPJ1	Threonine aldolase	1.61	Up	1.5574e-07	Ao3042_08053	44.664	64.594	35.6	13	19	13	mitochondria	small molecule metabolic process; single-organism cellular process; nitrogen compound metabolic process; single-organism process; primary metabolic process; cellular metabolic process; organic substance metabolic process; metabolic process; cellular amino acid metabolic process; single-organism metabolic process; carboxylic acid metabolic process; organic acid metabolic process; cellular process;…		organic cyclic compound binding; heterocyclic compound binding; catalytic activity; binding; ion binding; lyase activity; anion binding; cofactor binding; pyridoxal phosphate binding;	K01620	ltaE; threonine aldolase [EC:4.1.2.48]	aor00260 Glycine, serine and threonine metabolism - Aspergillus oryzae; aor01110 Biosynthesis of secondary metabolites - Aspergillus oryzae; aor01130 Biosynthesis of antibiotics - Aspergillus oryzae; aor01230 Biosynthesis of amino acids - Aspergillus oryzae; aor01100 Metabolic pathways - Aspergillus oryzae;	IPR015424; IPR001597; IPR015422; IPR015421;	Pyridoxal phosphate-dependent transferase; Aromatic amino acid beta-eliminating lyase/threonine aldolase; Pyridoxal phosphate-dependent transferase, major region, subdomain 2; Pyridoxal phosphate-dependent transferase, major region, subdomain 1;	[E]	KOG1368	Threonine aldolase
I8TPM1		1.613	Up	0.0332647	Ao3042_07870	51.741	58.81	14.4	5	5	5	nuclear			metal ion binding; cation binding; binding; ion binding;				IPR000571;	Zinc finger, CCCH-type;
I8TQS0	"26S proteasome regulatory complex, ATPase RPT3"	0.392	Down	1.00808e-13	Ao3042_07044	47.124	141.38	49.1	17	39	16	nuclear	organic substance catabolic process; metabolic process; protein catabolic process; macromolecule catabolic process; macromolecule metabolic process; protein metabolic process; primary metabolic process; catabolic process; organic substance metabolic process;	proteasome complex; cell part; intracellular; cytoplasm; macromolecular complex; intracellular part; protein complex; cell;	ATP binding; nucleoside phosphate binding; nucleoside binding; ion binding; hydrolase activity, acting on acid anhydrides; hydrolase activity; nucleotide binding; nucleoside-triphosphatase activity; organic cyclic compound binding; heterocyclic compound binding; ribonucleoside binding; carbohydrate derivative binding; pyrophosphatase activity; catalytic activity; ribonucleotide binding; binding; …	K03063	PSMC4; 26S proteasome regulatory subunit T3	aor03050 Proteasome - Aspergillus oryzae;	IPR003959; IPR003593; IPR027417;	ATPase, AAA-type, core; AAA+ ATPase domain; P-loop containing nucleoside triphosphate hydrolase;	[O]	KOG0727	26S proteasome regulatory complex, ATPase RPT3
I8TQX0	RanBP1 domain protein	0.616	Down	0.00023295	Ao3042_07253	147.87	21.242	4.9	6	7	6	nuclear	transport; intracellular transport; establishment of localization in cell; localization; establishment of localization; cellular localization;						IPR000156; IPR011993;	Ran binding domain; PH domain-like;	[U]	KOG0866	Ran-binding protein RANBP3
I8TQZ9	Pterin-4-alpha-carbinolamine dehydratase	0.579	Down	4.84e-05	Ao3042_07146	34.93	107.56	51.9	13	34	13	mitochondria	cofactor biosynthetic process; pteridine-containing compound biosynthetic process; nucleoside metabolic process; cellular aromatic compound metabolic process; single-organism process; biosynthetic process; organonitrogen compound biosynthetic process; cellular metabolic process; organic substance metabolic process; metabolic process; heterocycle metabolic process; aromatic compound biosynthetic p…		lyase activity; hydro-lyase activity; 4-alpha-hydroxytetrahydrobiopterin dehydratase activity; catalytic activity; carbon-oxygen lyase activity;				IPR000836; IPR029057;	Phosphoribosyltransferase domain; Phosphoribosyltransferase-like;	[K]	KOG4073	Pterin carbinolamine dehydratase PCBD/dimerization cofactor of HNF1
I8TR08		0.555	Down	0.000149688	Ao3042_07126	57.405	51.597	26.5	14	17	14	nuclear
I8TR27	Extracellular protein SEL-1	1.618	Up	0.00317757	Ao3042_07217	93.488	35.994	8.7	6	7	6	extracellular			protein binding; binding;	K14026	SEL1; SEL1 protein	aor04141 Protein processing in endoplasmic reticulum - Aspergillus oryzae;	IPR011990;	Tetratricopeptide-like helical domain;	[MOT]	KOG1550	Extracellular protein SEL-1 and related proteins
I8TR67		0.439	Down	0.0275	Ao3042_07154	27.841	3.7429	12.1	3	3	3	nuclear	cellular component organization; single-organism organelle organization; mitotic cell cycle; organelle organization; mitotic nuclear division; organelle fission; single-organism cellular process; nuclear division; single-organism process; cell cycle process; cellular process; mitotic cell cycle process; cell cycle; cellular component organization or biogenesis;	DASH complex; macromolecular complex; intracellular part; cell; condensed chromosome outer kinetochore; condensed chromosome kinetochore; organelle part; chromosomal part; non-membrane-bounded organelle; condensed chromosome; membrane-enclosed lumen; mitotic spindle; cytoskeleton; intracellular organelle lumen; microtubule cytoskeleton; nuclear chromosome part; cell part; intracellular; chromosom…
I8TRC0	Putative hydrolases or acyltransferase	2.072	Up	0.000177704	Ao3042_07132	34.547	38.244	32.8	9	18	9	cytosol			hydrolase activity; transferase activity, transferring acyl groups; catalytic activity; transferase activity;				IPR029058;	Alpha/Beta hydrolase fold;	[R]	KOG4840	Predicted hydrolases or acyltransferases (alpha/beta hydrolase superfamily)
I8TRC5	Peroxidase/oxygenase	2.86	Up	0.00110581	Ao3042_06970	125.33	58.083	11.4	10	13	10	nuclear	metabolic process; response to stress; oxidation-reduction process; single-organism metabolic process; response to oxidative stress; single-organism process; response to stimulus;		organic cyclic compound binding; heterocyclic compound binding; heme binding; iron ion binding; transition metal ion binding; catalytic activity; binding; ion binding; antioxidant activity; cation binding; metal ion binding; oxidoreductase activity, acting on paired donors, with incorporation or reduction of molecular oxygen; peroxidase activity; tetrapyrrole binding; oxidoreductase activity, act…	K17862	PPOC; linoleate 10R-lipoxygenase [EC:1.13.11.62]	aor00591 Linoleic acid metabolism - Aspergillus oryzae;			[R]	KOG2408	Peroxidase/oxygenase
I8TRF9	"Ccr4-Not transcription complex subunit (NOT1), putative"	0.587	Down	4.77874e-09	Ao3042_07158	260.9	171.14	18	37	50	37	nuclear				K12604	CNOT1; CCR4-NOT transcription complex subunit 1	aor03018 RNA degradation - Aspergillus oryzae;	IPR032193; IPR032191; IPR007196; IPR032194; IPR024557;	CCR4-NOT transcription complex subunit 1, TTP binding domain; CCR4-NOT transcription complex subunit 1, CAF1-binding domain; CCR4-Not complex component, Not1, C-terminal; CCR4-NOT transcription complex subunit 1, HEAT repeat; CCR4-Not complex, Not1 subunit, domain of unknown function DUF3819;	[K]	KOG1831	Negative regulator of transcription
I8TRR3	Galactokinase	0.654	Down	3.30269e-12	Ao3042_07150	57.866	323.31	43.7	23	63	23	cytosol	phosphorylation; single-organism process; carbohydrate metabolic process; primary metabolic process; cellular metabolic process; phosphate-containing compound metabolic process; organic substance metabolic process; single-organism carbohydrate metabolic process; metabolic process; cellular carbohydrate metabolic process; phosphorus metabolic process; single-organism metabolic process; carbohydrat…	intracellular part; cell; cell part; intracellular; cytoplasm;	ATP binding; nucleoside phosphate binding; phosphotransferase activity, alcohol group as acceptor; nucleoside binding; ion binding; nucleotide binding; organic cyclic compound binding; heterocyclic compound binding; ribonucleoside binding; carbohydrate kinase activity; carbohydrate derivative binding; kinase activity; catalytic activity; ribonucleotide binding; binding; purine ribonucleoside bind…	K00849	galK; galactokinase [EC:2.7.1.6]	aor00052 Galactose metabolism - Aspergillus oryzae; aor00520 Amino sugar and nucleotide sugar metabolism - Aspergillus oryzae; aor01100 Metabolic pathways - Aspergillus oryzae;	IPR019539; IPR020568; IPR006204; IPR014721; IPR013750;	Galactokinase galactose-binding domain; Ribosomal protein S5 domain 2-type fold; GHMP kinase N-terminal domain; Ribosomal protein S5 domain 2-type fold, subgroup; GHMP kinase, C-terminal domain;	[G]	KOG0631	Galactokinase
I8TRT1	Catalase	8.344	Up	4.17e-05	Ao3042_07316	55.95	13.644	4.6	2	2	2	peroxisome	metabolic process; response to stress; oxidation-reduction process; single-organism metabolic process; response to oxidative stress; single-organism process; response to stimulus;		organic cyclic compound binding; heterocyclic compound binding; heme binding; catalytic activity; binding; ion binding; antioxidant activity; cation binding; metal ion binding; catalase activity; peroxidase activity; tetrapyrrole binding; oxidoreductase activity; oxidoreductase activity, acting on peroxide as acceptor;	K03781	katE; catalase [EC:1.11.1.6]	aor04011 MAPK signaling pathway - yeast - Aspergillus oryzae; aor01200 Carbon metabolism - Aspergillus oryzae; aor00630 Glyoxylate and dicarboxylate metabolism - Aspergillus oryzae; aor01110 Biosynthesis of secondary metabolites - Aspergillus oryzae; aor00380 Tryptophan metabolism - Aspergillus oryzae; aor01130 Biosynthesis of antibiotics - Aspergillus oryzae; aor04146 Peroxisome - Aspergillus or…	IPR020835; IPR011614; IPR010582;	Catalase-like domain; Catalase core domain; Catalase immune-responsive domain;	[P]	KOG0047	Catalase
I8TS10		1.866	Up	2.59842e-05	Ao3042_06743	101.77	37.252	11.3	9	15	9	cytosol							IPR027443;	Isopenicillin N synthase-like;
I8TS21	Chitinase	0.586	Down	6.24e-08	Ao3042_07055	46.002	89.661	22.6	5	13	5	mitochondria	glucosamine-containing compound metabolic process; chitin metabolic process; aminoglycan catabolic process; carbohydrate derivative catabolic process; nitrogen compound metabolic process; chitin catabolic process; carbohydrate metabolic process; primary metabolic process; glucosamine-containing compound catabolic process; organic substance metabolic process; organic substance catabolic process; m…		hydrolase activity, hydrolyzing O-glycosyl compounds; hydrolase activity; chitinase activity; catalytic activity; hydrolase activity, acting on glycosyl bonds;	K01183	E3.2.1.14; chitinase [EC:3.2.1.14]	aor00520 Amino sugar and nucleotide sugar metabolism - Aspergillus oryzae; aor01100 Metabolic pathways - Aspergillus oryzae;	IPR001223; IPR011583; IPR029070; IPR017853; IPR013781;	Glycoside hydrolase family 18, catalytic domain; Chitinase II; Chitinase insertion domain; Glycoside hydrolase superfamily; Glycoside hydrolase, catalytic domain;	[G]	KOG2806	Chitinase
I8TS80	2-polyprenyl-6-methoxyphenol hydroxylase	5.909	Up	1e-32	Ao3042_06915	67.778	115.2	35.9	18	31	18	cytoskeleton	single-organism process; metabolic process; oxidation-reduction process; single-organism metabolic process;		organic cyclic compound binding; heterocyclic compound binding; nucleoside phosphate binding; flavin adenine dinucleotide binding; catalytic activity; binding; ion binding; anion binding; nucleotide binding; cofactor binding; oxidoreductase activity; small molecule binding; FAD binding; coenzyme binding;				IPR002938; IPR012941; IPR012336; IPR023753;	FAD-binding domain; Phenol hydroxylase, C-terminal dimerisation domain; Thioredoxin-like fold; FAD/NAD(P)-binding domain;	[HC]	KOG3855	Monooxygenase involved in coenzyme Q (ubiquinone) biosynthesis
I8TSF6	Transport protein particle (TRAPP) complex subunit	1.637	Up	1.16818e-06	Ao3042_06447	21.709	4.3362	7.9	2	5	2	cytosol, nuclear	transport; intracellular transport; establishment of localization in cell; single-organism localization; vesicle-mediated transport; single-organism process; Golgi vesicle transport; localization; single-organism intracellular transport; single-organism transport; establishment of localization; cellular localization;	cell part; intracellular; TRAPP complex; macromolecular complex; intracellular part; protein complex; cell;		K20302			IPR024096;	NO signalling/Golgi transport ligand-binding domain;	[U]	KOG3330	Transport protein particle (TRAPP) complex subunit
I8TSP8		0.241	Down	2.4688e-10	Ao3042_06753	12.743	48.526	44.5	4	14	4	extracellular				K09481	SEC61B; protein transport protein SEC61 subunit beta	aor04141 Protein processing in endoplasmic reticulum - Aspergillus oryzae; aor03060 Protein export - Aspergillus oryzae; aor04145 Phagosome - Aspergillus oryzae;			[O]	KOG3457	Sec61 protein translocation complex, beta subunit
I8TSS2	Karyopherin (Importin) beta 3	0.648	Down	1.36e-07	Ao3042_06562	121.08	165.44	34.5	31	46	31	cytosol	establishment of protein localization; transport; intracellular transport; cellular macromolecule localization; establishment of localization in cell; intracellular protein transport; organic substance transport; protein localization; macromolecule localization; cellular protein localization; localization; protein transport; establishment of localization; cellular localization;	organelle; intracellular membrane-bounded organelle; intracellular organelle; nucleus; cell part; intracellular; intracellular part; membrane-bounded organelle; cell;	small GTPase binding; Ras GTPase binding; binding; protein binding; Ran GTPase binding; GTPase binding; enzyme binding;	K20221			IPR001494; IPR011989; IPR016024;	Importin-beta, N-terminal domain; Armadillo-like helical; Armadillo-type fold;	[YU]	KOG2171	Karyopherin (importin) beta 3
I8TSY0	Putative glutathione S-transferase	3.361	Up	6.47837e-12	Ao3042_06404	38.961	85.349	42.6	14	19	14	cytosol			protein binding; transferase activity; catalytic activity; binding;	K07393			IPR010987; IPR004045; IPR012336;	Glutathione S-transferase, C-terminal-like; Glutathione S-transferase, N-terminal; Thioredoxin-like fold;	[O]	KOG2903	Predicted glutathione S-transferase
I8TT33	FAD binding domain protein	2.313	Up	0.00989	Ao3042_06326	62.036	7.9518	4.1	2	5	2	extracellular	single-organism process; metabolic process; oxidation-reduction process; single-organism metabolic process;		UDP-N-acetylmuramate dehydrogenase activity; nucleoside phosphate binding; flavin adenine dinucleotide binding; ion binding; nucleotide binding; cofactor binding; oxidoreductase activity; oxidoreductase activity, acting on CH-OH group of donors; heterocyclic compound binding; organic cyclic compound binding; oxidoreductase activity, acting on the CH-OH group of donors, NAD or NADP as acceptor; ca…				IPR016166; IPR016169; IPR012951; IPR006094;	FAD-binding, type 2; CO dehydrogenase flavoprotein-like, FAD-binding, subdomain 2; Berberine/berberine-like; FAD linked oxidase, N-terminal;
I8TT58	Nuclear pore complex protein	0.661	Down	2.51e-05	Ao3042_06216	150.72	63.504	14.3	16	26	16	plasma membrane	transport; intracellular transport; establishment of localization in cell; nuclear transport; nucleocytoplasmic transport; localization; cytoplasmic transport; establishment of localization; cellular localization;	intracellular organelle; membrane; nuclear pore; nuclear envelope; pore complex; intracellular organelle part; organelle envelope; macromolecular complex; intrinsic component of membrane; endomembrane system; intracellular part; cell; integral component of membrane; organelle part; intracellular membrane-bounded organelle; organelle; nucleus; intracellular; cell part; membrane part; envelope; pro…	structural constituent of nuclear pore; structural molecule activity;	K14312	NUP155; nuclear pore complex protein Nup155	aor03013 RNA transport - Aspergillus oryzae;	IPR014908; IPR007187; IPR011047;	Nucleoporin, Nup133/Nup155-like, N-terminal; Nucleoporin, Nup133/Nup155-like, C-terminal; Quinoprotein alcohol dehydrogenase-like superfamily;	[YU]	KOG1900	Nuclear pore complex, Nup155 component (D Nup154, sc Nup157/Nup170)
I8TT75	Nuclear transport regulator	0.626	Down	1.93018e-05	Ao3042_06219	108.59	105.43	21.4	17	21	17	cytosol	establishment of protein localization; transport; intracellular transport; cellular macromolecule localization; establishment of localization in cell; intracellular protein transport; organic substance transport; protein localization; macromolecule localization; cellular protein localization; localization; protein transport; establishment of localization; cellular localization;	organelle; intracellular membrane-bounded organelle; intracellular organelle; nucleus; cell part; intracellular; intracellular part; membrane-bounded organelle; cell;	small GTPase binding; Ras GTPase binding; binding; protein binding; Ran GTPase binding; GTPase binding; enzyme binding;	K15436			IPR001494; IPR011989; IPR013598; IPR016024;	Importin-beta, N-terminal domain; Armadillo-like helical; Exportin-1/Importin-beta-like; Armadillo-type fold;	[U]	KOG2081	Nuclear transport regulator
I8TTE5		2.894	Up	1.55584e-09	Ao3042_06190	17.337	30.452	34.2	6	16	6	nuclear
I8TTF2	"Maltase glucoamylase, glycosyl hydrolase family 31"	2.271	Up	3.24896e-12	Ao3042_06557	106.24	154.18	30.6	28	62	28	extracellular	metabolic process; carbohydrate metabolic process; primary metabolic process; organic substance metabolic process;		carbohydrate binding; hydrolase activity, hydrolyzing O-glycosyl compounds; hydrolase activity; catalytic activity; binding; hydrolase activity, acting on glycosyl bonds;	K01187	malZ; alpha-glucosidase [EC:3.2.1.20]	aor00052 Galactose metabolism - Aspergillus oryzae; aor00500 Starch and sucrose metabolism - Aspergillus oryzae; aor01100 Metabolic pathways - Aspergillus oryzae;	IPR011013; IPR031727; IPR025887; IPR017853;	Galactose mutarotase-like domain; Galactose mutarotase, N-terminal barrel; Glycoside hydrolase family 31, N-terminal domain; Glycoside hydrolase superfamily;	[G]	KOG1065	Maltase glucoamylase and related hydrolases, glycosyl hydrolase family 31
I8TTH6	Putative nucleoside-diphosphate-sugar epimerase	3.055	Up	1.64e-05	Ao3042_06160	34.527	49.189	36.9	10	13	10	cytosol							IPR016040; IPR008030;	NAD(P)-binding domain; NmrA-like domain;
I8TTL6	Ca2+/H+ antiporter VCX1	0.229	Down	0.000841782	Ao3042_06003	122.87	22.412	5.4	5	7	5	plasma membrane	transport; transmembrane transport; single-organism localization; single-organism cellular process; single-organism process; localization; cellular process; single-organism transport; establishment of localization;	intrinsic component of membrane; membrane; integral component of membrane; membrane part;		K07300			IPR004837; IPR005185;	Sodium/calcium exchanger membrane region; Inner membrane component domain;	[P]	KOG1397	Ca2+/H+ antiporter VCX1 and related proteins
I8TTN6		0.33	Down	9.59608e-08	Ao3042_05988	73.951	35.263	19.9	10	16	10	nuclear				K18158
I8TTP7	Cullin protein	0.339	Down	1.08892e-08	Ao3042_05997	116.58	52.862	16.9	16	23	16	mitochondria	transport; localization; establishment of localization;	intracellular organelle; membrane; nuclear pore; nuclear envelope; pore complex; intracellular organelle part; organelle envelope; macromolecular complex; intrinsic component of membrane; endomembrane system; intracellular part; cell; integral component of membrane; organelle part; intracellular membrane-bounded organelle; organelle; nucleus; intracellular; cell part; membrane part; envelope; pro…		K14309	NUP93; nuclear pore complex protein Nup93	aor03013 RNA transport - Aspergillus oryzae;			[D]	KOG2168	Cullins
I8TTR1	Septin family protein	0.594	Down	3.28582e-12	Ao3042_06298	52.343	182.28	47.9	18	38	18	nuclear	single-organism cellular process; single-organism process; cellular process; cell cycle;	intracellular organelle; cell cortex; intracellular non-membrane-bounded organelle; cytoskeletal part; cell periphery; intracellular organelle part; cytoplasm; macromolecular complex; intracellular part; cell; organelle part; non-membrane-bounded organelle; organelle; cytoskeleton; intracellular; cell part; cell cortex part; septin cytoskeleton; septin complex; protein complex; cytoplasmic part;	nucleoside phosphate binding; nucleoside binding; ion binding; nucleotide binding; organic cyclic compound binding; heterocyclic compound binding; ribonucleoside binding; carbohydrate derivative binding; ribonucleotide binding; binding; purine ribonucleoside binding; anion binding; purine ribonucleotide binding; purine nucleoside binding; guanyl ribonucleotide binding; guanyl nucleotide binding; …	K16944			IPR027417; IPR030379;	P-loop containing nucleoside triphosphate hydrolase; Septin-type guanine nucleotide-binding (G) domain;	[DZU]	KOG2655	Septin family protein (P-loop GTPase)
I8TTW9	Guanine nucleotide exchange factor	0.498	Down	2.4706e-08	Ao3042_06245	224.5	112.22	12.2	20	30	20	nuclear	regulation of cellular process; regulation of biological process; regulation of cell communication; regulation of intracellular signal transduction; regulation of signaling; regulation of response to stimulus; regulation of Ras protein signal transduction; regulation of ARF protein signal transduction; regulation of signal transduction; regulation of small GTPase mediated signal transduction; bio…		molecular function regulator; ARF guanyl-nucleotide exchange factor activity; guanyl-nucleotide exchange factor activity; binding;	K18442	ARFGEF; brefeldin A-inhibited guanine nucleotide-exchange protein	aor04144 Endocytosis - Aspergillus oryzae;	IPR023394; IPR032691; IPR000904; IPR032629; IPR016024; IPR015403;	Sec7 domain, alpha orthogonal bundle; Guanine nucleotide exchange factor, N-terminal; Sec7 domain; Mon2, dimerisation and cyclophilin-binding domain; Armadillo-type fold; Sec7, C-terminal;	[U]	KOG0929	Guanine nucleotide exchange factor
I8TU51		0.496	Down	0.000232	Ao3042_06125	35.676	84.645	43.6	9	15	9	mitochondria							IPR016040;	NAD(P)-binding domain;
I8TUB2		0.317	Down	0.000774587	Ao3042_05925	29.31	16.767	16.6	4	8	4	nuclear
I8TUN3	Ribose 5-phosphate isomerase RpiB	0.381	Down	6.88338e-14	Ao3042_05664	17.23	108.16	57.4	9	37	9	cytosol	metabolic process; carbohydrate metabolic process; primary metabolic process; organic substance metabolic process;		intramolecular oxidoreductase activity; isomerase activity; ribose-5-phosphate isomerase activity; catalytic activity; intramolecular oxidoreductase activity, interconverting aldoses and ketoses;	K01808	rpiB; ribose 5-phosphate isomerase B [EC:5.3.1.6]	aor00030 Pentose phosphate pathway - Aspergillus oryzae; aor01200 Carbon metabolism - Aspergillus oryzae; aor01110 Biosynthesis of secondary metabolites - Aspergillus oryzae; aor01130 Biosynthesis of antibiotics - Aspergillus oryzae; aor01230 Biosynthesis of amino acids - Aspergillus oryzae; aor00051 Fructose and mannose metabolism - Aspergillus oryzae; aor01100 Metabolic pathways - Aspergillus o…
I8TUS9	Tricarboxylate carrier protein	0.458	Down	9.23828e-05	Ao3042_05975	32.68	25.003	24.9	7	11	7	mitochondria	transport; localization; establishment of localization;	intrinsic component of membrane; membrane; integral component of membrane; membrane part;		K15100			IPR023395;	Mitochondrial carrier domain;	[C]	KOG0756	Mitochondrial tricarboxylate/dicarboxylate carrier proteins
I8TV19		0.46	Down	0.027378	Ao3042_05700	22.067	4.4129	8.4	2	2	2	cytoskeleton
I8TVE8	DNA methyltransferase 1-associated protein-1	0.508	Down	0.0006401	Ao3042_05374	65.912	12.633	7.1	4	7	4	nuclear	single-organism process; cellular metabolic process; negative regulation of RNA metabolic process; regulation of RNA biosynthetic process; metabolic process; protein acylation; protein metabolic process; macromolecule metabolic process; negative regulation of macromolecule biosynthetic process; negative regulation of nucleic acid-templated transcription; cellular response to stimulus; regulation …	intracellular organelle; intracellular organelle part; nuclear lumen; macromolecular complex; intracellular part; H4 histone acetyltransferase complex; transferase complex; cell; H4/H2A histone acetyltransferase complex; organelle part; histone acetyltransferase complex; membrane-enclosed lumen; intracellular membrane-bounded organelle; organelle; NuA4 histone acetyltransferase complex; catalytic…	organic cyclic compound binding; heterocyclic compound binding; DNA binding; methyltransferase activity; catalytic activity; binding; macromolecular complex binding; nucleic acid binding; transferase activity, transferring one-carbon groups; chromatin binding; transferase activity;	K11324			IPR009057; IPR008468; IPR032563;	Homeodomain-like; DNA methyltransferase 1-associated 1; DAMP1, SANT/Myb-like domain;	[BK]	KOG2656	DNA methyltransferase 1-associated protein-1
I8TVJ7	Branched-chain-amino-acid aminotransferase	2.11	Up	2.53837e-10	Ao3042_05529	44.378	146.44	41.1	14	24	14	cytosol	cellular amino acid biosynthetic process; organic acid biosynthetic process; single-organism biosynthetic process; branched-chain amino acid biosynthetic process; small molecule metabolic process; single-organism cellular process; nitrogen compound metabolic process; single-organism process; biosynthetic process; organonitrogen compound biosynthetic process; primary metabolic process; organic sub…		L-leucine transaminase activity; branched-chain-amino-acid transaminase activity; transferase activity, transferring nitrogenous groups; L-isoleucine transaminase activity; transaminase activity; catalytic activity; transferase activity; L-valine transaminase activity;	K00826	E2.6.1.42; branched-chain amino acid aminotransferase [EC:2.6.1.42]	aor01110 Biosynthesis of secondary metabolites - Aspergillus oryzae; aor00270 Cysteine and methionine metabolism - Aspergillus oryzae; aor00280 Valine, leucine and isoleucine degradation - Aspergillus oryzae; aor00290 Valine, leucine and isoleucine biosynthesis - Aspergillus oryzae; aor01210 2-Oxocarboxylic acid metabolism - Aspergillus oryzae; aor00770 Pantothenate and CoA biosynthesis - Aspergi…			[E]	KOG0975	Branched chain aminotransferase BCAT1, pyridoxal phosphate enzymes type IV superfamily
I8TVN0	SH3 domain protein	0.626	Down	4.94155e-05	Ao3042_05537	131.73	71.214	15.4	18	25	18	nuclear			protein binding; binding;	K20521			IPR001452;	SH3 domain;
I8TVS8		1.506	Up	0.00359999	Ao3042_05392	82.201	14.748	3.6	2	2	2	cytosol
I8TVY2	Peptidyl-prolyl cis-trans isomerase	2.205	Up	5.9832e-09	Ao3042_05351	22.97	48.947	56.2	9	26	9	endoplasmic reticulum	cellular protein metabolic process; protein peptidyl-prolyl isomerization; peptidyl-proline modification; primary metabolic process; cellular metabolic process; organic substance metabolic process; protein folding; peptidyl-amino acid modification; metabolic process; cellular macromolecule metabolic process; cellular protein modification process; protein metabolic process; macromolecule metabolic…		peptidyl-prolyl cis-trans isomerase activity; isomerase activity; catalytic activity; cis-trans isomerase activity;	K03768			IPR002130; IPR029000;	Cyclophilin-type peptidyl-prolyl cis-trans isomerase domain; Cyclophilin-like domain;	[O]	KOG0880	Peptidyl-prolyl cis-trans isomerase
I8TW15	2-polyprenyl-6-methoxyphenol hydroxylase	0.545	Down	3.00091e-08	Ao3042_05289	35.331	66.361	26.1	10	20	10	extracellular	single-organism process; metabolic process; oxidation-reduction process; single-organism metabolic process;		organic cyclic compound binding; heterocyclic compound binding; nucleoside phosphate binding; flavin adenine dinucleotide binding; catalytic activity; binding; ion binding; anion binding; nucleotide binding; cofactor binding; oxidoreductase activity; small molecule binding; FAD binding; coenzyme binding;	K00480	E1.14.13.1; salicylate hydroxylase [EC:1.14.13.1]	aor01100 Metabolic pathways - Aspergillus oryzae;	IPR002938; IPR023753;	FAD-binding domain; FAD/NAD(P)-binding domain;
I8TW46	GTPase Rab5/YPT51	0.453	Down	1.98e-09	Ao3042_05307	23.795	67.638	57.8	11	28	10	mitochondria	regulation of cellular process; single organism signaling; cellular response to stimulus; intracellular signal transduction; single-organism cellular process; single-organism process; organic substance transport; small GTPase mediated signal transduction; signaling; response to stimulus; protein transport; establishment of localization; establishment of protein localization; transport; signal tra…		nucleoside phosphate binding; nucleoside binding; ion binding; nucleotide binding; organic cyclic compound binding; heterocyclic compound binding; ribonucleoside binding; carbohydrate derivative binding; ribonucleotide binding; binding; purine ribonucleoside binding; anion binding; purine ribonucleotide binding; purine nucleoside binding; guanyl ribonucleotide binding; guanyl nucleotide binding; …	K07889	RAB5C; Ras-related protein Rab-5C	aor04144 Endocytosis - Aspergillus oryzae; aor04145 Phagosome - Aspergillus oryzae;	IPR005225; IPR027417;	Small GTP-binding protein domain; P-loop containing nucleoside triphosphate hydrolase;	[U]	KOG0092	GTPase Rab5/YPT51 and related small G protein superfamily GTPases
I8TW89	Malic enzyme	0.356	Down	1.58218e-08	Ao3042_05030	72.837	139.79	30.9	17	30	17	mitochondria	dicarboxylic acid metabolic process; metabolic process; oxidation-reduction process; single-organism metabolic process; malate metabolic process; small molecule metabolic process; carboxylic acid metabolic process; single-organism cellular process; single-organism process; organic acid metabolic process; cellular process; cellular metabolic process; oxoacid metabolic process; organic substance me…		malate dehydrogenase (decarboxylating) (NAD+) activity; nucleoside phosphate binding; ion binding; nucleotide binding; cofactor binding; oxidoreductase activity; oxidoreductase activity, acting on CH-OH group of donors; heterocyclic compound binding; organic cyclic compound binding; oxidoreductase activity, acting on the CH-OH group of donors, NAD or NADP as acceptor; catalytic activity; NAD bind…	K00029	E1.1.1.40; malate dehydrogenase (oxaloacetate-decarboxylating)(NADP+) [EC:1.1.1.40]	aor01200 Carbon metabolism - Aspergillus oryzae; aor00620 Pyruvate metabolism - Aspergillus oryzae; aor01100 Metabolic pathways - Aspergillus oryzae;	IPR012302; IPR012301; IPR016040;	Malic enzyme, NAD-binding; Malic enzyme, N-terminal domain; NAD(P)-binding domain;	[C]	KOG1257	NADP+-dependent malic enzyme
I8TWE5		0.084	Down	0.0107278	Ao3042_04678	77.525	12.06	4.3	3	3	3	nuclear			organic cyclic compound binding; heterocyclic compound binding; binding; nucleic acid binding; ion binding; cation binding; metal ion binding;				IPR015880; IPR007087; IPR013087;	Zinc finger, C2H2-like; Zinc finger, C2H2; Zinc finger C2H2-type/integrase DNA-binding domain;
I8TX58	Isoleucyl-tRNA synthetase	1.741	Up	3.24896e-12	Ao3042_04683	124.24	323.31	46.1	42	87	42	cytosol	cellular aromatic compound metabolic process; cellular protein metabolic process; single-organism process; biosynthetic process; isoleucyl-tRNA aminoacylation; tRNA aminoacylation; cellular metabolic process; organic substance metabolic process; metabolic process; cellular amino acid metabolic process; heterocycle metabolic process; nucleobase-containing compound metabolic process; cellular nitro…	intracellular part; cell; cell part; intracellular; cytoplasm;	ligase activity, forming aminoacyl-tRNA and related compounds; carboxylic ester hydrolase activity; nucleoside phosphate binding; ligase activity, forming carbon-oxygen bonds; ligase activity; hydrolase activity; organic cyclic compound binding; heterocyclic compound binding; tRNA binding; catalytic activity; ribonucleotide binding; binding; purine ribonucleoside binding; anion binding; adenyl ri…	K01870	IARS; isoleucyl-tRNA synthetase [EC:6.1.1.5]	aor00970 Aminoacyl-tRNA biosynthesis - Aspergillus oryzae;	IPR014729; IPR033709; IPR013155; IPR009008; IPR002300; IPR009080;	Rossmann-like alpha/beta/alpha sandwich fold; Isoleucyl tRNA synthetase type 2, anticodon-binding domain; Methionyl/Valyl/Leucyl/Isoleucyl-tRNA synthetase, anticodon-binding; Valyl/Leucyl/Isoleucyl-tRNA synthetase, editing domain; Aminoacyl-tRNA synthetase, class Ia; Aminoacyl-tRNA synthetase, class Ia, anticodon-binding;	[J]	KOG0434	Isoleucyl-tRNA synthetase
I8TX69		0.347	Down	2.88658e-15	Ao3042_04605	162.41	111.4	22.1	29	36	29	nuclear			protein binding; binding;	K18730			IPR003169;	GYF domain;	[R]	KOG1862	GYF domain containing proteins
I8TXR0		2.694	Up	7.93412e-05	Ao3042_04358	30.028	12.905	15.3	4	4	4	extracellular				K11244	WSC; cell wall integrity and stress response component	aor04011 MAPK signaling pathway - yeast - Aspergillus oryzae; aor04139 Mitophagy - yeast - Aspergillus oryzae;	IPR002889; IPR013320;	Carbohydrate-binding WSC; Concanavalin A-like lectin/glucanase domain;	[GO]	KOG4157	beta-1,6-N-acetylglucosaminyltransferase, contains WSC domain
I8TXS4	Alkyl hydroperoxide reductase/peroxiredoxin	0.603	Down	3.60748e-07	Ao3042_04311	19.309	99.325	50	8	19	8	mitochondria	regulation of cellular process; homeostatic process; regulation of biological quality; regulation of biological process; cell redox homeostasis; single-organism cellular process; cellular homeostasis; single-organism process; cellular process; biological regulation;		catalytic activity; oxidoreductase activity;	K11187	PRDX5; peroxiredoxin 5, atypical 2-Cys peroxiredoxin [EC:1.11.1.15]	aor04146 Peroxisome - Aspergillus oryzae;	IPR012336; IPR013766; IPR013740;	Thioredoxin-like fold; Thioredoxin domain; Redoxin;	[O]	KOG0541	Alkyl hydroperoxide reductase/peroxiredoxin
I8TY04	Oxodicarboxylate carrier protein	0.401	Down	5.50626e-12	Ao3042_04247	33.185	101.04	35.5	8	25	8	mitochondria	transport; transmembrane transport; single-organism localization; single-organism cellular process; single-organism process; localization; cellular process; single-organism transport; establishment of localization;	intrinsic component of membrane; membrane; integral component of membrane; membrane part;		K15110			IPR023395;	Mitochondrial carrier domain;	[C]	KOG0754	Mitochondrial oxodicarboxylate carrier protein
I8TY05	Serine/threonine protein phosphatase	0.399	Down	0.0311054	Ao3042_04492	48.986	102.33	43.4	16	28	4	cytosol, nuclear	cellular protein metabolic process; primary metabolic process; protein dephosphorylation; dephosphorylation; cellular metabolic process; phosphate-containing compound metabolic process; organic substance metabolic process; metabolic process; phosphorus metabolic process; cellular macromolecule metabolic process; cellular protein modification process; protein metabolic process; macromolecule metab…		phosphoric ester hydrolase activity; catalytic activity; protein serine/threonine phosphatase activity; phosphatase activity; binding; hydrolase activity, acting on ester bonds; ion binding; cation binding; metal ion binding; hydrolase activity; phosphoprotein phosphatase activity;	K14803			IPR001932;	PPM-type phosphatase domain;	[T]	KOG0698	Serine/threonine protein phosphatase
I8TY64		0.563	Down	0.000231	Ao3042_04200	30.031	31.207	32.7	9	14	9	nuclear			organic cyclic compound binding; heterocyclic compound binding; DNA binding; transition metal ion binding; binding; ion binding; nucleic acid binding; metal ion binding; cation binding; zinc ion binding;				IPR001510;	Zinc finger, PARP-type;
I8TY76	Protoporphyrinogen oxidase	1.545	Up	3.25051e-12	Ao3042_04230	59.368	168.59	48.1	23	51	23	mitochondria	single-organism process; metabolic process; oxidation-reduction process; single-organism metabolic process;		catalytic activity; oxidoreductase activity;				IPR023753;	FAD/NAD(P)-binding domain;
I8TYE8	Choline dehydrogenase	0.566	Down	0.000153	Ao3042_04059	62.634	92.931	34	18	35	18	cytosol	metabolic process; organic hydroxy compound metabolic process; alcohol metabolic process; oxidation-reduction process; single-organism metabolic process; small molecule metabolic process; single-organism process; organic substance metabolic process;		nucleoside phosphate binding; flavin adenine dinucleotide binding; ion binding; nucleotide binding; choline dehydrogenase activity; cofactor binding; oxidoreductase activity; oxidoreductase activity, acting on CH-OH group of donors; heterocyclic compound binding; organic cyclic compound binding; catalytic activity; binding; anion binding; coenzyme binding; small molecule binding;				IPR000172; IPR007867; IPR023753;	Glucose-methanol-choline oxidoreductase, N-terminal; Glucose-methanol-choline oxidoreductase, C-terminal; FAD/NAD(P)-binding domain;
I8TYE9	Conserved oligomeric Golgi family complex subunit 6	0.59	Down	0.0293	Ao3042_04322	83.004	56.506	10.2	6	6	6	mitochondria	transport; intracellular transport; establishment of localization in cell; single-organism localization; intra-Golgi vesicle-mediated transport; vesicle-mediated transport; single-organism process; Golgi vesicle transport; localization; single-organism intracellular transport; single-organism transport; establishment of localization; cellular localization;	intracellular organelle; cytoplasm; intracellular organelle part; endomembrane system; macromolecular complex; intracellular part; cell; organelle part; intracellular membrane-bounded organelle; organelle; cell part; intracellular; Golgi apparatus part; membrane-bounded organelle; Golgi transport complex; Golgi apparatus; protein complex; cytoplasmic part;		K20293					[S]	KOG3758	Uncharacterized conserved protein
I8TYK7	phosphotransferase family protein [Aspergillus oryzae 3.042]	0.476	Down	1.9334e-06	Ao3042_04254	67.393	32.173	20.5	12	16	12	mitochondria			catalytic activity; transferase activity; transferase activity, transferring phosphorus-containing groups;				IPR002575; IPR011009;	Aminoglycoside phosphotransferase; Protein kinase-like domain;
I8TYQ6	Zn2+ transporter ZNT1	0.129	Down	9.55e-05	Ao3042_03913	55.677	20.724	11.2	5	9	5	plasma membrane	transport; transmembrane transport; single-organism localization; cation transport; ion transport; single-organism cellular process; single-organism process; localization; cellular process; single-organism transport; establishment of localization;	intrinsic component of membrane; membrane; integral component of membrane; membrane part;	substrate-specific transporter activity; ion transmembrane transporter activity; cation transmembrane transporter activity; transporter activity; transmembrane transporter activity; substrate-specific transmembrane transporter activity;	K14688			IPR027469;	Cation efflux protein transmembrane domain;	[P]	KOG1483	Zn2+ transporter ZNT1 and related Cd2+/Zn2+ transporters (cation diffusion facilitator superfamily)
I8TYT0	"Translation initiation factor 2, alpha subunit"	3.679	Up	3.24918e-12	Ao3042_04161	34.977	155.91	58.1	18	51	18	cytosol, nuclear		cell part; intracellular; eukaryotic translation initiation factor 2 complex; cytoplasm; macromolecular complex; intracellular part; protein complex; cell; cytoplasmic part;	organic cyclic compound binding; heterocyclic compound binding; translation factor activity, nucleic acid binding; RNA binding; binding; nucleic acid binding; translation initiation factor activity;	K03237	EIF2S1; translation initiation factor 2 subunit 1	aor04141 Protein processing in endoplasmic reticulum - Aspergillus oryzae; aor03013 RNA transport - Aspergillus oryzae;	IPR024054; IPR012340; IPR003029; IPR022967; IPR024055;	Translation initiation factor 2, alpha subunit, middle domain; Nucleic acid-binding, OB-fold; S1 domain; RNA-binding domain, S1; Translation initiation factor 2, alpha subunit, C-terminal;	[J]	KOG2916	Translation initiation factor 2, alpha subunit (eIF-2alpha)
I8TZP0	Glucose-6-phosphate 1-dehydrogenase	2.13	Up	3.25e-12	Ao3042_03853	58.846	203.58	68	35	105	35	cytosol	NADP metabolic process; pyridine nucleotide metabolic process; cellular aromatic compound metabolic process; nicotinamide nucleotide metabolic process; organophosphate catabolic process; nucleotide metabolic process; single-organism process; cellular metabolic process; pyridine-containing compound metabolic process; phosphate-containing compound metabolic process; organic substance metabolic proc…		oxidoreductase activity, acting on CH-OH group of donors; organic cyclic compound binding; heterocyclic compound binding; oxidoreductase activity, acting on the CH-OH group of donors, NAD or NADP as acceptor; nucleoside phosphate binding; catalytic activity; binding; glucose-6-phosphate dehydrogenase activity; NADP binding; nucleotide binding; cofactor binding; oxidoreductase activity; coenzyme b…	K00036	G6PD; glucose-6-phosphate 1-dehydrogenase [EC:1.1.1.49 1.1.1.363]	aor00030 Pentose phosphate pathway - Aspergillus oryzae; aor01200 Carbon metabolism - Aspergillus oryzae; aor01110 Biosynthesis of secondary metabolites - Aspergillus oryzae; aor01130 Biosynthesis of antibiotics - Aspergillus oryzae; aor00480 Glutathione metabolism - Aspergillus oryzae; aor01100 Metabolic pathways - Aspergillus oryzae;	IPR022675; IPR016040; IPR022674;	Glucose-6-phosphate dehydrogenase, C-terminal; NAD(P)-binding domain; Glucose-6-phosphate dehydrogenase, NAD-binding;	[G]	KOG0563	Glucose-6-phosphate 1-dehydrogenase
I8TZU9		2.79	Up	0.000163369	Ao3042_03580	40.954	37.247	23.7	7	11	7	mitochondria	metabolic process;		hydrolase activity; catalytic activity;				IPR029058; IPR013094;	Alpha/Beta hydrolase fold; Alpha/beta hydrolase fold-3;
I8U023	Synaptic vesicle protein EHS-1	0.458	Down	2.13601e-08	Ao3042_03456	132.27	143.83	26.1	28	52	28	nuclear			cation binding; metal ion binding; protein binding; calcium ion binding; binding; ion binding;	K12472	EPS15; epidermal growth factor receptor substrate 15	aor04144 Endocytosis - Aspergillus oryzae;	IPR015940; IPR000261; IPR002048; IPR011992; IPR009060;	Ubiquitin-associated domain; EH domain; EF-hand domain; EF-hand domain pair; UBA-like;	[TU]	KOG0998	Synaptic vesicle protein EHS-1 and related EH domain proteins
I8U031	Protein phosphatase methylesterase 1	0.194	Down	7.17523e-05	Ao3042_03484	44.975	21.12	9.5	3	3	3	mitochondria	demethylation; single-organism cellular process; cellular protein metabolic process; single-organism process; primary metabolic process; cellular metabolic process; protein dealkylation; organic substance metabolic process; metabolic process; single-organism metabolic process; protein demethylation; cellular macromolecule metabolic process; cellular protein modification process; protein metabolic…		hydrolase activity; carboxylic ester hydrolase activity; catalytic activity; hydrolase activity, acting on ester bonds;	K13617			IPR029058; IPR000073;	Alpha/Beta hydrolase fold; Alpha/beta hydrolase fold-1;	[R]	KOG2564	Predicted acetyltransferases and hydrolases with the alpha/beta hydrolase fold
I8U043		0.344	Down	0.000834468	Ao3042_03496	27.763	15.742	17.9	3	6	3	cytoskeleton			catalytic activity; phosphoric ester hydrolase activity; binding; hydrolase activity, acting on ester bonds; ion binding; cation binding; metal ion binding; hydrolase activity; phosphoric diester hydrolase activity;	K06950			IPR006674; IPR003607;	HD domain; HD/PDEase domain;
I8U063	Cytochrome protein	0.516	Down	0.000389907	Ao3042_03590	45.688	60.212	35.3	12	19	12	mitochondria	single-organism process; metabolic process; oxidation-reduction process; single-organism metabolic process;		organic cyclic compound binding; heterocyclic compound binding; heme binding; iron ion binding; transition metal ion binding; catalytic activity; binding; ion binding; cation binding; metal ion binding; oxidoreductase activity, acting on paired donors, with incorporation or reduction of molecular oxygen; monooxygenase activity; tetrapyrrole binding; oxidoreductase activity;	K15877	CYP55; fungal nitric oxide reductase [EC:1.7.1.14]	aor00910 Nitrogen metabolism - Aspergillus oryzae;			[QI]	KOG0157	Cytochrome P450 CYP4/CYP19/CYP26 subfamilies
I8U094		0.294	Down	0.000831229	Ao3042_03574	29.728	14.245	21.4	5	8	5	nuclear							IPR014729; IPR003848;	Rossmann-like alpha/beta/alpha sandwich fold; Domain of unknown function DUF218;
I8U0B6	ARK protein kinase family	0.474	Down	0.000662867	Ao3042_03512	111.04	33.203	13.2	11	11	11	nuclear	phosphorylation; cellular protein metabolic process; primary metabolic process; cellular metabolic process; phosphate-containing compound metabolic process; organic substance metabolic process; metabolic process; protein phosphorylation; phosphorus metabolic process; cellular macromolecule metabolic process; cellular protein modification process; protein metabolic process; macromolecule metabolic…		ATP binding; nucleoside phosphate binding; phosphotransferase activity, alcohol group as acceptor; nucleoside binding; ion binding; nucleotide binding; protein kinase activity; organic cyclic compound binding; heterocyclic compound binding; ribonucleoside binding; carbohydrate derivative binding; kinase activity; ribonucleotide binding; catalytic activity; binding; purine ribonucleoside binding; …	K08853			IPR000719; IPR011009;	Protein kinase domain; Protein kinase-like domain;	[T]	KOG1989	ARK protein kinase family
I8U0H7	"Chaperonin complex component, TCP-1 delta subunit"	0.408	Down	1e-32	Ao3042_03386	56.984	249.01	52.8	24	54	24	cytosol	protein folding; metabolic process; cellular protein metabolic process; cellular macromolecule metabolic process; macromolecule metabolic process; protein metabolic process; primary metabolic process; cellular process; cellular metabolic process; organic substance metabolic process;	intracellular part; cell; cell part; intracellular; cytoplasm;	ATP binding; nucleoside phosphate binding; nucleoside binding; ion binding; protein binding; nucleotide binding; organic cyclic compound binding; heterocyclic compound binding; ribonucleoside binding; carbohydrate derivative binding; ribonucleotide binding; binding; purine ribonucleoside binding; anion binding; purine ribonucleotide binding; unfolded protein binding; adenyl ribonucleotide binding…	K09494			IPR027410; IPR027409; IPR027413;	TCP-1-like chaperonin intermediate domain; GroEL-like apical domain; GroEL-like equatorial domain;	[O]	KOG0363	Chaperonin complex component, TCP-1 beta subunit (CCT2)
I8U0I8	Alanine-glyoxylate aminotransferase AGT1	1.631	Up	1.28889e-09	Ao3042_03171	41.664	47.287	25.4	9	26	9	cytosol			organic cyclic compound binding; heterocyclic compound binding; transferase activity, transferring nitrogenous groups; catalytic activity; binding; ion binding; anion binding; transaminase activity; transferase activity; cofactor binding; pyridoxal phosphate binding;	K00830	AGXT; alanine-glyoxylate transaminase / serine-glyoxylate transaminase / serine-pyruvate transaminase [EC:2.6.1.44 2.6.1.45 2.6.1.51]	aor01200 Carbon metabolism - Aspergillus oryzae; aor00630 Glyoxylate and dicarboxylate metabolism - Aspergillus oryzae; aor00260 Glycine, serine and threonine metabolism - Aspergillus oryzae; aor01110 Biosynthesis of secondary metabolites - Aspergillus oryzae; aor00680 Methane metabolism - Aspergillus oryzae; aor04146 Peroxisome - Aspergillus oryzae; aor01130 Biosynthesis of antibiotics - Aspergi…	IPR015424; IPR000192; IPR015422; IPR015421;	Pyridoxal phosphate-dependent transferase; Aminotransferase class V domain; Pyridoxal phosphate-dependent transferase, major region, subdomain 2; Pyridoxal phosphate-dependent transferase, major region, subdomain 1;
I8U0L7		0.247	Down	0.000735582	Ao3042_03236	78.616	32.178	10.7	7	9	7	nuclear			protein binding; binding;	K16536			IPR001715;	Calponin homology domain;
I8U0W3		0.436	Down	0.00247781	Ao3042_03268	29.923	64.386	26.2	5	14	5	nuclear		intrinsic component of membrane; membrane; integral component of membrane; membrane part;							[R]	KOG1944	Peroxisomal membrane protein MPV17 and related proteins
I8U146		0.521	Down	1.394e-12	Ao3042_03204	162.02	188.17	21.3	30	48	30	mitochondria			protein binding; binding;				IPR017986; IPR015943;	WD40-repeat-containing domain; WD40/YVTN repeat-like-containing domain;
I8U175		0.269	Down	0.011493	Ao3042_02836	43.325	36.821	13.9	5	6	5	mitochondria, nuclear	protein deneddylation; protein modification by small protein removal; metabolic process; cellular protein metabolic process; cellular macromolecule metabolic process; cellular protein modification process; macromolecule metabolic process; protein metabolic process; protein modification by small protein conjugation or removal; macromolecule modification; protein modification process; primary metab…	organelle; intracellular organelle; intracellular membrane-bounded organelle; nucleus; cell part; intracellular; intracellular organelle part; macromolecular complex; intracellular part; protein complex; COP9 signalosome; cell; membrane-bounded organelle; organelle part; nuclear part;	protein binding; binding;	K12179			IPR000555; IPR024969;	JAB1/MPN/MOV34 metalloenzyme domain; Rpn11/EIF3F, C-terminal;	[OT]	KOG3050	COP9 signalosome, subunit CSN6
I8U1J0		4.475	Up	0.000526	Ao3042_03116	26.398	17.402	28	6	7	6	extracellular
I8U1L3	Geranylgeranyl pyrophosphate synthase/Polyprenyl synthetase	1.639	Up	4.37532e-05	Ao3042_02827	81.995	69.157	25.4	15	18	15	mitochondria	isoprenoid metabolic process; single-organism biosynthetic process; single-organism cellular process; single-organism process; biosynthetic process; cellular lipid metabolic process; primary metabolic process; organic substance biosynthetic process; cellular metabolic process; cellular biosynthetic process; organic substance metabolic process; lipid biosynthetic process; isoprenoid biosynthetic p…						IPR008949;	Isoprenoid synthase domain;
I8U1T9	S-(hydroxymethyl)glutathione dehydrogenase	3.725	Up	3.25e-12	Ao3042_03089	66.297	251.17	38.1	19	62	18	extracellular	ethanol oxidation; organic hydroxy compound metabolic process; single-organism catabolic process; alcohol metabolic process; oxidation-reduction process; small molecule metabolic process; single-organism cellular process; cellular aldehyde metabolic process; single-organism process; small molecule catabolic process; cellular metabolic process; organic substance metabolic process; organic substanc…		oxidoreductase activity, acting on CH-OH group of donors; oxidoreductase activity, acting on the CH-OH group of donors, NAD or NADP as acceptor; transition metal ion binding; catalytic activity; binding; ion binding; metal ion binding; cation binding; lyase activity; carbon-sulfur lyase activity; zinc ion binding; S-(hydroxymethyl)glutathione synthase activity; S-(hydroxymethyl)glutathione dehydr…	K00121	frmA; S-(hydroxymethyl)glutathione dehydrogenase / alcohol dehydrogenase [EC:1.1.1.284 1.1.1.1]	aor01200 Carbon metabolism - Aspergillus oryzae; aor00350 Tyrosine metabolism - Aspergillus oryzae; aor00010 Glycolysis / Gluconeogenesis - Aspergillus oryzae; aor01110 Biosynthesis of secondary metabolites - Aspergillus oryzae; aor01130 Biosynthesis of antibiotics - Aspergillus oryzae; aor00680 Methane metabolism - Aspergillus oryzae; aor00071 Fatty acid degradation - Aspergillus oryzae; aor0110…	IPR011032; IPR006913; IPR016040; IPR011057; IPR013154; IPR013149;	GroES-like; Glutathione-dependent formaldehyde-activating enzyme/centromere protein V; NAD(P)-binding domain; Mss4-like; Alcohol dehydrogenase, N-terminal; Alcohol dehydrogenase, C-terminal;	[Q]	KOG0022	Alcohol dehydrogenase, class III
I8U200		0.283	Down	1.09024e-09	Ao3042_02940	14.42	67.459	48.4	5	15	5	cytosol							IPR027843; IPR032710;	Domain of unknown function DUF4440; NTF2-like domain;
I8U2Q3		0.129	Down	1.23057e-12	Ao3042_02427	113.89	111.43	16.9	14	25	14	nuclear			organic cyclic compound binding; heterocyclic compound binding; nucleoside phosphate binding; binding; nucleic acid binding; nucleotide binding; small molecule binding;				IPR000504; IPR012677;	RNA recognition motif domain; Nucleotide-binding alpha-beta plait domain;	[K]	KOG4210	Nuclear localization sequence binding protein
I8U2T9	Tryptophan synthase beta chain	0.408	Down	7.16133e-06	Ao3042_02407	73.837	126.54	35.5	17	28	13	cytoskeleton	organic acid biosynthetic process; cellular aromatic compound metabolic process; tryptophan biosynthetic process; single-organism process; biosynthetic process; organonitrogen compound biosynthetic process; indole-containing compound biosynthetic process; cellular metabolic process; cellular biogenic amine metabolic process; organic substance metabolic process; metabolic process; cellular amino a…		lyase activity; hydro-lyase activity; tryptophan synthase activity; catalytic activity; carbon-oxygen lyase activity;	K01694	TRP; tryptophan synthase [EC:4.2.1.20]	aor00400 Phenylalanine, tyrosine and tryptophan biosynthesis - Aspergillus oryzae; aor00260 Glycine, serine and threonine metabolism - Aspergillus oryzae; aor01110 Biosynthesis of secondary metabolites - Aspergillus oryzae; aor01130 Biosynthesis of antibiotics - Aspergillus oryzae; aor01230 Biosynthesis of amino acids - Aspergillus oryzae; aor01100 Metabolic pathways - Aspergillus oryzae;	IPR013785; IPR001926; IPR011060;	Aldolase-type TIM barrel; Tryptophan synthase beta subunit-like PLP-dependent enzyme; Ribulose-phosphate binding barrel;	[E]	KOG1395	Tryptophan synthase beta chain
I8U351		0.405	Down	0.00438295	Ao3042_02295	30.847	18.382	29.1	7	10	7	cytosol
I8U3A3		1.652	Up	0.00639	Ao3042_02307	14.649	27.691	46.9	5	6	5	mitochondria							IPR009799; IPR011008;	EthD domain; Dimeric alpha-beta barrel;
I8U410	"1,2-dihydroxy-3-keto-5-methylthiopentene dioxygenase"	0.375	Down	0.00123	ADI1	20.811	93.698	75.3	11	22	11	nuclear	sulfur amino acid biosynthetic process; organic acid biosynthetic process; L-methionine biosynthetic process from methylthioadenosine; aspartate family amino acid metabolic process; single-organism process; biosynthetic process; organonitrogen compound biosynthetic process; cellular metabolic process; sulfur amino acid metabolic process; sulfur compound biosynthetic process; organic substance met…	organelle; intracellular membrane-bounded organelle; intracellular organelle; nucleus; cell part; intracellular; cytoplasm; intracellular part; membrane-bounded organelle; cell;	oxidoreductase activity, acting on single donors with incorporation of molecular oxygen, incorporation of two atoms of oxygen; iron ion binding; oxidoreductase activity, acting on single donors with incorporation of molecular oxygen; transition metal ion binding; catalytic activity; binding; dioxygenase activity; ion binding; metal ion binding; cation binding; acireductone dioxygenase [iron(II)-r…	K08967	mtnD; 1,2-dihydroxy-3-keto-5-methylthiopentene dioxygenase [EC:1.13.11.53 1.13.11.54]	aor00270 Cysteine and methionine metabolism - Aspergillus oryzae; aor01100 Metabolic pathways - Aspergillus oryzae;	IPR011051; IPR014710;	RmlC-like cupin domain; RmlC-like jelly roll fold;	[S]	KOG2107	Uncharacterized conserved protein, contains double-stranded beta-helix domain
I8U426		5.723	Up	3.84789e-08	Ao3042_01945	23.486	19.009	25.8	6	8	5	extracellular
I8U468		1.788	Up	9.28272e-07	Ao3042_02115	24.248	20.532	31.3	7	9	7	nuclear	metabolic process;		lyase activity; carbon-sulfur lyase activity; catalytic activity;				IPR006913; IPR011057;	Glutathione-dependent formaldehyde-activating enzyme/centromere protein V; Mss4-like;
I8U4I7		3.198	Up	3.24896e-12	Ao3042_01722	80.441	143.25	31.8	19	54	19	extracellular	proteolysis; metabolic process; macromolecule metabolic process; protein metabolic process; primary metabolic process; organic substance metabolic process;		peptidase activity, acting on L-amino acid peptides; hydrolase activity; peptidase activity; catalytic activity; serine hydrolase activity; serine-type peptidase activity;				IPR005151; IPR029045;	Tail specific protease; ClpP/crotonase-like domain;
I8U4K2	FAD dependent oxidoreductase superfamily	4.164	Up	2.21466e-08	Ao3042_01873	28.49	88.897	44.8	8	17	8	cytosol	single-organism process; metabolic process; oxidation-reduction process; single-organism metabolic process;		catalytic activity; oxidoreductase activity;				IPR006076; IPR023753;	FAD dependent oxidoreductase; FAD/NAD(P)-binding domain;
I8U4K7	FAD dependent oxidoreductase superfamily [Aspergillus oryzae 3.042]	2.12	Up	0.00163372	Ao3042_01915	52.27	17.688	11.8	5	6	5	mitochondria	single-organism process; metabolic process; oxidation-reduction process; single-organism metabolic process;		catalytic activity; oxidoreductase activity;				IPR006076; IPR023753;	FAD dependent oxidoreductase; FAD/NAD(P)-binding domain;
I8U4V2	Branched-chain amino acid aminotransferase/4-amino-4-deoxychorismate lyase	1.53	Up	1.55138e-08	Ao3042_01644	41.01	178.09	46.3	13	30	13	mitochondria	small molecule metabolic process; single-organism cellular process; nitrogen compound metabolic process; single-organism process; primary metabolic process; cellular metabolic process; organic substance metabolic process; metabolic process; cellular amino acid metabolic process; single-organism metabolic process; carboxylic acid metabolic process; organic acid metabolic process; branched-chain am…		branched-chain-amino-acid transaminase activity; transferase activity, transferring nitrogenous groups; lyase activity; transaminase activity; transferase activity; catalytic activity;	K00826	E2.6.1.42; branched-chain amino acid aminotransferase [EC:2.6.1.42]	aor01110 Biosynthesis of secondary metabolites - Aspergillus oryzae; aor00270 Cysteine and methionine metabolism - Aspergillus oryzae; aor00280 Valine, leucine and isoleucine degradation - Aspergillus oryzae; aor00290 Valine, leucine and isoleucine biosynthesis - Aspergillus oryzae; aor01210 2-Oxocarboxylic acid metabolism - Aspergillus oryzae; aor00770 Pantothenate and CoA biosynthesis - Aspergi…			[E]	KOG0975	Branched chain aminotransferase BCAT1, pyridoxal phosphate enzymes type IV superfamily
I8U534	Adenosylmethionine-8-amino-7-oxononanoate aminotransferase	2.762	Up	9.74847e-10	Ao3042_01586	49.257	135.74	33.6	12	29	12	cytosol, mitochondria			organic cyclic compound binding; heterocyclic compound binding; transferase activity, transferring nitrogenous groups; catalytic activity; binding; ion binding; anion binding; transaminase activity; transferase activity; cofactor binding; pyridoxal phosphate binding;				IPR015424; IPR015421; IPR015422;	Pyridoxal phosphate-dependent transferase; Pyridoxal phosphate-dependent transferase, major region, subdomain 1; Pyridoxal phosphate-dependent transferase, major region, subdomain 2;	[E]	KOG1404	Alanine-glyoxylate aminotransferase AGT2
I8U572		0.409	Down	0.00210504	Ao3042_00680	55.165	7.2217	3.9	2	3	2	nuclear			protein binding; binding; protein dimerization activity;				IPR011598;	Myc-type, basic helix-loop-helix (bHLH) domain;	[K]	KOG2483	Upstream transcription factor 2/L-myc-2 protein
I8U5C0	Inositol polyphosphate multikinase	0.584	Down	0.00804267	Ao3042_00776	46.814	21.878	17.8	6	6	6	cytosol			kinase activity; phosphotransferase activity, alcohol group as acceptor; inositol-1,4,5-trisphosphate 3-kinase activity; catalytic activity; transferase activity; inositol trisphosphate kinase activity; transferase activity, transferring phosphorus-containing groups;	K00915	IPMK; inositol-polyphosphate multikinase [EC:2.7.1.140 2.7.1.151]	aor04070 Phosphatidylinositol signaling system - Aspergillus oryzae; aor00562 Inositol phosphate metabolism - Aspergillus oryzae; aor01100 Metabolic pathways - Aspergillus oryzae;			[KIT]	KOG1620	Inositol polyphosphate multikinase, component of the ARGR transcription regulatory complex
I8U5R5	"Transcription factor, component of CCR4 transcriptional complex"	1.718	Up	0.00564065	Ao3042_00643	49.522	35.509	20.1	7	8	7	mitochondria	alpha-amino acid catabolic process; single-organism catabolic process; small molecule metabolic process; single-organism cellular process; nitrogen compound metabolic process; single-organism process; small molecule catabolic process; alpha-amino acid metabolic process; primary metabolic process; glycine metabolic process; cellular metabolic process; organic substance metabolic process; carboxyli…	intracellular part; cell; cell part; intracellular; cytoplasm;	transferase activity, transferring one-carbon groups; methyltransferase activity; aminomethyltransferase activity; catalytic activity; transferase activity;				IPR006222;	Glycine cleavage T-protein-like, N-terminal;	[K]	KOG2929	Transcription factor, component of CCR4 transcriptional complex
I8U5S6	CTP synthase	0.51	Down	2.5024e-05	Ao3042_00848	64.131	37.718	22.5	12	17	12	cytosol	nucleoside metabolic process; pyrimidine ribonucleoside biosynthetic process; pyrimidine nucleoside triphosphate metabolic process; nucleotide metabolic process; single-organism process; nucleoside biosynthetic process; biosynthetic process; CTP metabolic process; cellular metabolic process; phosphate-containing compound metabolic process; ribose phosphate biosynthetic process; metabolic process;…		ATP binding; nucleoside phosphate binding; ligase activity; nucleoside binding; ion binding; nucleotide binding; ligase activity, forming carbon-nitrogen bonds; organic cyclic compound binding; heterocyclic compound binding; ribonucleoside binding; carbohydrate derivative binding; catalytic activity; ribonucleotide binding; binding; CTP synthase activity; purine ribonucleoside binding; anion bind…	K01937	pyrG; CTP synthase [EC:6.3.4.2]	aor00240 Pyrimidine metabolism - Aspergillus oryzae; aor01100 Metabolic pathways - Aspergillus oryzae;	IPR017456; IPR027417; IPR017926; IPR029062; IPR033828;	CTP synthase, N-terminal; P-loop containing nucleoside triphosphate hydrolase; Glutamine amidotransferase; Class I glutamine amidotransferase-like; CTP synthase GATase domain;	[F]	KOG2387	CTP synthase (UTP-ammonia lyase)
I8U610	Putative hydrolases or acyltransferase	2.084	Up	7.11e-10	Ao3042_00508	44.496	97.811	30.5	11	29	11	mitochondria			cis-stilbene-oxide hydrolase activity; hydrolase activity; hydrolase activity, acting on ether bonds; transferase activity, transferring acyl groups; catalytic activity; transferase activity; ether hydrolase activity;				IPR010497; IPR029058;	Epoxide hydrolase, N-terminal; Alpha/Beta hydrolase fold;
I8U621	Dihydroxyacetone kinase/glycerone kinase	1.514	Up	0.000445	Ao3042_00616	63.286	126.45	28.2	15	30	15	cytosol	alditol metabolic process; organic hydroxy compound metabolic process; alcohol metabolic process; small molecule metabolic process; single-organism cellular process; glycerol metabolic process; single-organism process; primary metabolic process; carbohydrate metabolic process; polyol metabolic process; cellular metabolic process; organic substance metabolic process; single-organism carbohydrate m…		ATP binding; nucleoside phosphate binding; phosphotransferase activity, alcohol group as acceptor; glycerone kinase activity; nucleoside binding; ion binding; nucleotide binding; organic cyclic compound binding; heterocyclic compound binding; ribonucleoside binding; carbohydrate derivative binding; kinase activity; catalytic activity; ribonucleotide binding; binding; purine ribonucleoside binding…	K00863	DAK; triose/dihydroxyacetone kinase / FAD-AMP lyase (cyclizing) [EC:2.7.1.28 2.7.1.29 4.6.1.15]	aor01200 Carbon metabolism - Aspergillus oryzae; aor00561 Glycerolipid metabolism - Aspergillus oryzae; aor00680 Methane metabolism - Aspergillus oryzae; aor00051 Fructose and mannose metabolism - Aspergillus oryzae; aor01100 Metabolic pathways - Aspergillus oryzae;	IPR004007; IPR004006;	DhaL domain; DhaK domain;	[G]	KOG2426	Dihydroxyacetone kinase/glycerone kinase
I8U645	Isopenicillin N synthase	1.517	Up	0.0478278	Ao3042_00636	39.245	30.01	28.5	9	12	9	cytosol, nuclear	single-organism process; metabolic process; oxidation-reduction process; single-organism metabolic process;		iron ion binding; transition metal ion binding; catalytic activity; binding; dioxygenase activity; ion binding; oxidoreductase activity, acting on paired donors, with incorporation or reduction of molecular oxygen; metal ion binding; cation binding; oxidoreductase activity, acting on paired donors, with incorporation or reduction of molecular oxygen, 2-oxoglutarate as one donor, and incorporation…				IPR027443; IPR005123; IPR026992;	Isopenicillin N synthase-like; Oxoglutarate/iron-dependent dioxygenase; Non-haem dioxygenase N-terminal domain;	[QR]	KOG0143	Iron/ascorbate family oxidoreductases
I8U6C6	GNAT family acetyltransferase [Aspergillus oryzae 3.042]	0.62	Down	0.013	Ao3042_00589	25.879	29.607	29.2	5	6	5	cytoskeleton			transferase activity, transferring acyl groups; N-acetyltransferase activity; catalytic activity; transferase activity; transferase activity, transferring acyl groups other than amino-acyl groups; acetyltransferase activity; N-acyltransferase activity;				IPR000182; IPR016181;	GNAT domain; Acyl-CoA N-acyltransferase;
I8U6H3	"MAM33, matrix glycoprotein"	0.225	Down	3.07421e-12	Ao3042_00528	34.833	41.393	37.4	8	29	8	mitochondria		mitochondrial matrix; intracellular organelle; mitochondrial part; cytoplasm; intracellular organelle part; intracellular part; cell; mitochondrion; organelle part; membrane-enclosed lumen; organelle; intracellular membrane-bounded organelle; intracellular organelle lumen; cell part; intracellular; membrane-bounded organelle; cytoplasmic part; organelle lumen;		K15414					[C]	KOG2536	MAM33, mitochondrial matrix glycoprotein
I8U718	EF-hand calcium-binding domain protein [Aspergillus oryzae 3.042]	2.177	Up	0.0107476	Ao3042_00286	22.59	20.97	36.9	7	12	7	cytosol							IPR029058; IPR005645;	Alpha/Beta hydrolase fold; Serine hydrolase FSH;
I8U791		0.267	Down	0.00757431	Ao3042_00056	44.965	42.463	15.9	5	6	5	nuclear	establishment of protein localization; transport; intracellular transport; cellular macromolecule localization; establishment of localization in cell; intracellular protein transport; organic substance transport; protein localization; macromolecule localization; cellular protein localization; localization; protein transport; establishment of localization; cellular localization;	cell; intracellular; cell part;					IPR004152; IPR008942;	GAT domain; ENTH/VHS;
I8U7M5	"Ribonuclease, T2 family"	7.585	Up	1.59384e-11	Ao3042_11841	31.698	82.013	39.3	10	27	10	extracellular			RNA binding; endoribonuclease activity; hydrolase activity; endonuclease activity, active with either ribo- or deoxyribonucleic acids and producing 3'-phosphomonoesters; heterocyclic compound binding; organic cyclic compound binding; catalytic activity; ribonuclease T2 activity; binding; endoribonuclease activity, producing 3'-phosphomonoesters; nucleic acid binding; nuclease activity; hydrolase …	K01166
I8U7X8	Actin regulatory protein	0.61	Down	1.52217e-09	Ao3042_11926	44.623	76.297	43.9	15	32	15	nuclear			actin binding; protein binding; cytoskeletal protein binding; binding;	K05768			IPR029006; IPR007123;	ADF-H/Gelsolin-like domain; Gelsolin-like domain;
I8U822		0.205	Down	0.000817094	Ao3042_11909	32.956	21.157	15	4	8	4	nuclear	regulation of cellular process; regulation of phosphorus metabolic process; regulation of phosphoprotein phosphatase activity; regulation of phosphatase activity; regulation of signaling; regulation of cellular metabolic process; regulation of biological process; regulation of cell communication; regulation of hydrolase activity; regulation of catalytic activity; regulation of response to stimulu…		protein phosphatase inhibitor activity; enzyme regulator activity; phosphatase regulator activity; protein phosphatase regulator activity; enzyme inhibitor activity; molecular function regulator; phosphatase inhibitor activity;	K16833
I8U873	Phosphatidylinositol 4-kinase	0.339	Down	4.33179e-06	Ao3042_11633	219.72	37.976	7.7	13	14	13	cytosol	regulation of cellular process; single organism signaling; phosphorylation; glycerolipid metabolic process; phosphatidylinositol phosphorylation; single-organism process; cellular lipid metabolic process; response to stimulus; cellular metabolic process; phosphate-containing compound metabolic process; organic substance metabolic process; inositol lipid-mediated signaling; metabolic process; sign…		kinase activity; phosphotransferase activity, alcohol group as acceptor; catalytic activity; transferase activity; binding; transferase activity, transferring phosphorus-containing groups;	K00888	PI4KA; phosphatidylinositol 4-kinase A [EC:2.7.1.67]	aor04070 Phosphatidylinositol signaling system - Aspergillus oryzae; aor04011 MAPK signaling pathway - yeast - Aspergillus oryzae; aor00562 Inositol phosphate metabolism - Aspergillus oryzae; aor01100 Metabolic pathways - Aspergillus oryzae;	IPR001263; IPR000403; IPR016024; IPR011009;	Phosphoinositide 3-kinase, accessory (PIK) domain; Phosphatidylinositol 3-/4-kinase, catalytic domain; Armadillo-type fold; Protein kinase-like domain;	[T]	KOG0902	Phosphatidylinositol 4-kinase
I8U8I7		0.525	Down	1.02303e-05	Ao3042_11490	16.875	17.543	34.9	5	6	5	cytosol
I8U8J6	"Tubulin-specific chaperone c, putative"	0.338	Down	0.00268633	Ao3042_11467	44.288	20.463	17.4	6	10	6	cytosol, nuclear	cellular component biogenesis; developmental process; cellular component organization; cellular developmental process; cellular protein metabolic process; single-organism cellular process; cellular component morphogenesis; single-organism process; primary metabolic process; cellular metabolic process; tubulin complex biogenesis; organic substance metabolic process; protein folding; cell morphogen…		tubulin binding; protein binding; cytoskeletal protein binding; binding;				IPR006599; IPR016098; IPR031925; IPR017901; IPR012945;	CARP motif; Cyclase-associated protein CAP/septum formation inhibitor MinC, C-terminal; Tubulin-specific chaperone C, N-terminal; C-CAP/cofactor C-like domain; Tubulin binding cofactor C-like domain;	[O]	KOG2512	Beta-tubulin folding cofactor C
I8U8V9	Cytosine deaminase FCY1	2.029	Up	0.000506135	Ao3042_11560	16.107	29.248	39.9	6	8	6	cytosol			cation binding; metal ion binding; hydrolase activity; zinc ion binding; transition metal ion binding; catalytic activity; binding; ion binding;	K01485	codA; cytosine deaminase [EC:3.5.4.1]	aor00240 Pyrimidine metabolism - Aspergillus oryzae; aor00330 Arginine and proline metabolism - Aspergillus oryzae; aor01100 Metabolic pathways - Aspergillus oryzae;	IPR016193; IPR002125;	Cytidine deaminase-like; Cytidine and deoxycytidylate deaminases, zinc-binding;	[F]	KOG1018	Cytosine deaminase FCY1 and related enzymes
I8U968	50S ribosomal subunit protein	0.505	Down	0.00638567	Ao3042_11253	34.277	38.317	23.1	6	11	6	mitochondria	cellular protein metabolic process; biosynthetic process; primary metabolic process; cellular metabolic process; organic substance biosynthetic process; cellular biosynthetic process; organic substance metabolic process; metabolic process; cellular macromolecule biosynthetic process; cellular macromolecule metabolic process; gene expression; macromolecule metabolic process; protein metabolic proc…	intracellular organelle; ribosome; intracellular non-membrane-bounded organelle; cytoplasm; intracellular organelle part; macromolecular complex; intracellular part; cell; organelle part; non-membrane-bounded organelle; organelle; large ribosomal subunit; ribosomal subunit; cell part; intracellular; ribonucleoprotein complex; cytoplasmic part;	structural constituent of ribosome; structural molecule activity;	K02876	RP-L15; large subunit ribosomal protein L15	aor03010 Ribosome - Aspergillus oryzae;	IPR021131;	Ribosomal protein L18e/L15P;	[J]	KOG0846	Mitochondrial/chloroplast ribosomal protein L15/L10
I8U9P5	Putative amino acid aldolase or racemase	1.636	Up	0.0488	Ao3042_08093	39.966	47.203	31.9	10	14	10	cytosol							IPR026956; IPR029066; IPR001608;	D-serine dehydratase-like domain; PLP-binding barrel; Alanine racemase, N-terminal;
I8U9S6		0.534	Down	3.78826e-06	Ao3042_05085	95.52	32.672	7.9	6	7	6	nuclear			ubiquitin-specific protease activity; peptidase activity; ubiquitinyl hydrolase activity; catalytic activity; peptidase activity, acting on L-amino acid peptides; ubiquitin-like protein-specific protease activity; cysteine-type peptidase activity; hydrolase activity; Lys48-specific deubiquitinase activity;				IPR033979;	MINDY deubiquitinase domain;	[S]	KOG2427	Uncharacterized conserved protein
J7MD64	Aspartyl aminopeptidase 1	1.615	Up	6.59681e-09	Aoape1	55.485	169.07	43.5	16	30	16	mitochondria	proteolysis; metabolic process; macromolecule metabolic process; protein metabolic process; primary metabolic process; organic substance metabolic process;		exopeptidase activity; peptidase activity; transition metal ion binding; catalytic activity; binding; ion binding; cation binding; metal ion binding; peptidase activity, acting on L-amino acid peptides; hydrolase activity; metallopeptidase activity; aminopeptidase activity; zinc ion binding;	K01268			IPR023358;	Peptidase M18, domain 2;	[E]	KOG2596	Aminopeptidase I zinc metalloprotease (M18)
P12547	Alkaline protease 1	4.274	Up	1e-32	alp1	42.571	225.06	42.7	13	120	13	extracellular	proteolysis; metabolic process; macromolecule metabolic process; protein metabolic process; primary metabolic process; organic substance metabolic process;	extracellular region;	serine-type endopeptidase activity; endopeptidase activity; peptidase activity; catalytic activity; serine hydrolase activity; serine-type peptidase activity; peptidase activity, acting on L-amino acid peptides; hydrolase activity;				IPR009020; IPR000209; IPR010259;	Proteinase propeptide inhibitor; Peptidase S8/S53 domain; Peptidase S8 propeptide/proteinase inhibitor I9;	[O]	KOG1153	Subtilisin-related protease/Vacuolar protease B
P41756	Phosphoglycerate kinase	0.275	Down	3.24896e-12	pgkA	44.383	241.49	74.8	34	132	34	cytosol	single-organism carbohydrate catabolic process; glycolytic process; single-organism catabolic process; small molecule metabolic process; single-organism cellular process; single-organism process; carbohydrate metabolic process; primary metabolic process; cellular metabolic process; organic substance metabolic process; carbohydrate catabolic process; single-organism carbohydrate metabolic process;…	intracellular part; cell; cell part; intracellular; cytoplasm;	ATP binding; nucleoside phosphate binding; nucleoside binding; ion binding; nucleotide binding; phosphotransferase activity, carboxyl group as acceptor; organic cyclic compound binding; heterocyclic compound binding; ribonucleoside binding; carbohydrate derivative binding; kinase activity; catalytic activity; ribonucleotide binding; binding; phosphoglycerate kinase activity; purine ribonucleoside…	K00927	PGK; phosphoglycerate kinase [EC:2.7.2.3]	aor01200 Carbon metabolism - Aspergillus oryzae; aor00010 Glycolysis / Gluconeogenesis - Aspergillus oryzae; aor01110 Biosynthesis of secondary metabolites - Aspergillus oryzae; aor01130 Biosynthesis of antibiotics - Aspergillus oryzae; aor01230 Biosynthesis of amino acids - Aspergillus oryzae; aor01100 Metabolic pathways - Aspergillus oryzae;	IPR015824; IPR015901;	Phosphoglycerate kinase, N-terminal; Phosphoglycerate kinase, C-terminal;	[G]	KOG1367	3-phosphoglycerate kinase
P46076	Neutral protease 2	2.885	Up	5.02531e-07	AO090010000493	37.501	109.65	23.6	7	16	7	extracellular	proteolysis; metabolic process; macromolecule metabolic process; protein metabolic process; primary metabolic process; organic substance metabolic process;	extracellular region;	endopeptidase activity; metalloendopeptidase activity; peptidase activity; catalytic activity; binding; ion binding; cation binding; metal ion binding; peptidase activity, acting on L-amino acid peptides; metallopeptidase activity; hydrolase activity;	K19305			IPR024079;	Metallopeptidase, catalytic domain;
P57749	Phosphoglucomutase	1.753	Up	1e-32	pgmA	60.356	312.15	56.9	28	99	28	cytosol	glucose metabolic process; single-organism carbohydrate metabolic process; metabolic process; single-organism metabolic process; monosaccharide metabolic process; single-organism process; primary metabolic process; carbohydrate metabolic process; organic substance metabolic process; hexose metabolic process;	intracellular part; cell; cell part; intracellular; cytoplasm;	magnesium ion binding; isomerase activity; catalytic activity; phosphoglucomutase activity; binding; intramolecular transferase activity, phosphotransferases; ion binding; metal ion binding; cation binding; intramolecular transferase activity;	K01835	pgm; phosphoglucomutase [EC:5.4.2.2]	aor00030 Pentose phosphate pathway - Aspergillus oryzae; aor00052 Galactose metabolism - Aspergillus oryzae; aor00010 Glycolysis / Gluconeogenesis - Aspergillus oryzae; aor01110 Biosynthesis of secondary metabolites - Aspergillus oryzae; aor00520 Amino sugar and nucleotide sugar metabolism - Aspergillus oryzae; aor01130 Biosynthesis of antibiotics - Aspergillus oryzae; aor00230 Purine metabolism …	IPR005846; IPR005843; IPR005845; IPR016055; IPR005844;	Alpha-D-phosphohexomutase, alpha/beta/alpha domain III; Alpha-D-phosphohexomutase, C-terminal; Alpha-D-phosphohexomutase, alpha/beta/alpha domain II; Alpha-D-phosphohexomutase, alpha/beta/alpha I/II/III; Alpha-D-phosphohexomutase, alpha/beta/alpha domain I;	[G]	KOG0625	Phosphoglucomutase
P60205	Calmodulin	0.224	Down	3.25e-12	cmdA	17.013	79.048	58.4	13	57	12	nuclear			cation binding; metal ion binding; calcium ion binding; binding; ion binding;	K02183	CALM; calmodulin	aor04070 Phosphatidylinositol signaling system - Aspergillus oryzae;	IPR002048; IPR011992;	EF-hand domain; EF-hand domain pair;	[T]	KOG0027	Calmodulin and related proteins (EF-Hand superfamily)
Q00248	Protein disulfide-isomerase	2.942	Up	3.24896e-12	pdiA	56.458	323.31	59.6	30	126	30	cytosol	regulation of cellular process; homeostatic process; regulation of biological quality; regulation of biological process; cell redox homeostasis; single-organism cellular process; cellular homeostasis; single-organism process; cellular process; biological regulation;	endoplasmic reticulum lumen; intracellular organelle; endoplasmic reticulum; cytoplasm; intracellular organelle part; endomembrane system; intracellular part; cell; extracellular region; organelle part; organelle; intracellular membrane-bounded organelle; membrane-enclosed lumen; intracellular organelle lumen; endoplasmic reticulum part; cell part; intracellular; membrane-bounded organelle; cytop…	intramolecular oxidoreductase activity, transposing S-S bonds; intramolecular oxidoreductase activity; isomerase activity; protein disulfide isomerase activity; catalytic activity;	K09580	PDIA1; protein disulfide-isomerase A1 [EC:5.3.4.1]	aor04141 Protein processing in endoplasmic reticulum - Aspergillus oryzae;	IPR005788; IPR013766; IPR012336;	Disulphide isomerase; Thioredoxin domain; Thioredoxin-like fold;	[O]	KOG0190	Protein disulfide isomerase (prolyl 4-hydroxylase beta subunit)
Q06902	Aspartic protease pep1	6.817	Up	1.95412e-09	pep1	42.313	63.716	27.2	8	24	8	extracellular	proteolysis; metabolic process; macromolecule metabolic process; protein metabolic process; primary metabolic process; organic substance metabolic process;	extracellular region;	endopeptidase activity; peptidase activity; catalytic activity; aspartic-type endopeptidase activity; peptidase activity, acting on L-amino acid peptides; hydrolase activity; aspartic-type peptidase activity;				IPR021109; IPR033121;	Aspartic peptidase domain; Peptidase family A1 domain;	[O]	KOG1339	Aspartyl protease
Q12558	Alpha-glucosidase	2.383	Up	0.0158	agdA	108.7	13.55	4.5	5	8	5	extracellular	metabolic process; cellular carbohydrate metabolic process; polysaccharide metabolic process; cellular macromolecule metabolic process; macromolecule metabolic process; primary metabolic process; carbohydrate metabolic process; cellular process; cellular metabolic process; cellular polysaccharide metabolic process; organic substance metabolic process;		transferase activity, transferring hexosyl groups; alpha-glucosidase activity; alpha-1,4-glucosidase activity; catalytic activity; binding; hydrolase activity, acting on glycosyl bonds; glucosidase activity; glucosyltransferase activity; hydrolase activity, hydrolyzing O-glycosyl compounds; carbohydrate binding; maltose alpha-glucosidase activity; transferase activity, transferring glycosyl group…	K01187	malZ; alpha-glucosidase [EC:3.2.1.20]	aor00052 Galactose metabolism - Aspergillus oryzae; aor00500 Starch and sucrose metabolism - Aspergillus oryzae; aor01100 Metabolic pathways - Aspergillus oryzae;	IPR011013; IPR031727; IPR017853;	Galactose mutarotase-like domain; Galactose mutarotase, N-terminal barrel; Glycoside hydrolase superfamily;	[G]	KOG1065	Maltase glucoamylase and related hydrolases, glycosyl hydrolase family 31
Q12560	Enolase	0.428	Down	3.25e-12	enoA	47.406	323.31	57.1	22	129	22	cytosol	single-organism carbohydrate catabolic process; glycolytic process; single-organism catabolic process; small molecule metabolic process; single-organism cellular process; single-organism process; carbohydrate metabolic process; primary metabolic process; cellular metabolic process; organic substance metabolic process; carbohydrate catabolic process; single-organism carbohydrate metabolic process;…	catalytic complex; cell part; intracellular; cytoplasm; macromolecular complex; intracellular part; cytosolic part; cell; cytosol; protein complex; phosphopyruvate hydratase complex; cytoplasmic part;	magnesium ion binding; phosphopyruvate hydratase activity; catalytic activity; binding; ion binding; metal ion binding; cation binding; lyase activity; hydro-lyase activity; carbon-oxygen lyase activity;	K01689	ENO; enolase [EC:4.2.1.11]	aor01200 Carbon metabolism - Aspergillus oryzae; aor00010 Glycolysis / Gluconeogenesis - Aspergillus oryzae; aor03018 RNA degradation - Aspergillus oryzae; aor01110 Biosynthesis of secondary metabolites - Aspergillus oryzae; aor01130 Biosynthesis of antibiotics - Aspergillus oryzae; aor00680 Methane metabolism - Aspergillus oryzae; aor01230 Biosynthesis of amino acids - Aspergillus oryzae; aor011…	IPR029065; IPR029017; IPR020810; IPR020811;	Enolase C-terminal domain-like; Enolase N-terminal domain-like; Enolase, C-terminal TIM barrel domain; Enolase, N-terminal;	[G]	KOG2670	Enolase
Q1PSK4	Serine/threonine protein kinase	0.406	Down	6.50095e-09	pk1	72.168	71.777	28.3	16	22	16	nuclear	phosphorylation; cellular protein metabolic process; primary metabolic process; cellular metabolic process; phosphate-containing compound metabolic process; organic substance metabolic process; metabolic process; protein phosphorylation; phosphorus metabolic process; cellular macromolecule metabolic process; cellular protein modification process; protein metabolic process; macromolecule metabolic…		ATP binding; nucleoside phosphate binding; phosphotransferase activity, alcohol group as acceptor; nucleoside binding; ion binding; nucleotide binding; protein kinase activity; organic cyclic compound binding; heterocyclic compound binding; ribonucleoside binding; carbohydrate derivative binding; kinase activity; ribonucleotide binding; catalytic activity; binding; purine ribonucleoside binding; …	K08286			IPR000719; IPR011009; IPR000961;	Protein kinase domain; Protein kinase-like domain; AGC-kinase, C-terminal;	[R]	KOG0605	NDR and related serine/threonine kinases
Q2MHH2	ATP-dependent DNA helicase II subunit 2	0.619	Down	0.00297187	ku80	81.741	40.474	17.2	11	15	11	cytosol	cellular component organization; cellular response to stress; regulation of biological quality; cellular aromatic compound metabolic process; DNA metabolic process; double-strand break repair; single-organism process; response to stimulus; cellular metabolic process; anatomical structure homeostasis; organic substance metabolic process; homeostatic process; metabolic process; heterocycle metaboli…	intracellular organelle; chromosome, telomeric region; intracellular non-membrane-bounded organelle; intracellular organelle part; macromolecular complex; intracellular part; cell; organelle part; chromosomal part; non-membrane-bounded organelle; intracellular membrane-bounded organelle; organelle; Ku70:Ku80 complex; chromosomal region; nucleus; intracellular; cell part; chromosome; membrane-boun…	nucleoside phosphate binding; ATP-dependent helicase activity; telomeric DNA binding; hydrolase activity, acting on acid anhydrides; hydrolase activity; ATPase activity; heterocyclic compound binding; organic cyclic compound binding; pyrophosphatase activity; catalytic activity; ribonucleotide binding; binding; ATP-dependent DNA helicase activity; purine ribonucleoside binding; damaged DNA bindin…	K10885	XRCC5; ATP-dependent DNA helicase 2 subunit 2	aor03450 Non-homologous end-joining - Aspergillus oryzae;	IPR005161; IPR006164; IPR016194; IPR005160; IPR014893; IPR002035;	Ku70/Ku80, N-terminal alpha/beta; Ku70/Ku80 beta-barrel domain; SPOC-like, C-terminal domain; Ku70/Ku80 C-terminal arm; Ku, C-terminal; von Willebrand factor, type A;	[L]	KOG2326	DNA-binding subunit of a DNA-dependent protein kinase (Ku80 autoantigen)
Q2MHH4	ATP-dependent DNA helicase II subunit 1	0.566	Down	3.62159e-05	ku70	73.616	68.22	28.7	15	18	15	nuclear	cellular component organization; cellular response to stress; regulation of biological quality; cellular aromatic compound metabolic process; DNA metabolic process; double-strand break repair; single-organism process; response to stimulus; cellular metabolic process; anatomical structure homeostasis; organic substance metabolic process; homeostatic process; metabolic process; heterocycle metaboli…	intracellular organelle; chromosome, telomeric region; intracellular non-membrane-bounded organelle; intracellular organelle part; macromolecular complex; intracellular part; cell; organelle part; chromosomal part; non-membrane-bounded organelle; intracellular membrane-bounded organelle; organelle; Ku70:Ku80 complex; chromosomal region; nucleus; intracellular; cell part; chromosome; membrane-boun…	nucleoside phosphate binding; ATP-dependent helicase activity; telomeric DNA binding; hydrolase activity, acting on acid anhydrides; hydrolase activity; ATPase activity; heterocyclic compound binding; organic cyclic compound binding; pyrophosphatase activity; catalytic activity; ribonucleotide binding; binding; ATP-dependent DNA helicase activity; purine ribonucleoside binding; damaged DNA bindin…	K10884	XRCC6; ATP-dependent DNA helicase 2 subunit 1	aor03450 Non-homologous end-joining - Aspergillus oryzae;	IPR005161; IPR003034; IPR006164; IPR016194; IPR005160; IPR002035; IPR027388;	Ku70/Ku80, N-terminal alpha/beta; SAP domain; Ku70/Ku80 beta-barrel domain; SPOC-like, C-terminal domain; Ku70/Ku80 C-terminal arm; von Willebrand factor, type A; Ku70, bridge and pillars domain;	[L]	KOG2327	DNA-binding subunit of a DNA-dependent protein kinase (Ku70 autoantigen)
Q2PIQ5	putative translation initiation inhibitor [Aspergillus oryzae 3.042]	1.674	Up	3.71445e-06	AO090206000110	15.135	51.051	57.1	4	7	4	mitochondria			deaminase activity; catalytic activity;				IPR013813;	Endoribonuclease L-PSP/chorismate mutase-like;	[J]	KOG2317	Putative translation initiation inhibitor UK114/IBM1
Q2PIQ7		0.278	Down	0.0043043	AO090206000108	37.169	26.968	23.5	6	6	6	nuclear				K17981
Q2PIS7	alpha-glucosidase [Aspergillus oryzae 3.042]	2.592	Up	1e-32	AO090206000080	60.101	84.657	36.2	19	34	19	cytosol			ligase activity, forming carbon-nitrogen bonds; hydrolase activity; carbon-nitrogen ligase activity, with glutamine as amido-N-donor; hydrolase activity, acting on carbon-nitrogen (but not peptide) bonds, in linear amides; catalytic activity; hydrolase activity, acting on carbon-nitrogen (but not peptide) bonds; ligase activity;				IPR023631;	Amidase signature domain;	[JIT]	KOG1212	Amidases
Q2PIU9	3-hydroxyacyl-CoA dehydrogenase [Aspergillus oryzae 3.042]	0.631	Down	4.27343e-11	AO090206000053	33.963	97.121	42	10	23	10	mitochondria	oxidation-reduction process; small molecule metabolic process; single-organism cellular process; single-organism process; cellular lipid metabolic process; fatty acid metabolic process; primary metabolic process; cellular metabolic process; organic substance metabolic process; metabolic process; single-organism metabolic process; carboxylic acid metabolic process; monocarboxylic acid metabolic pr…		nucleoside phosphate binding; ion binding; NAD+ binding; nucleotide binding; cofactor binding; oxidoreductase activity; heterocyclic compound binding; organic cyclic compound binding; oxidoreductase activity, acting on CH-OH group of donors; oxidoreductase activity, acting on the CH-OH group of donors, NAD or NADP as acceptor; NAD binding; catalytic activity; binding; anion binding; 3-hydroxyacyl…	K00074	paaH; 3-hydroxybutyryl-CoA dehydrogenase [EC:1.1.1.157]	aor00650 Butanoate metabolism - Aspergillus oryzae; aor00360 Phenylalanine metabolism - Aspergillus oryzae; aor01100 Metabolic pathways - Aspergillus oryzae;	IPR008927; IPR013328; IPR016040; IPR006176; IPR006108;	6-phosphogluconate dehydrogenase C-terminal domain-like; 6-phosphogluconate dehydrogenase, domain 2; NAD(P)-binding domain; 3-hydroxyacyl-CoA dehydrogenase, NAD binding; 3-hydroxyacyl-CoA dehydrogenase, C-terminal;	[I]	KOG2304	3-hydroxyacyl-CoA dehydrogenase
Q2PIV5	60S ribosomal protein L13	0.313	Down	1e-32	AO090206000047	25.677	133.15	58.8	20	88	20	nuclear	cellular protein metabolic process; biosynthetic process; primary metabolic process; cellular metabolic process; organic substance biosynthetic process; cellular biosynthetic process; organic substance metabolic process; metabolic process; cellular macromolecule biosynthetic process; cellular macromolecule metabolic process; gene expression; macromolecule metabolic process; protein metabolic proc…	ribosome; organelle; intracellular organelle; intracellular non-membrane-bounded organelle; cell part; intracellular; cytoplasm; macromolecular complex; intracellular part; cell; ribonucleoprotein complex; cytoplasmic part; non-membrane-bounded organelle;	structural constituent of ribosome; structural molecule activity;	K02873	RP-L13e; large subunit ribosomal protein L13e	aor03010 Ribosome - Aspergillus oryzae;			[J]	KOG3295	60S Ribosomal protein L13
Q2PIX6	"26S proteasome regulatory complex, ATPase RPT6 [Aspergillus oryzae 3.042]"	0.343	Down	4.44089e-16	AO090206000022	43.417	180.78	52.7	17	43	15	cytoskeleton	organic substance catabolic process; metabolic process; protein catabolic process; macromolecule catabolic process; macromolecule metabolic process; protein metabolic process; primary metabolic process; catabolic process; organic substance metabolic process;	intracellular part; cell; cell part; intracellular; cytoplasm;	ATP binding; nucleoside phosphate binding; nucleoside binding; ion binding; hydrolase activity, acting on acid anhydrides; hydrolase activity; nucleotide binding; nucleoside-triphosphatase activity; organic cyclic compound binding; heterocyclic compound binding; ribonucleoside binding; carbohydrate derivative binding; pyrophosphatase activity; catalytic activity; ribonucleotide binding; binding; …	K03066	PSMC5; 26S proteasome regulatory subunit T6	aor03050 Proteasome - Aspergillus oryzae;	IPR003593; IPR003959; IPR027417;	AAA+ ATPase domain; ATPase, AAA-type, core; P-loop containing nucleoside triphosphate hydrolase;	[O]	KOG0728	26S proteasome regulatory complex, ATPase RPT6
Q2PIY2	"Cytochrome c oxidase assembly protein cox16, mitochondrial"	0.269	Down	0.00468	cox16	15.567	5.8821	15.7	2	3	2	mitochondria		membrane; intracellular organelle; mitochondrial part; organelle membrane; organelle envelope; intracellular organelle part; cytoplasm; intrinsic component of membrane; intracellular part; cell; integral component of membrane; organelle part; mitochondrion; mitochondrial envelope; intracellular membrane-bounded organelle; organelle; membrane part; cell part; intracellular; envelope; organelle inn…		K18182
Q2PIZ0	AAA+-type ATPase [Aspergillus oryzae 3.042]	0.636	Down	0.0478	AO090206000004	83.478	18.547	10.2	6	6	6	cytosol, nuclear			ATP binding; nucleoside phosphate binding; nucleoside binding; ion binding; hydrolase activity, acting on acid anhydrides; hydrolase activity; nucleotide binding; nucleoside-triphosphatase activity; organic cyclic compound binding; heterocyclic compound binding; ribonucleoside binding; carbohydrate derivative binding; pyrophosphatase activity; catalytic activity; ribonucleotide binding; binding; …	K14575	AFG2; AAA family ATPase	aor03008 Ribosome biogenesis in eukaryotes - Aspergillus oryzae;	IPR003593; IPR003959; IPR027417;	AAA+ ATPase domain; ATPase, AAA-type, core; P-loop containing nucleoside triphosphate hydrolase;	[O]	KOG0730	AAA+-type ATPase
Q2PIZ1	GTP-binding protein [Aspergillus oryzae 3.042]	0.626	Down	5.07155e-05	AO090206000003	22.859	33.436	40.3	8	14	6	cytosol, nuclear	regulation of cellular process; single organism signaling; cellular response to stimulus; intracellular signal transduction; single-organism cellular process; single-organism process; organic substance transport; small GTPase mediated signal transduction; signaling; response to stimulus; protein transport; establishment of localization; establishment of protein localization; transport; signal tra…		nucleoside phosphate binding; nucleoside binding; ion binding; nucleotide binding; organic cyclic compound binding; heterocyclic compound binding; ribonucleoside binding; carbohydrate derivative binding; ribonucleotide binding; binding; purine ribonucleoside binding; anion binding; purine ribonucleotide binding; purine nucleoside binding; guanyl ribonucleotide binding; guanyl nucleotide binding; …	K07901	RAB8A; Ras-related protein Rab-8A	aor04144 Endocytosis - Aspergillus oryzae;	IPR005225; IPR027417;	Small GTP-binding protein domain; P-loop containing nucleoside triphosphate hydrolase;	[TU]	KOG0078	GTP-binding protein SEC4, small G protein superfamily, and related Ras family GTP-binding proteins
Q2TVX9	Actin binding protein	0.259	Down	3.24896e-12	Aoabp1	84.5	83.89	29.6	22	44	22	mitochondria		cell; intracellular; cell part;	actin binding; protein binding; cytoskeletal protein binding; binding;	K20520			IPR001452; IPR002108; IPR029006;	SH3 domain; Actin-depolymerising factor homology domain; ADF-H/Gelsolin-like domain;	[Z]	KOG3655	Drebrins and related actin binding proteins
Q2TVY5	exocyst subunit - Sec10p [Aspergillus oryzae 3.042]	0.418	Down	9.89116e-06	AO090010000771	98.692	24.54	6.9	7	11	7	nuclear	vesicle-mediated transport; single-organism cellular process; single-organism process; vesicle docking; membrane docking; cellular localization; establishment of localization; transport; establishment of localization in cell; single-organism localization; secretion by cell; localization; cellular process; exocytosis; secretion; single-organism transport;	intracellular part; cell; cell part; intracellular; cytoplasm;		K19984					[U]	KOG3745	Exocyst subunit - Sec10p
Q2TVZ2	Translation machinery-associated protein 22	0.602	Down	0.000327	tma22	21.287	28.353	31.4	6	8	6	cytosol	cellular protein metabolic process; biosynthetic process; primary metabolic process; organic substance biosynthetic process; cellular metabolic process; cellular biosynthetic process; organic substance metabolic process; metabolic process; cellular macromolecule biosynthetic process; translational initiation; cellular macromolecule metabolic process; gene expression; macromolecule metabolic proce…	ribosome; organelle; intracellular organelle; intracellular non-membrane-bounded organelle; cell part; intracellular; cytoplasm; macromolecular complex; intracellular part; cell; ribonucleoprotein complex; cytoplasmic part; non-membrane-bounded organelle;	organic cyclic compound binding; heterocyclic compound binding; RNA binding; translation factor activity, nucleic acid binding; binding; nucleic acid binding; translation initiation factor activity;				IPR001950;	SUI1 domain;	[R]	KOG3239	Density-regulated protein related to translation initiation factor 1 (eIF-1/SUI1)
Q2TW27		0.331	Down	3.38329e-12	AO090010000729	81.497	93.655	26.4	15	23	15	extracellular	proteolysis; metabolic process; macromolecule metabolic process; protein metabolic process; primary metabolic process; organic substance metabolic process;		peptidase activity, acting on L-amino acid peptides; hydrolase activity; peptidase activity; catalytic activity; serine hydrolase activity; serine-type peptidase activity;				IPR005151; IPR029045;	Tail specific protease; ClpP/crotonase-like domain;
Q2TW34	Catalase-peroxidase	7.767	Up	1e-32	katG	82.627	208.29	38.9	24	43	24	nuclear	response to stress; single-organism catabolic process; oxidation-reduction process; single-organism cellular process; single-organism process; response to stimulus; cellular metabolic process; metabolic process; hydrogen peroxide metabolic process; reactive oxygen species metabolic process; single-organism metabolic process; response to oxidative stress; cellular catabolic process; catabolic proc…	intracellular part; cell; cell part; intracellular; cytoplasm;	organic cyclic compound binding; heterocyclic compound binding; heme binding; catalytic activity; binding; ion binding; antioxidant activity; cation binding; metal ion binding; catalase activity; peroxidase activity; tetrapyrrole binding; oxidoreductase activity; oxidoreductase activity, acting on peroxide as acceptor;	K03782	katG; catalase-peroxidase [EC:1.11.1.21]	aor01110 Biosynthesis of secondary metabolites - Aspergillus oryzae; aor00380 Tryptophan metabolism - Aspergillus oryzae; aor00360 Phenylalanine metabolism - Aspergillus oryzae; aor01100 Metabolic pathways - Aspergillus oryzae;	IPR002016;	Haem peroxidase, plant/fungal/bacterial;
Q2TW68	nucleoside-diphosphate-sugar epimerase [Aspergillus oryzae 3.042]	2.254	Up	0.000126094	AO090010000686	38.625	65.972	31.9	10	12	10	cytosol	metabolic process; cellular metabolic process; cellular process;		cofactor binding; catalytic activity; binding; coenzyme binding;				IPR016040;	NAD(P)-binding domain;
Q2TW80		2.151	Up	5.79e-07	AO090010000669	28.589	40.111	39.7	9	18	9	nuclear
Q2TW82	C-4 sterol methyl oxidase [Aspergillus oryzae 3.042]	0.247	Down	0.00056226	AO090010000667	34.236	28.331	19.7	4	8	4	plasma membrane	single-organism biosynthetic process; organic acid biosynthetic process; oxidation-reduction process; small molecule metabolic process; single-organism cellular process; single-organism process; biosynthetic process; cellular lipid metabolic process; fatty acid metabolic process; primary metabolic process; cellular metabolic process; fatty acid biosynthetic process; organic substance biosynthetic…	intrinsic component of membrane; membrane; integral component of membrane; membrane part;	iron ion binding; transition metal ion binding; catalytic activity; binding; ion binding; metal ion binding; cation binding; oxidoreductase activity;	K07750	E1.14.13.72; methylsterol monooxygenase [EC:1.14.13.72]	aor01130 Biosynthesis of antibiotics - Aspergillus oryzae; aor00100 Steroid biosynthesis - Aspergillus oryzae; aor01100 Metabolic pathways - Aspergillus oryzae;	IPR006694;	Fatty acid hydroxylase;	[I]	KOG0873	C-4 sterol methyl oxidase
Q2TW88	"2-keto-4-pentenoate hydratase/2-oxohepta-3-ene-1,7-dioic acid hydratase [Aspergillus oryzae 3.042]"	0.647	Down	7.11567e-07	AO090010000659	31.025	73.233	49.3	11	18	11	cytoskeleton	metabolic process;		catalytic activity;				IPR011234;	Fumarylacetoacetase, C-terminal-related;	[R]	KOG1535	Predicted fumarylacetoacetate hydralase
Q2TW95	putative oxidoreductase related to nitroreductase [Aspergillus oryzae 3.042]	3.031	Up	1.50561e-07	AO090010000649	23.169	30.948	41.3	7	9	7	mitochondria	cellular response to stress; cellular response to stimulus; response to chemical; response to stress; response to oxidative stress; cellular response to oxidative stress; response to stimulus; cellular process; cellular response to chemical stimulus;		oxidoreductase activity, acting on NAD(P)H; catalytic activity; oxidoreductase activity, acting on NAD(P)H, nitrogenous group as acceptor; oxidoreductase activity;	K07078			IPR000415; IPR033877; IPR029479;	Nitroreductase-like; Nitroreductase Frm2/Hbn1-like; Nitroreductase;
Q2TWC6	putative O-methyltransferase [Aspergillus oryzae 3.042]	0.211	Down	0.00622087	AO090010000617	24.748	37.53	34.2	8	9	7	cytosol			transferase activity, transferring one-carbon groups; O-methyltransferase activity; methyltransferase activity; catalytic activity; transferase activity;				IPR029063;	S-adenosyl-L-methionine-dependent methyltransferase;
Q2TWF6	glyoxylate/hydroxypyruvate reductase [Aspergillus oryzae 3.042]	4.062	Up	1e-32	AO090010000579	43.189	213.53	58.3	21	69	19	mitochondria	single-organism process; metabolic process; oxidation-reduction process; single-organism metabolic process;		nucleoside phosphate binding; oxidoreductase activity, acting on the aldehyde or oxo group of donors; nucleotide binding; cofactor binding; oxidoreductase activity; oxidoreductase activity, acting on CH-OH group of donors; oxidoreductase activity, acting on the aldehyde or oxo group of donors, NAD or NADP as acceptor; heterocyclic compound binding; organic cyclic compound binding; oxidoreductase …	K00122	FDH; formate dehydrogenase [EC:1.2.1.2]	aor01200 Carbon metabolism - Aspergillus oryzae; aor00630 Glyoxylate and dicarboxylate metabolism - Aspergillus oryzae; aor00680 Methane metabolism - Aspergillus oryzae; aor01100 Metabolic pathways - Aspergillus oryzae;	IPR006139; IPR006140; IPR016040;	D-isomer specific 2-hydroxyacid dehydrogenase, catalytic domain; D-isomer specific 2-hydroxyacid dehydrogenase, NAD-binding domain; NAD(P)-binding domain;	[C]	KOG0069	Glyoxylate/hydroxypyruvate reductase (D-isomer-specific 2-hydroxy acid dehydrogenase superfamily)
Q2TWI6	putative oxidoreductase related to nitroreductase [Aspergillus oryzae 3.042]	3.604	Up	3.24984e-12	AO090010000541	24.327	97.878	69.4	13	30	13	cytosol	cellular response to stress; cellular response to stimulus; response to chemical; response to stress; response to oxidative stress; cellular response to oxidative stress; response to stimulus; cellular process; cellular response to chemical stimulus;		oxidoreductase activity, acting on NAD(P)H; catalytic activity; oxidoreductase activity, acting on NAD(P)H, nitrogenous group as acceptor; oxidoreductase activity;	K07078			IPR000415; IPR033877; IPR029479;	Nitroreductase-like; Nitroreductase Frm2/Hbn1-like; Nitroreductase;
Q2TWJ0		1.905	Up	7.69e-10	AO090010000537	29.585	37.52	37	8	14	8	cytosol, nuclear
Q2TWJ3	Carboxypeptidase	6.636	Up	0.00146254	AO090010000534	59.744	33.029	8.6	3	3	3	extracellular	proteolysis; metabolic process; macromolecule metabolic process; protein metabolic process; primary metabolic process; organic substance metabolic process;		carboxypeptidase activity; peptidase activity; exopeptidase activity; catalytic activity; serine hydrolase activity; serine-type peptidase activity; peptidase activity, acting on L-amino acid peptides; hydrolase activity; serine-type carboxypeptidase activity; serine-type exopeptidase activity;	K01288			IPR029058;	Alpha/Beta hydrolase fold;	[OE]	KOG1282	Serine carboxypeptidases (lysosomal cathepsin A)
Q2TWJ4	putative nucleoside-diphosphate-sugar epimerase [Aspergillus oryzae 3.042]	2.377	Up	1.02e-06	AO090010000533	34.03	37.643	29.9	10	13	10	cytosol							IPR016040; IPR008030;	NAD(P)-binding domain; NmrA-like domain;
Q2TWJ5		1.52	Up	0.008072	AO090010000532	26.925	6.6137	7.7	2	2	2	mitochondria
Q2TWK8	adenosylmethionine-8-amino-7-oxononanoate aminotransferase [Aspergillus oryzae 3.042]	2.359	Up	0.0144	AO090010000518	54.222	33.579	22.6	8	9	8	mitochondria			organic cyclic compound binding; heterocyclic compound binding; transferase activity, transferring nitrogenous groups; catalytic activity; binding; ion binding; anion binding; transaminase activity; transferase activity; cofactor binding; pyridoxal phosphate binding;				IPR015424; IPR015422; IPR015421;	Pyridoxal phosphate-dependent transferase; Pyridoxal phosphate-dependent transferase, major region, subdomain 2; Pyridoxal phosphate-dependent transferase, major region, subdomain 1;	[E]	KOG1404	Alanine-glyoxylate aminotransferase AGT2
Q2TWM1	Pectin lyase 1	4.55	Up	0.0386799	pel1	39.94	8.6473	9.2	3	4	3	extracellular	organic substance catabolic process; metabolic process; galacturonan metabolic process; polysaccharide metabolic process; macromolecule catabolic process; pectin metabolic process; pectin catabolic process; macromolecule metabolic process; polysaccharide catabolic process; primary metabolic process; carbohydrate metabolic process; catabolic process; organic substance metabolic process; carbohydra…	extracellular region;	lyase activity; carbon-oxygen lyase activity, acting on polysaccharides; pectin lyase activity; catalytic activity; carbon-oxygen lyase activity;	K01732			IPR011050; IPR002022; IPR012334;	Pectin lyase fold/virulence factor; Pectate lyase/Amb allergen; Pectin lyase fold;
Q2TWN5	hydroxymethylglutaryl-CoA synthase [Aspergillus oryzae 3.042]	0.3	Down	2.09046e-06	AO090010000487	50.54	27.859	17	6	13	5	cytosol	isoprenoid metabolic process; single-organism biosynthetic process; single-organism cellular process; single-organism process; biosynthetic process; cellular lipid metabolic process; primary metabolic process; organic substance biosynthetic process; cellular metabolic process; cellular biosynthetic process; organic substance metabolic process; lipid biosynthetic process; isoprenoid biosynthetic p…		hydroxymethylglutaryl-CoA synthase activity; transferase activity, transferring acyl groups; catalytic activity; transferase activity; transferase activity, transferring acyl groups, acyl groups converted into alkyl on transfer;	K01641	E2.3.3.10; hydroxymethylglutaryl-CoA synthase [EC:2.3.3.10]	aor00280 Valine, leucine and isoleucine degradation - Aspergillus oryzae; aor01110 Biosynthesis of secondary metabolites - Aspergillus oryzae; aor00650 Butanoate metabolism - Aspergillus oryzae; aor01130 Biosynthesis of antibiotics - Aspergillus oryzae; aor00900 Terpenoid backbone biosynthesis - Aspergillus oryzae; aor00072 Synthesis and degradation of ketone bodies - Aspergillus oryzae; aor01100…	IPR013746; IPR016039; IPR013528;	Hydroxymethylglutaryl-coenzyme A synthase C-terminal domain; Thiolase-like; Hydroxymethylglutaryl-coenzyme A synthase, N-terminal;	[I]	KOG1393	Hydroxymethylglutaryl-CoA synthase
Q2TWP9	PPR repeat protein [Aspergillus oryzae 3.042]	0.267	Down	6.22246e-05	AO090010000472	130.29	72.006	18.4	20	24	20	mitochondria			protein binding; binding;				IPR011990; IPR033443;	Tetratricopeptide-like helical domain; Pentacotripeptide-repeat region of PROPR;	[R]	KOG4197	FOG: PPR repeat
Q2TWQ0	phosphomevalonate kinase [Aspergillus oryzae 3.042]	0.253	Down	2.00096e-10	AO090010000471	52.571	107.49	40.4	16	28	16	extracellular			ATP binding; nucleoside phosphate binding; nucleoside binding; ion binding; nucleotide binding; organic cyclic compound binding; heterocyclic compound binding; ribonucleoside binding; carbohydrate derivative binding; kinase activity; catalytic activity; ribonucleotide binding; binding; purine ribonucleoside binding; anion binding; purine ribonucleotide binding; adenyl ribonucleotide binding; aden…	K00938	E2.7.4.2; phosphomevalonate kinase [EC:2.7.4.2]	aor01110 Biosynthesis of secondary metabolites - Aspergillus oryzae; aor01130 Biosynthesis of antibiotics - Aspergillus oryzae; aor00900 Terpenoid backbone biosynthesis - Aspergillus oryzae; aor01100 Metabolic pathways - Aspergillus oryzae;	IPR020568; IPR006204; IPR014721; IPR013750;	Ribosomal protein S5 domain 2-type fold; GHMP kinase N-terminal domain; Ribosomal protein S5 domain 2-type fold, subgroup; GHMP kinase, C-terminal domain;	[I]	KOG4519	Phosphomevalonate kinase
Q2TWQ5	glycolipid 2-alpha-mannosyltransferase [Aspergillus oryzae 3.042]	1.694	Up	0.0111375	AO090010000465	46.906	40.095	26.1	9	11	9	Golgi apparatus	protein glycosylation; macromolecule glycosylation; glycoprotein biosynthetic process; single-organism cellular process; cellular protein metabolic process; glycoprotein metabolic process; single-organism process; biosynthetic process; primary metabolic process; carbohydrate metabolic process; cellular metabolic process; organic substance biosynthetic process; cellular biosynthetic process; organ…	membrane;	transferase activity, transferring glycosyl groups; mannosyltransferase activity; transferase activity, transferring hexosyl groups; catalytic activity; transferase activity;	K10967	KTR1_3; alpha 1,2-mannosyltransferase [EC:2.4.1.-]	aor00514 Other types of O-glycan biosynthesis - Aspergillus oryzae;	IPR029044;	Nucleotide-diphospho-sugar transferases;	[G]	KOG4472	Glycolipid 2-alpha-mannosyltransferase (alpha-1,2-mannosyltransferase)
Q2TWQ6	topoisomerase II associated protein [Aspergillus oryzae 3.042]	0.412	Down	0.000248772	AO090010000464	92.45	49.856	11.7	9	12	9	plasma membrane				K12617	PATL1; DNA topoisomerase 2-associated protein PAT1	aor03018 RNA degradation - Aspergillus oryzae;			[S]	KOG4592	Uncharacterized conserved protein
Q2TWQ7	UDP-glucose 4-epimerase/UDP-sulfoquinovose synthase [Aspergillus oryzae 3.042]	0.531	Down	3.24896e-12	AO090010000463	40.696	260	72.2	26	116	26	cytosol	single-organism carbohydrate metabolic process; metabolic process; single-organism metabolic process; monosaccharide metabolic process; single-organism process; primary metabolic process; carbohydrate metabolic process; cellular metabolic process; cellular process; galactose metabolic process; organic substance metabolic process; hexose metabolic process;		isomerase activity; catalytic activity; racemase and epimerase activity; racemase and epimerase activity, acting on carbohydrates and derivatives; binding; cofactor binding; UDP-glucose 4-epimerase activity; coenzyme binding;	K01784	galE; UDP-glucose 4-epimerase [EC:5.1.3.2]	aor00052 Galactose metabolism - Aspergillus oryzae; aor00520 Amino sugar and nucleotide sugar metabolism - Aspergillus oryzae; aor01100 Metabolic pathways - Aspergillus oryzae;	IPR016040;	NAD(P)-binding domain;	[M]	KOG1371	UDP-glucose 4-epimerase/UDP-sulfoquinovose synthase
Q2TWS1		0.119	Down	7.57478e-05	AO090010000445	36.013	79.714	32.4	5	11	5	cytosol, nuclear
Q2TWZ1	period circadian protein [Aspergillus oryzae 3.042]	0.471	Down	0.0291574	AO090010000354	29.93	5.1172	3.4	1	4	1	nuclear
Q2TXA5	opsin-1 [Aspergillus oryzae 3.042]	0.295	Down	7.6957e-08	AO090010000221	34.101	13.3	10.3	4	12	4	plasma membrane	transport; single-organism localization; ion transport; single-organism process; localization; establishment of localization; single-organism transport;	intrinsic component of membrane; membrane; integral component of membrane; membrane part;	ion transmembrane transporter activity; substrate-specific channel activity; passive transmembrane transporter activity; substrate-specific transporter activity; ion channel activity; channel activity; substrate-specific transmembrane transporter activity; transmembrane transporter activity; transporter activity;
Q2TXB5	RPEL repeat protein [Aspergillus oryzae 3.042]	0.344	Down	7.32e-06	AO090010000210	16.259	59.898	68.1	8	18	8	nuclear
Q2TXC2	molecular chaperone [Aspergillus oryzae 3.042]	0.57	Down	1.91656e-08	AO090010000203	53.852	122.84	43.6	16	27	16	cytosol							IPR026894; IPR001623;	DNAJ-containing protein, X-domain; DnaJ domain;	[O]	KOG0691	Molecular chaperone (DnaJ superfamily)
Q2TXD5		2.32	Up	0.0187825	AO090010000188	62.151	20.124	14.5	8	11	8	nuclear							IPR020864;	Membrane attack complex component/perforin (MACPF) domain;
Q2TXF4	"lactonohydrolase, putative [Aspergillus oryzae 3.042]"	3.657	Up	6.43929e-15	AO090010000167	50.947	153.84	31.8	10	24	10	extracellular							IPR013658; IPR011042;	SMP-30/Gluconolactonase/LRE-like region; Six-bladed beta-propeller, TolB-like;
Q2TXF5	putative acyl esterase [Aspergillus oryzae 3.042]	4.24	Up	1e-32	AO090010000166	21.662	99.109	48.7	11	65	11	cytosol							IPR011051; IPR013096; IPR014710;	RmlC-like cupin domain; Cupin 2, conserved barrel; RmlC-like jelly roll fold;
Q2TXF8	lactonohydrolase [Aspergillus oryzae 3.042]	5.558	Up	0.000514917	AO090010000163	16.382	7.9515	16.6	2	3	2	cytosol							IPR013658; IPR011042;	SMP-30/Gluconolactonase/LRE-like region; Six-bladed beta-propeller, TolB-like;
Q2TXG0	uncharacterized protein involved in propionate catabolism [Aspergillus oryzae 3.042]	6.071	Up	3.24896e-12	AO090010000161	51.85	192.46	54.6	17	35	17	cytosol	single-organism process; cellular lipid metabolic process; cellular metabolic process; organic substance metabolic process; metabolic process; monocarboxylic acid metabolic process; cellular catabolic process; cellular process; lipid metabolic process; propionate metabolic process; short-chain fatty acid catabolic process; lipid catabolic process; single-organism catabolic process; small molecule…		lyase activity; hydro-lyase activity; catalytic activity; carbon-oxygen lyase activity; 2-methylcitrate dehydratase activity;	K17724	IRG1; aconitate decarboxylase [EC:4.1.1.6]	aor00660 C5-Branched dibasic acid metabolism - Aspergillus oryzae;
Q2TXG4	uncharacterized protein involved in propionate catabolism [Aspergillus oryzae 3.042]	5.167	Up	1e-32	AO090010000155	54.433	142.91	56.2	28	76	28	cytosol	propionate catabolic process, 2-methylcitrate cycle; single-organism process; cellular lipid metabolic process; cellular metabolic process; organic substance metabolic process; metabolic process; monocarboxylic acid metabolic process; cellular catabolic process; cellular process; lipid metabolic process; propionate metabolic process; short-chain fatty acid catabolic process; lipid catabolic proce…		2 iron, 2 sulfur cluster binding; catalytic activity; binding; iron-sulfur cluster binding; lyase activity; hydro-lyase activity; carbon-oxygen lyase activity; 2-methylcitrate dehydratase activity; metal cluster binding;	K01720	prpD; 2-methylcitrate dehydratase [EC:4.2.1.79]	aor00640 Propanoate metabolism - Aspergillus oryzae;
Q2TXM6	glycolate oxidase [Aspergillus oryzae 3.042]	4.502	Up	2.50994e-06	AO090010000085	41.295	16.239	18.1	6	10	6	cytosol	single-organism process; metabolic process; oxidation-reduction process; single-organism metabolic process;		nucleoside phosphate binding; ion binding; nucleotide binding; cofactor binding; oxidoreductase activity; heterocyclic compound binding; organic cyclic compound binding; carbohydrate derivative binding; ribonucleotide binding; catalytic activity; binding; anion binding; FMN binding; coenzyme binding; small molecule binding;				IPR013785; IPR000262;	Aldolase-type TIM barrel; FMN-dependent dehydrogenase;	[C]	KOG0538	Glycolate oxidase
Q2TXP1	phospholipase/carboxylesterase [Aspergillus oryzae 3.042]	2.606	Up	0.00016964	AO090010000069	26.166	22.876	27	5	5	5	mitochondria							IPR029058; IPR005645;	Alpha/Beta hydrolase fold; Serine hydrolase FSH;
Q2TXT6		0.182	Down	1e-32	AO090010000018	16.359	52.502	49.6	11	27	11	nuclear	regulation of biological quality; cytolysis; killing by symbiont of host cells; symbiosis, encompassing mutualism through parasitism; multi-organism cellular process; modification of morphology or physiology of other organism; interaction with host; multi-organism process; disruption by symbiont of host cell; modification of morphology or physiology of other organism involved in symbiotic interac…
Q2TXX0	glutathione S-transferase [Aspergillus oryzae 3.042]	1.649	Up	0.0158426	AO090103000485	26.18	36.009	33.6	7	10	7	nuclear			protein binding; binding;	K00799	GST; glutathione S-transferase [EC:2.5.1.18]	aor00480 Glutathione metabolism - Aspergillus oryzae;	IPR010987; IPR012336; IPR004045;	Glutathione S-transferase, C-terminal-like; Thioredoxin-like fold; Glutathione S-transferase, N-terminal;	[O]	KOG0406	Glutathione S-transferase
Q2TXY5		0.201	Down	2.4869e-14	AO090103000465	23.643	156.88	72.5	12	28	12	cytosol
Q2TXY7	"pectin lyase precursor, putative [Aspergillus oryzae 3.042]"	2.902	Up	4.61187e-12	AO090103000463	40.936	58.441	33.3	11	18	11	extracellular				K01732			IPR011050; IPR002022; IPR012334;	Pectin lyase fold/virulence factor; Pectate lyase/Amb allergen; Pectin lyase fold;
Q2TXZ2	FAD/FMN-containing dehydrogenase [Aspergillus oryzae 3.042]	0.351	Down	1.52074e-09	AO090103000453	58.818	33.894	15.3	7	10	7	mitochondria	single-organism process; metabolic process; oxidation-reduction process; single-organism metabolic process;		UDP-N-acetylmuramate dehydrogenase activity; nucleoside phosphate binding; flavin adenine dinucleotide binding; ion binding; nucleotide binding; cofactor binding; oxidoreductase activity; oxidoreductase activity, acting on CH-OH group of donors; heterocyclic compound binding; organic cyclic compound binding; oxidoreductase activity, acting on the CH-OH group of donors, NAD or NADP as acceptor; ca…				IPR016166; IPR016169; IPR006094;	FAD-binding, type 2; CO dehydrogenase flavoprotein-like, FAD-binding, subdomain 2; FAD linked oxidase, N-terminal;	[R]	KOG1262	FAD-binding protein DIMINUTO
Q2TXZ7	selenocysteine lyase [Aspergillus oryzae 3.042]	0.351	Down	1.69e-05	AO090103000448	47.884	24.624	12.6	5	7	5	cytosol			organic cyclic compound binding; heterocyclic compound binding; catalytic activity; binding; ion binding; lyase activity; anion binding; cofactor binding; pyridoxal phosphate binding;				IPR015424; IPR000192; IPR015421;	Pyridoxal phosphate-dependent transferase; Aminotransferase class V domain; Pyridoxal phosphate-dependent transferase, major region, subdomain 1;	[E]	KOG1549	Cysteine desulfurase NFS1
Q2TY34	Kinesin-like protein	0.358	Down	1.15326e-10	AO090103000408	103.33	76.097	25.6	22	28	22	nuclear	single-organism cellular process; microtubule-based movement; movement of cell or subcellular component; single-organism process; cellular process; microtubule-based process;	intracellular organelle; microtubule; intracellular non-membrane-bounded organelle; cytoskeletal part; intracellular organelle part; macromolecular complex; intracellular part; microtubule associated complex; cell; organelle part; kinesin complex; non-membrane-bounded organelle; organelle; cytoskeleton; microtubule cytoskeleton; cell part; intracellular; protein complex;	motor activity; nucleoside phosphate binding; hydrolase activity, acting on acid anhydrides; protein binding; hydrolase activity; organic cyclic compound binding; heterocyclic compound binding; cytoskeletal protein binding; pyrophosphatase activity; catalytic activity; ribonucleotide binding; microtubule binding; binding; purine ribonucleoside binding; anion binding; adenyl ribonucleotide binding…	K10396	KIF5; kinesin family member 5	aor04144 Endocytosis - Aspergillus oryzae;	IPR027417; IPR001752;	P-loop containing nucleoside triphosphate hydrolase; Kinesin motor domain;	[Z]	KOG0240	Kinesin (SMY1 subfamily)
Q2TY54		0.223	Down	0.0481693	AO090103000387	39.23	16.552	16.8	5	7	5	cytosol			catalytic activity; transferase activity; transferase activity, transferring phosphorus-containing groups;				IPR002575; IPR011009;	Aminoglycoside phosphotransferase; Protein kinase-like domain;
Q2TY57	carnitine-acylcarnitine carrier protein [Aspergillus oryzae 3.042]	0.375	Down	4.52e-06	AO090103000383	34.367	75.561	22.9	6	12	6	plasma membrane	transport; localization; establishment of localization;	intrinsic component of membrane; membrane; integral component of membrane; membrane part;		K15109			IPR023395;	Mitochondrial carrier domain;	[C]	KOG0758	Mitochondrial carnitine-acylcarnitine carrier protein
Q2TY58		0.294	Down	0.00213497	AO090103000382	35.324	8.4073	6.7	2	5	2	cytosol, nuclear	regulation of cellular process; regulation of gene expression; regulation of transcription, DNA-templated; regulation of cellular biosynthetic process; regulation of primary metabolic process; regulation of macromolecule metabolic process; regulation of nucleobase-containing compound metabolic process; regulation of transcription from RNA polymerase II promoter; regulation of macromolecule biosyn…	intracellular organelle; intracellular organelle part; nuclear lumen; macromolecular complex; intracellular part; cell; organelle part; membrane-enclosed lumen; organelle; intracellular membrane-bounded organelle; nucleoplasm; nucleus; intracellular organelle lumen; mediator complex; cell part; intracellular; membrane-bounded organelle; protein complex; nucleoplasm part; organelle lumen; nuclear …	transcription factor binding transcription factor activity; RNA polymerase II transcription cofactor activity; RNA polymerase II transcription factor binding transcription factor activity; transcription cofactor activity; protein binding transcription factor activity;
Q2TY87	DNA topoisomerase 2	1.539	Up	0.00029957	AO090103000347	162.37	111.25	17.3	26	33	26	nuclear	cellular component organization; cellular aromatic compound metabolic process; DNA metabolic process; organic cyclic compound metabolic process; nitrogen compound metabolic process; primary metabolic process; cellular metabolic process; DNA topological change; organic substance metabolic process; metabolic process; chromosome organization; nucleic acid metabolic process; heterocycle metabolic pro…		DNA binding; ATP binding; nucleoside phosphate binding; nucleoside binding; ion binding; hydrolase activity, acting on acid anhydrides; hydrolase activity; nucleotide binding; nucleoside-triphosphatase activity; ATPase activity; heterocyclic compound binding; organic cyclic compound binding; ribonucleoside binding; carbohydrate derivative binding; pyrophosphatase activity; isomerase activity; DNA…	K03164			IPR002205; IPR013758; IPR031660; IPR013757; IPR013506; IPR003594; IPR013759; IPR006171; IPR020568; IPR024946; IPR014721; IPR013760;	DNA topoisomerase, type IIA, subunit A/C-terminal; DNA topoisomerase, type IIA, subunit A/ C-terminal, alpha-beta; C-terminal associated domain of TOPRIM; Type IIA DNA topoisomerase subunit A, alpha-helical domain; DNA topoisomerase, type IIA, subunit B, domain 2; Histidine kinase-like ATPase, C-terminal domain; DNA topoisomerase, type IIA, central domain; Toprim domain; Ribosomal protein S5 doma…	[B]	KOG0355	DNA topoisomerase type II
Q2TY90	threonine dehydrogenase [Aspergillus oryzae 3.042]	0.273	Down	0.000407493	AO090103000343	37.753	33.305	17.3	5	9	5	cytosol	single-organism process; metabolic process; oxidation-reduction process; single-organism metabolic process;		transition metal ion binding; catalytic activity; binding; ion binding; metal ion binding; cation binding; zinc ion binding; oxidoreductase activity;	K18369	adh2; alcohol dehydrogenase [EC:1.1.1.-]	aor00640 Propanoate metabolism - Aspergillus oryzae;	IPR011032; IPR020843; IPR016040; IPR013154; IPR013149;	GroES-like; Polyketide synthase, enoylreductase domain; NAD(P)-binding domain; Alcohol dehydrogenase, N-terminal; Alcohol dehydrogenase, C-terminal;	[Q]	KOG0024	Sorbitol dehydrogenase
Q2TY93		0.238	Down	1.12599e-12	AO090103000340	63.641	73.685	20.7	9	18	9	mitochondria
Q2TYA0	putative exosome subunit [Aspergillus oryzae 3.042]	0.463	Down	0.02922	AO090103000333	37.304	14.808	15.5	5	5	5	mitochondria	cellular component biogenesis; cellular component organization; cellular macromolecular complex assembly; ribonucleoprotein complex biogenesis; ribonucleoprotein complex assembly; ribosome biogenesis; mature ribosome assembly; ribosome assembly; macromolecular complex subunit organization; ribonucleoprotein complex subunit organization; cellular component assembly; organelle assembly; macromolecu…			K14574	SDO1; ribosome maturation protein SDO1	aor03008 Ribosome biogenesis in eukaryotes - Aspergillus oryzae;	IPR018978; IPR019783;	Ribosome maturation protein SBDS, C-terminal; Ribosome maturation protein SBDS, N-terminal;	[J]	KOG2917	Predicted exosome subunit
Q2TYA2	ribosomal protein [Aspergillus oryzae 3.042]	0.297	Down	1e-32	AO090103000331	17.943	31.3	45.2	9	27	9	nuclear	cellular protein metabolic process; biosynthetic process; primary metabolic process; cellular metabolic process; organic substance biosynthetic process; cellular biosynthetic process; organic substance metabolic process; metabolic process; cellular macromolecule biosynthetic process; cellular macromolecule metabolic process; gene expression; macromolecule metabolic process; protein metabolic proc…	ribosome; organelle; intracellular organelle; intracellular non-membrane-bounded organelle; cell part; intracellular; cytoplasm; macromolecular complex; intracellular part; cell; ribonucleoprotein complex; cytoplasmic part; non-membrane-bounded organelle;	organic cyclic compound binding; heterocyclic compound binding; RNA binding; binding; nucleic acid binding; structural molecule activity; structural constituent of ribosome;	K02964	RP-S18e; small subunit ribosomal protein S18e	aor03010 Ribosome - Aspergillus oryzae;	IPR010979; IPR027437;	Ribosomal protein S13-like, H2TH; 30s ribosomal protein S13, C-terminal;	[J]	KOG3311	Ribosomal protein S18
Q2TYA7	Beta-xylanase	2.502	Up	0.0082058	AO090103000326	38.179	9.7431	8.9	2	2	2	extracellular	metabolic process; carbohydrate metabolic process; primary metabolic process; organic substance metabolic process;		hydrolase activity, hydrolyzing O-glycosyl compounds; hydrolase activity; catalytic activity; hydrolase activity, acting on glycosyl bonds;	K01181			IPR001000; IPR017853; IPR013781;	Glycoside hydrolase family 10 domain; Glycoside hydrolase superfamily; Glycoside hydrolase, catalytic domain;
Q2TYB1	Pro-apoptotic serine protease nma111	1.581	Up	4.72822e-12	nma111	113.31	125.91	23.2	20	27	20	cytosol	metabolic process; death; cell death; apoptotic process; single-organism cellular process; single-organism process; proteolysis; protein metabolic process; macromolecule metabolic process; programmed cell death; primary metabolic process; cellular process; organic substance metabolic process;	organelle; intracellular membrane-bounded organelle; intracellular organelle; nucleus; cell part; intracellular; intracellular part; membrane-bounded organelle; cell;	serine-type endopeptidase activity; endopeptidase activity; peptidase activity; catalytic activity; serine hydrolase activity; binding; serine-type peptidase activity; peptidase activity, acting on L-amino acid peptides; protein binding; hydrolase activity;				IPR009003; IPR025926; IPR001478;	Peptidase S1, PA clan; PDZ-like domain; PDZ domain;	[R]	KOG1421	Predicted signaling-associated protein (contains a PDZ domain)
Q2TYC6		4.21	Up	2.37981e-08	AO090103000302	58.997	33.128	18.1	8	11	8	cytosol
Q2TYK2	dehydrogenase with different specificitie [Aspergillus oryzae 3.042]	0.627	Down	0.00788999	AO090103000212	33.671	20.075	19.2	4	6	4	cytosol			catalytic activity; oxidoreductase activity;				IPR016040;	NAD(P)-binding domain;	[Q]	KOG1208	Dehydrogenases with different specificities (related to short-chain alcohol dehydrogenases)
Q2TYK7	reductase with broad range of substrate specificity [Aspergillus oryzae 3.042]	0.5	Down	1.95069e-07	AO090103000206	31.626	113.91	36.5	7	13	7	cytosol			catalytic activity; oxidoreductase activity;	K17742	SOU1; sorbose reductase [EC:1.1.1.289]	aor00051 Fructose and mannose metabolism - Aspergillus oryzae;	IPR016040;	NAD(P)-binding domain;	[R]	KOG0725	Reductases with broad range of substrate specificities
Q2TYR8	Peptidyl-prolyl cis-trans isomerase	1.867	Up	2.47491e-12	AO090103000136	12.56	46.584	58.3	7	34	7	cytosol	protein folding; metabolic process; cellular protein metabolic process; cellular macromolecule metabolic process; macromolecule metabolic process; protein metabolic process; primary metabolic process; cellular process; cellular metabolic process; organic substance metabolic process;		peptidyl-prolyl cis-trans isomerase activity; isomerase activity; catalytic activity; cis-trans isomerase activity;	K09568			IPR001179;	FKBP-type peptidyl-prolyl cis-trans isomerase domain;	[O]	KOG0544	FKBP-type peptidyl-prolyl cis-trans isomerase
Q2TYU4		4.827	Up	7.43694e-10	AO090103000108	25.3	53.083	36.7	8	15	8	extracellular
Q2TYX2	phospholipase C [Aspergillus oryzae 3.042]	1.847	Up	0.00316588	AO090103000073	54.44	30.889	18.5	8	9	8	nuclear	metabolic process;		hydrolase activity; catalytic activity; hydrolase activity, acting on ester bonds;	K01114	plcC; phospholipase C [EC:3.1.4.3]	aor01110 Biosynthesis of secondary metabolites - Aspergillus oryzae; aor00565 Ether lipid metabolism - Aspergillus oryzae; aor00562 Inositol phosphate metabolism - Aspergillus oryzae; aor00564 Glycerophospholipid metabolism - Aspergillus oryzae; aor01100 Metabolic pathways - Aspergillus oryzae;	IPR007312; IPR017850;	Phosphoesterase; Alkaline-phosphatase-like, core domain;
Q2TYY9	cystathionine beta-lyase [Aspergillus oryzae 3.042]	4.08	Up	7.03992e-12	AO090103000051	42.898	59.294	26.7	9	20	9	cytosol			organic cyclic compound binding; heterocyclic compound binding; catalytic activity; binding; ion binding; lyase activity; anion binding; cofactor binding; pyridoxal phosphate binding;	K01758	CTH; cystathionine gamma-lyase [EC:4.4.1.1]	aor00450 Selenocompound metabolism - Aspergillus oryzae; aor00260 Glycine, serine and threonine metabolism - Aspergillus oryzae; aor01130 Biosynthesis of antibiotics - Aspergillus oryzae; aor00270 Cysteine and methionine metabolism - Aspergillus oryzae; aor01230 Biosynthesis of amino acids - Aspergillus oryzae; aor01100 Metabolic pathways - Aspergillus oryzae;	IPR015424; IPR015421; IPR015422;	Pyridoxal phosphate-dependent transferase; Pyridoxal phosphate-dependent transferase, major region, subdomain 1; Pyridoxal phosphate-dependent transferase, major region, subdomain 2;	[E]	KOG0053	Cystathionine beta-lyases/cystathionine gamma-synthases
Q2TZ06	Protein sip5	0.564	Down	0.0392778	sip5	88.349	6.3573	4.6	4	4	4	nuclear		intracellular part; cell; cell part; intracellular; cytoplasm;							[R]	KOG2789	Putative Zn-finger protein
Q2TZ30		1.589	Up	0.00163344	AO090103000005	23.447	77.894	50.5	9	17	9	mitochondria							IPR012336;	Thioredoxin-like fold;
Q2TZ90	"Ca2+-binding actin-bundling protein (fimbrin/plastin), EF-Hand protein superfamily [Aspergillus oryzae 3.042]"	0.447	Down	3.24896e-12	AO090011000951	72.175	323.31	61.9	38	92	38	nuclear			cation binding; metal ion binding; protein binding; calcium ion binding; binding; ion binding;	K17275			IPR011992; IPR001715;	EF-hand domain pair; Calponin homology domain;	[Z]	KOG0046	Ca2+-binding actin-bundling protein (fimbrin/plastin), EF-Hand protein superfamily
Q2TZ98		0.427	Down	0.00017535	AO090011000941	32.925	10.878	13.5	4	6	4	nuclear							IPR011333;	SKP1/BTB/POZ domain;
Q2TZA6	SRP receptor beta subunit [Aspergillus oryzae 3.042]	0.355	Down	3.43626e-10	AO090011000933	34.128	30.893	28.4	10	12	10	extracellular				K12272	SRPRB; signal recognition particle receptor subunit beta	aor03060 Protein export - Aspergillus oryzae;	IPR027417;	P-loop containing nucleoside triphosphate hydrolase;	[U]	KOG0090	Signal recognition particle receptor, beta subunit (small G protein superfamily)
Q2TZB2	L-ornithine N(5)-monooxygenase	0.634	Down	0.0025263	dffA	56.94	56.829	28.9	12	14	12	plasma membrane	cofactor biosynthetic process; peptide metabolic process; single-organism biosynthetic process; peptide biosynthetic process; oxidation-reduction process; single-organism cellular process; nitrogen compound metabolic process; single-organism process; biosynthetic process; cellular amide metabolic process; organonitrogen compound biosynthetic process; secondary metabolite biosynthetic process; cel…		oxidoreductase activity, acting on paired donors, with incorporation or reduction of molecular oxygen, NAD(P)H as one donor, and incorporation of one atom of oxygen; oxidoreductase activity, acting on paired donors, with incorporation or reduction of molecular oxygen; N,N-dimethylaniline monooxygenase activity; catalytic activity; monooxygenase activity; oxidoreductase activity;	K10531			IPR023753;	FAD/NAD(P)-binding domain;	[Q]	KOG1399	Flavin-containing monooxygenase
Q2TZC1	Serine hydroxymethyltransferase	2.13	Up	1e-32	AO090011000915	56.253	67.503	37	16	39	15	mitochondria	cellular aromatic compound metabolic process; single-organism process; glycine metabolic process; tetrahydrofolate interconversion; cellular metabolic process; organic substance metabolic process; metabolic process; cellular amino acid metabolic process; cellular modified amino acid metabolic process; one-carbon metabolic process; heterocycle metabolic process; cellular nitrogen compound metaboli…		organic cyclic compound binding; heterocyclic compound binding; methyltransferase activity; catalytic activity; binding; ion binding; glycine hydroxymethyltransferase activity; transferase activity, transferring one-carbon groups; anion binding; hydroxymethyl-, formyl- and related transferase activity; cofactor binding; transferase activity; pyridoxal phosphate binding;	K00600	glyA; glycine hydroxymethyltransferase [EC:2.1.2.1]	aor01200 Carbon metabolism - Aspergillus oryzae; aor00630 Glyoxylate and dicarboxylate metabolism - Aspergillus oryzae; aor00260 Glycine, serine and threonine metabolism - Aspergillus oryzae; aor01110 Biosynthesis of secondary metabolites - Aspergillus oryzae; aor00670 One carbon pool by folate - Aspergillus oryzae; aor00680 Methane metabolism - Aspergillus oryzae; aor00460 Cyanoamino acid metabo…	IPR015424; IPR015422; IPR015421;	Pyridoxal phosphate-dependent transferase; Pyridoxal phosphate-dependent transferase, major region, subdomain 2; Pyridoxal phosphate-dependent transferase, major region, subdomain 1;	[E]	KOG2467	Glycine/serine hydroxymethyltransferase
Q2TZD2	protein containing adaptin nitrogen terminal region [Aspergillus oryzae 3.042]	0.389	Down	1e-32	AO090011000902	292.19	244.52	27.3	61	94	61	cytosol			binding;				IPR011989; IPR022716; IPR016024;	Armadillo-like helical; Gcn1, N-terminal; Armadillo-type fold;	[J]	KOG1242	Protein containing adaptin N-terminal region
Q2TZE5	tubulin-specific chaperone Rbl2 [Aspergillus oryzae 3.042]	1.755	Up	7.36527e-05	AO090011000883	13.446	21.984	58.5	6	11	6	nuclear	cellular component biogenesis; cellular component organization; cellular macromolecular complex assembly; protein complex subunit organization; tubulin complex assembly; cellular protein metabolic process; primary metabolic process; cellular metabolic process; tubulin complex biogenesis; organic substance metabolic process; macromolecular complex subunit organization; protein folding; metabolic p…	intracellular organelle; microtubule; intracellular non-membrane-bounded organelle; cytoskeletal part; intracellular organelle part; macromolecular complex; intracellular part; cell; organelle part; non-membrane-bounded organelle; organelle; cytoskeleton; microtubule cytoskeleton; cell part; intracellular; protein complex;	tubulin binding; beta-tubulin binding; protein binding; cytoskeletal protein binding; binding;	K17292
Q2TZF1		0.4	Down	3.24896e-12	AO090011000875	83.51	107.61	35.7	22	31	22	nuclear			lipid binding; binding;				IPR017943;	Bactericidal permeability-increasing protein, alpha/beta domain;
Q2TZF2	molecular chaperone [Aspergillus oryzae 3.042]	1.544	Up	0.0498364	AO090011000874	47.238	67.97	26.9	9	9	9	endoplasmic reticulum	protein folding; metabolic process; cellular protein metabolic process; cellular macromolecule metabolic process; macromolecule metabolic process; protein metabolic process; primary metabolic process; cellular process; cellular metabolic process; organic substance metabolic process;		heat shock protein binding; binding; ion binding; cation binding; metal ion binding; protein binding; unfolded protein binding;	K14002	SCJ1; DnaJ-related protein SCJ1	aor04141 Protein processing in endoplasmic reticulum - Aspergillus oryzae;	IPR008971; IPR002939; IPR001623; IPR001305;	HSP40/DnaJ peptide-binding; Chaperone DnaJ, C-terminal; DnaJ domain; Heat shock protein DnaJ, cysteine-rich domain;	[O]	KOG0712	Molecular chaperone (DnaJ superfamily)
Q2TZG3	sterol O-acyltransferase/Diacylglycerol O-acyltransferase [Aspergillus oryzae 3.042]	0.545	Down	0.0128465	AO090011000863	75.917	6.6065	3.1	2	3	2	plasma membrane		intrinsic component of membrane; membrane; integral component of membrane; membrane part;	transferase activity, transferring acyl groups; catalytic activity; transferase activity; transferase activity, transferring acyl groups other than amino-acyl groups; O-acyltransferase activity;	K11155	DGAT1; diacylglycerol O-acyltransferase 1 [EC:2.3.1.20 2.3.1.75 2.3.1.76]	aor00561 Glycerolipid metabolism - Aspergillus oryzae; aor01100 Metabolic pathways - Aspergillus oryzae;	IPR023352;	Membrane associated eicosanoid/glutathione metabolism-like domain;	[I]	KOG0380	Sterol O-acyltransferase/Diacylglycerol O-acyltransferase
Q2TZH5	60S ribosomal protein L14/L17/L23 [Aspergillus oryzae 3.042]	0.376	Down	7.9e-05	AO090011000850	14.32	14.883	38.2	5	9	5	nuclear	cellular protein metabolic process; biosynthetic process; primary metabolic process; cellular metabolic process; organic substance biosynthetic process; cellular biosynthetic process; organic substance metabolic process; metabolic process; cellular macromolecule biosynthetic process; cellular macromolecule metabolic process; gene expression; macromolecule metabolic process; protein metabolic proc…	ribosome; intracellular organelle; intracellular non-membrane-bounded organelle; intracellular organelle part; cytoplasm; macromolecular complex; intracellular part; cell; organelle part; non-membrane-bounded organelle; organelle; large ribosomal subunit; intracellular; cell part; ribosomal subunit; ribonucleoprotein complex; cytoplasmic part;	structural constituent of ribosome; structural molecule activity;						[J]	KOG0901	60S ribosomal protein L14/L17/L23
Q2TZK3	amino acid transporter [Aspergillus oryzae 3.042]	1.873	Up	0.000312665	AO090011000820	62.508	13.744	10.8	7	12	7	plasma membrane	ion transmembrane transport; single-organism cellular process; single-organism process; organic substance transport; amino acid transmembrane transport; carboxylic acid transport; organic acid transport; anion transmembrane transport; establishment of localization; transport; anion transport; transmembrane transport; organic anion transport; single-organism localization; organic acid transmembran…	intrinsic component of membrane; membrane; integral component of membrane; membrane part;	organic acid transmembrane transporter activity; ion transmembrane transporter activity; substrate-specific transporter activity; organic anion transmembrane transporter activity; anion transmembrane transporter activity; carboxylic acid transmembrane transporter activity; substrate-specific transmembrane transporter activity; amino acid transmembrane transporter activity; transporter activity; t…	K16261			IPR004841;	Amino acid permease/ SLC12A domain;	[E]	KOG1286	Amino acid transporters
Q2TZL3	dihydrofolate reductase [Aspergillus oryzae 3.042]	1.6	Up	0.0021587	AO090011000807	26.915	15.713	23.8	6	7	6	mitochondria	nucleotide biosynthetic process; organic acid biosynthetic process; cellular aromatic compound metabolic process; nucleotide metabolic process; single-organism process; biosynthetic process; glycine metabolic process; organonitrogen compound biosynthetic process; cellular metabolic process; phosphate-containing compound metabolic process; organic substance metabolic process; metabolic process; ce…		organic cyclic compound binding; heterocyclic compound binding; oxidoreductase activity, acting on the CH-NH group of donors; oxidoreductase activity, acting on the CH-NH group of donors, NAD or NADP as acceptor; nucleoside phosphate binding; catalytic activity; dihydrofolate reductase activity; binding; NADP binding; nucleotide binding; cofactor binding; oxidoreductase activity; coenzyme binding…	K00287	folA; dihydrofolate reductase [EC:1.5.1.3]	aor00790 Folate biosynthesis - Aspergillus oryzae; aor00670 One carbon pool by folate - Aspergillus oryzae; aor01100 Metabolic pathways - Aspergillus oryzae;	IPR001796; IPR024072;	Dihydrofolate reductase domain; Dihydrofolate reductase-like domain;	[H]	KOG1324	Dihydrofolate reductase
Q2TZL8	isoamyl acetate-hydrolyzing esterase [Aspergillus oryzae 3.042]	1.601	Up	1.74e-05	AO090011000802	26.827	82.843	29.3	7	14	7	cytoskeleton			hydrolase activity; catalytic activity;				IPR013830;	SGNH hydrolase-type esterase domain;	[I]	KOG3035	Isoamyl acetate-hydrolyzing esterase
Q2TZM2	translation initiation factor 5 [Aspergillus oryzae 3.042]	2.802	Up	0.00165564	AO090011000798	46.84	27.291	11.1	4	5	4	nuclear	cellular protein metabolic process; biosynthetic process; primary metabolic process; organic substance biosynthetic process; cellular metabolic process; cellular biosynthetic process; organic substance metabolic process; metabolic process; cellular macromolecule biosynthetic process; translational initiation; cellular macromolecule metabolic process; gene expression; macromolecule metabolic proce…		organic cyclic compound binding; heterocyclic compound binding; RNA binding; translation factor activity, nucleic acid binding; binding; nucleic acid binding; translation initiation factor activity; protein binding;	K03262	EIF5; translation initiation factor 5	aor03013 RNA transport - Aspergillus oryzae;	IPR016189; IPR016190; IPR003307; IPR002735; IPR016024; IPR016021;	Translation initiation factor IF2/IF5, N-terminal; Translation initiation factor IF2/IF5, zinc-binding; W2 domain; Translation initiation factor IF2/IF5; Armadillo-type fold; MIF4G-like domain;	[J]	KOG2767	Translation initiation factor 5 (eIF-5)
Q2TZN1	"mRNA cleavage and polyadenylation factor I complex, subunit RNA15 [Aspergillus oryzae 3.042]"	0.593	Down	0.0305929	AO090011000789	30.401	64.375	13.5	3	4	3	nuclear	RNA processing; RNA 3'-end processing; cellular aromatic compound metabolic process; mRNA 3'-end processing; organic cyclic compound metabolic process; nitrogen compound metabolic process; primary metabolic process; cellular metabolic process; organic substance metabolic process; RNA metabolic process; mRNA processing; metabolic process; nucleic acid metabolic process; heterocycle metabolic proce…		organic cyclic compound binding; heterocyclic compound binding; nucleoside phosphate binding; binding; nucleic acid binding; nucleotide binding; small molecule binding;	K14407	CSTF2; cleavage stimulation factor subunit 2	aor03015 mRNA surveillance pathway - Aspergillus oryzae;	IPR000504; IPR012677; IPR025742; IPR026896;	RNA recognition motif domain; Nucleotide-binding alpha-beta plait domain; Cleavage stimulation factor subunit 2, hinge domain; Transcription termination and cleavage factor, C-terminal domain;	[A]	KOG0108	mRNA cleavage and polyadenylation factor I complex, subunit RNA15
Q2TZP1	putative RNA-binding protein [Aspergillus oryzae 3.042]	2.617	Up	3.06e-06	AO090011000778	121.98	17.655	4	3	5	3	nuclear							IPR021846; IPR008532;	Domain of unknown function DUF3441; Domain of unknown function DUF814;	[R]	KOG2030	Predicted RNA-binding protein
Q2TZP2	"vesicle coat complex COPI, zeta subunit [Aspergillus oryzae 3.042]"	0.449	Down	0.00138	AO090011000777	22.048	27.218	27.4	5	10	5	cytosol	establishment of protein localization; transport; organic substance transport; localization; macromolecule localization; protein localization; protein transport; establishment of localization;	membrane;		K20472			IPR022775; IPR011012;	AP complex, mu/sigma subunit; Longin-like domain;	[U]	KOG3343	Vesicle coat complex COPI, zeta subunit
Q2TZP5	60s ribosomal protein [Aspergillus oryzae 3.042]	0.517	Down	3.56e-09	AO090011000774	25.405	101.49	48	12	39	12	mitochondria	cellular protein metabolic process; biosynthetic process; primary metabolic process; cellular metabolic process; organic substance biosynthetic process; cellular biosynthetic process; organic substance metabolic process; metabolic process; cellular macromolecule biosynthetic process; cellular macromolecule metabolic process; gene expression; macromolecule metabolic process; protein metabolic proc…	ribosome; organelle; intracellular organelle; intracellular non-membrane-bounded organelle; cell part; intracellular; cytoplasm; macromolecular complex; intracellular part; cell; ribonucleoprotein complex; cytoplasmic part; non-membrane-bounded organelle;	structural constituent of ribosome; structural molecule activity;	K02866	RP-L10e; large subunit ribosomal protein L10e	aor03010 Ribosome - Aspergillus oryzae;	IPR016180;	Ribosomal protein L10e/L16;	[J]	KOG0857	60s ribosomal protein L10
Q2TZR7	putative flavoprotein involved in K+ transport [Aspergillus oryzae 3.042]	1.594	Up	0.0183446	AO090011000747	57.574	21.737	14.5	6	7	6	cytosol	single-organism process; metabolic process; oxidation-reduction process; single-organism metabolic process;		oxidoreductase activity, acting on paired donors, with incorporation or reduction of molecular oxygen, NAD(P)H as one donor, and incorporation of one atom of oxygen; nucleoside phosphate binding; flavin adenine dinucleotide binding; ion binding; oxidoreductase activity, acting on paired donors, with incorporation or reduction of molecular oxygen; nucleotide binding; N,N-dimethylaniline monooxygen…	K03379			IPR023753;	FAD/NAD(P)-binding domain;	[Q]	KOG1399	Flavin-containing monooxygenase
Q2TZU5	Protein YOP1	0.366	Down	3.96e-07	AO090011000717	34.312	139.6	43.2	10	22	10	plasma membrane									[V]	KOG1726	HVA22/DP1 gene product-related proteins
Q2TZW5	protein involved in biosynthesis of mitomycin antibiotics/polyketide fumonisin [Aspergillus oryzae 3.042]	1.709	Up	0.0396	AO090011000693	45.243	11.71	6.7	2	3	2	cytosol
Q2TZZ1		0.181	Down	1.63e-08	AO090011000661	24.808	25.837	27.7	5	9	5	nuclear	cellular protein metabolic process; biosynthetic process; primary metabolic process; cellular metabolic process; organic substance biosynthetic process; cellular biosynthetic process; organic substance metabolic process; metabolic process; cellular macromolecule biosynthetic process; cellular macromolecule metabolic process; gene expression; macromolecule metabolic process; protein metabolic proc…	ribosome; organelle; intracellular organelle; intracellular non-membrane-bounded organelle; cell part; intracellular; cytoplasm; macromolecular complex; intracellular part; cell; ribonucleoprotein complex; cytoplasmic part; non-membrane-bounded organelle;	structural constituent of ribosome; structural molecule activity;
Q2U000	dioxygenases related to 2-nitropropane dioxygenase [Aspergillus oryzae 3.042]	0.54	Down	1.04805e-13	AO090011000650	37.648	159.09	39.7	12	25	12	cytosol	single-organism process; metabolic process; oxidation-reduction process; single-organism metabolic process;		oxidoreductase activity, acting on single donors with incorporation of molecular oxygen; oxidoreductase activity, acting on single donors with incorporation of molecular oxygen, incorporation of one atom of oxygen (internal monooxygenases or internal mixed function oxidases); catalytic activity; dioxygenase activity; nitronate monooxygenase activity; monooxygenase activity; oxidoreductase activit…				IPR013785; IPR004136;	Aldolase-type TIM barrel; Nitronate monooxygenase;
Q2U005	acyl-CoA synthetase [Aspergillus oryzae 3.042]	0.635	Down	4.17718e-09	AO090011000642	76.31	96.758	32.1	21	39	21	cytosol	metabolic process;		catalytic activity;	K01897	ACSL; long-chain acyl-CoA synthetase [EC:6.2.1.3]	aor01212 Fatty acid metabolism - Aspergillus oryzae; aor00061 Fatty acid biosynthesis - Aspergillus oryzae; aor04146 Peroxisome - Aspergillus oryzae; aor00071 Fatty acid degradation - Aspergillus oryzae; aor01100 Metabolic pathways - Aspergillus oryzae;	IPR000873;	AMP-dependent synthetase/ligase;	[I]	KOG1180	Acyl-CoA synthetase
Q2U011	nuclear transport receptor RANBP7/RANBP8 [Aspergillus oryzae 3.042]	0.458	Down	3.07254e-10	AO090011000635	118.85	139.86	25.6	24	35	24	nuclear	establishment of protein localization; transport; intracellular transport; cellular macromolecule localization; establishment of localization in cell; intracellular protein transport; organic substance transport; protein localization; macromolecule localization; cellular protein localization; localization; protein transport; establishment of localization; cellular localization;	organelle; intracellular membrane-bounded organelle; intracellular organelle; nucleus; cell part; intracellular; intracellular part; membrane-bounded organelle; cell;	small GTPase binding; Ras GTPase binding; binding; protein binding; Ran GTPase binding; GTPase binding; enzyme binding;	K20223			IPR001494; IPR011989; IPR016024; IPR013713;	Importin-beta, N-terminal domain; Armadillo-like helical; Armadillo-type fold; Exportin/Importin, Cse1-like;	[YU]	KOG1991	Nuclear transport receptor RANBP7/RANBP8 (importin beta superfamily)
Q2U013		0.261	Down	1e-32	AO090011000633	29.399	80.174	43.3	11	32	11	mitochondria			organic cyclic compound binding; heterocyclic compound binding; nucleoside phosphate binding; binding; nucleic acid binding; nucleotide binding; small molecule binding;				IPR000504; IPR012677;	RNA recognition motif domain; Nucleotide-binding alpha-beta plait domain;
Q2U020	DNA helicase	0.385	Down	1.38e-06	AO090011000622	90.308	45.966	17.5	11	16	11	nuclear	DNA replication; cellular aromatic compound metabolic process; DNA metabolic process; organic cyclic compound metabolic process; nitrogen compound metabolic process; biosynthetic process; primary metabolic process; organic substance biosynthetic process; cellular metabolic process; cellular biosynthetic process; organic substance metabolic process; metabolic process; DNA replication initiation; c…	organelle; intracellular membrane-bounded organelle; intracellular organelle; nucleus; cell part; intracellular; macromolecular complex; intracellular part; MCM complex; protein complex; membrane-bounded organelle; cell;	DNA binding; ATP binding; nucleoside phosphate binding; helicase activity; nucleoside binding; ion binding; hydrolase activity, acting on acid anhydrides; hydrolase activity; nucleotide binding; nucleoside-triphosphatase activity; heterocyclic compound binding; organic cyclic compound binding; ribonucleoside binding; carbohydrate derivative binding; pyrophosphatase activity; catalytic activity; r…	K02210	MCM7; DNA replication licensing factor MCM7 [EC:3.6.4.12]	aor04113 Meiosis - yeast - Aspergillus oryzae; aor03030 DNA replication - Aspergillus oryzae; aor04111 Cell cycle - yeast - Aspergillus oryzae;	IPR012340; IPR003593; IPR001208; IPR033762; IPR027417; IPR027925;	Nucleic acid-binding, OB-fold; AAA+ ATPase domain; MCM domain; MCM OB domain; P-loop containing nucleoside triphosphate hydrolase; MCM N-terminal domain;	[L]	KOG0482	DNA replication licensing factor, MCM7 component
Q2U022	acyl-CoA synthetase [Aspergillus oryzae 3.042]	2.164	Up	7.53e-06	AO090011000620	62.197	48.929	28.5	15	17	15	cytosol	metabolic process;		catalytic activity;				IPR025110; IPR000873;	AMP-binding enzyme C-terminal domain; AMP-dependent synthetase/ligase;	[I]	KOG1176	Acyl-CoA synthetase
Q2U027	aldehyde reductase [Aspergillus oryzae 3.042]	1.75	Up	0.00183781	AO090011000613	36.637	54.054	32	9	21	9	cytosol	single-organism carbohydrate catabolic process; organic hydroxy compound metabolic process; oxidation-reduction process; alcohol metabolic process; inositol metabolic process; cellular carbohydrate catabolic process; single-organism catabolic process; small molecule metabolic process; single-organism cellular process; single-organism process; small molecule catabolic process; alcohol catabolic pr…	intracellular part; cell; cell part; intracellular; cytoplasm;	oxidoreductase activity, acting on single donors with incorporation of molecular oxygen; iron ion binding; transition metal ion binding; catalytic activity; binding; inositol oxygenase activity; ion binding; metal ion binding; cation binding; oxidoreductase activity;	K00469	MIOX; inositol oxygenase [EC:1.13.99.1]	aor00562 Inositol phosphate metabolism - Aspergillus oryzae; aor00053 Ascorbate and aldarate metabolism - Aspergillus oryzae;
Q2U038	Kynureninase 1	1.673	Up	0.015097	bna5-1	54.915	30.46	19.7	7	10	7	cytosol	cofactor biosynthetic process; alpha-amino acid catabolic process; pyridine nucleotide metabolic process; organic acid biosynthetic process; ketone catabolic process; nucleotide metabolic process; single-organism process; biosynthetic process; pyridine nucleotide biosynthetic process; pyridine-containing compound metabolic process; cellular metabolic process; phosphate-containing compound metabol…	intracellular part; cell; cell part; intracellular; cytoplasm;	organic cyclic compound binding; heterocyclic compound binding; kynureninase activity; catalytic activity; hydrolase activity, acting on acid carbon-carbon bonds; binding; ion binding; anion binding; hydrolase activity, acting on acid carbon-carbon bonds, in ketonic substances; hydrolase activity; cofactor binding; pyridoxal phosphate binding;	K01556	KYNU; kynureninase [EC:3.7.1.3]	aor00380 Tryptophan metabolism - Aspergillus oryzae; aor01100 Metabolic pathways - Aspergillus oryzae;	IPR015424; IPR000192; IPR015422; IPR015421;	Pyridoxal phosphate-dependent transferase; Aminotransferase class V domain; Pyridoxal phosphate-dependent transferase, major region, subdomain 2; Pyridoxal phosphate-dependent transferase, major region, subdomain 1;
Q2U044	40S ribosomal protein [Aspergillus oryzae 3.042]	0.364	Down	3.30047e-12	AO090011000596	15.817	179.87	47.3	8	34	8	mitochondria	cellular protein metabolic process; biosynthetic process; primary metabolic process; cellular metabolic process; organic substance biosynthetic process; cellular biosynthetic process; organic substance metabolic process; metabolic process; cellular macromolecule biosynthetic process; cellular macromolecule metabolic process; gene expression; macromolecule metabolic process; protein metabolic proc…	ribosome; organelle; intracellular organelle; intracellular non-membrane-bounded organelle; cell part; intracellular; cytoplasm; macromolecular complex; intracellular part; cell; ribonucleoprotein complex; cytoplasmic part; non-membrane-bounded organelle;	structural constituent of ribosome; structural molecule activity;	K02955	RP-S14e; small subunit ribosomal protein S14e	aor03010 Ribosome - Aspergillus oryzae;			[J]	KOG0407	40S ribosomal protein S14
Q2U048	40S ribosomal protein [Aspergillus oryzae 3.042]	0.446	Down	1e-32	AO090011000590	15.923	38.142	60.8	11	35	11	mitochondria	cellular protein metabolic process; biosynthetic process; primary metabolic process; cellular metabolic process; organic substance biosynthetic process; cellular biosynthetic process; organic substance metabolic process; metabolic process; cellular macromolecule biosynthetic process; cellular macromolecule metabolic process; gene expression; macromolecule metabolic process; protein metabolic proc…	ribosome; organelle; intracellular organelle; intracellular non-membrane-bounded organelle; cell part; intracellular; cytoplasm; macromolecular complex; intracellular part; cell; ribonucleoprotein complex; cytoplasmic part; non-membrane-bounded organelle;	structural constituent of ribosome; structural molecule activity;	K02960	RP-S16e; small subunit ribosomal protein S16e	aor03010 Ribosome - Aspergillus oryzae;	IPR020568; IPR014721;	Ribosomal protein S5 domain 2-type fold; Ribosomal protein S5 domain 2-type fold, subgroup;	[J]	KOG1753	40S ribosomal protein S16
Q2U050	Uricase	0.613	Down	3.24896e-12	AO090011000588	34.24	302.61	63.2	18	59	18	cytosol	cellular aromatic compound metabolic process; single-organism process; purine-containing compound catabolic process; cellular metabolic process; urate metabolic process; organic substance metabolic process; cellular nitrogen compound catabolic process; metabolic process; heterocycle metabolic process; nucleobase-containing compound metabolic process; cellular catabolic process; organic cyclic com…	organelle; intracellular membrane-bounded organelle; intracellular organelle; cell part; intracellular; peroxisome; microbody; cytoplasm; intracellular part; cell; membrane-bounded organelle; cytoplasmic part;	oxidoreductase activity, acting on other nitrogenous compounds as donors, oxygen as acceptor; catalytic activity; urate oxidase activity; oxidoreductase activity; oxidoreductase activity, acting on other nitrogenous compounds as donors;	K00365	uaZ; urate oxidase [EC:1.7.3.3]	aor00232 Caffeine metabolism - Aspergillus oryzae; aor00230 Purine metabolism - Aspergillus oryzae; aor01100 Metabolic pathways - Aspergillus oryzae;			[Q]	KOG1599	Uricase (urate oxidase)
Q2U059	Mannitol-1-phosphate 5-dehydrogenase	1.86	Up	4.44089e-16	mpdA	43.479	163.78	60.4	21	56	21	cytosol	mannitol metabolic process; alditol metabolic process; organic hydroxy compound metabolic process; oxidation-reduction process; alcohol metabolic process; small molecule metabolic process; single-organism cellular process; single-organism process; hexitol metabolic process; primary metabolic process; carbohydrate metabolic process; polyol metabolic process; cellular metabolic process; organic sub…		oxidoreductase activity, acting on CH-OH group of donors; oxidoreductase activity, acting on the CH-OH group of donors, NAD or NADP as acceptor; catalytic activity; binding; mannitol-1-phosphate 5-dehydrogenase activity; cofactor binding; coenzyme binding; oxidoreductase activity;	K00009	mtlD; mannitol-1-phosphate 5-dehydrogenase [EC:1.1.1.17]	aor00051 Fructose and mannose metabolism - Aspergillus oryzae;	IPR013118; IPR008927; IPR013328; IPR013131; IPR016040;	Mannitol dehydrogenase, C-terminal; 6-phosphogluconate dehydrogenase C-terminal domain-like; 6-phosphogluconate dehydrogenase, domain 2; Mannitol dehydrogenase, N-terminal; NAD(P)-binding domain;
Q2U061	ribosomal protein S6 kinase [Aspergillus oryzae 3.042]	0.576	Down	1.86241e-08	AO090011000574	76.257	109.08	28.2	16	29	16	mitochondria	phosphorylation; cellular protein metabolic process; primary metabolic process; cellular metabolic process; phosphate-containing compound metabolic process; organic substance metabolic process; metabolic process; protein phosphorylation; phosphorus metabolic process; cellular macromolecule metabolic process; cellular protein modification process; protein metabolic process; macromolecule metabolic…		ATP binding; nucleoside phosphate binding; phosphotransferase activity, alcohol group as acceptor; nucleoside binding; ion binding; nucleotide binding; protein kinase activity; organic cyclic compound binding; heterocyclic compound binding; ribonucleoside binding; carbohydrate derivative binding; kinase activity; ribonucleotide binding; catalytic activity; binding; purine ribonucleoside binding; …	K13303			IPR000719; IPR017892; IPR011009; IPR000961;	Protein kinase domain; Protein kinase, C-terminal; Protein kinase-like domain; AGC-kinase, C-terminal;	[RT]	KOG0598	Ribosomal protein S6 kinase and related proteins
Q2U073	DNA polymerase	1.915	Up	0.00863121	AO090011000559	164.76	25.436	6.7	9	9	9	nuclear	DNA replication; cellular aromatic compound metabolic process; DNA metabolic process; organic cyclic compound metabolic process; nitrogen compound metabolic process; biosynthetic process; primary metabolic process; organic substance biosynthetic process; cellular metabolic process; cellular biosynthetic process; organic substance metabolic process; metabolic process; cellular macromolecule biosyn…		DNA binding; nucleoside phosphate binding; nucleoside binding; 3'-5' exonuclease activity; hydrolase activity; nucleotide binding; heterocyclic compound binding; organic cyclic compound binding; carbohydrate derivative binding; nucleotidyltransferase activity; catalytic activity; binding; nuclease activity; hydrolase activity, acting on ester bonds; nucleic acid binding; DNA polymerase activity; …	K02320	POLA1; DNA polymerase alpha subunit A [EC:2.7.7.7]	aor03030 DNA replication - Aspergillus oryzae; aor00230 Purine metabolism - Aspergillus oryzae; aor00240 Pyrimidine metabolism - Aspergillus oryzae; aor01100 Metabolic pathways - Aspergillus oryzae;	IPR023211; IPR006133; IPR015088; IPR012337; IPR024647; IPR006134;	DNA polymerase, palm domain; DNA-directed DNA polymerase, family B, exonuclease domain; Zinc finger, DNA-directed DNA polymerase, family B, alpha; Ribonuclease H-like domain; DNA polymerase alpha catalytic subunit, N-terminal domain; DNA-directed DNA polymerase, family B, multifunctional domain;	[L]	KOG0970	DNA polymerase alpha, catalytic subunit
Q2U081	Protein YIP	0.205	Down	0.00259	AO090011000550	32.205	28.347	25.9	6	9	6	plasma membrane		membrane;					IPR006977;	Yip1 domain;	[S]	KOG2946	Uncharacterized conserved protein
Q2U0A7	"UDP-glucose,glycoprotein glucosyltransferase [Aspergillus oryzae 3.042]"	1.621	Up	1.2348e-08	AO090011000515	165.88	188.06	25.7	30	42	30	extracellular	protein glycosylation; macromolecule glycosylation; glycoprotein biosynthetic process; single-organism cellular process; cellular protein metabolic process; glycoprotein metabolic process; single-organism process; biosynthetic process; primary metabolic process; carbohydrate metabolic process; cellular metabolic process; organic substance biosynthetic process; cellular biosynthetic process; organ…		transferase activity, transferring hexosyl groups; catalytic activity; UDP-glucose:glycoprotein glucosyltransferase activity; UDP-glucosyltransferase activity; UDP-glycosyltransferase activity; glucosyltransferase activity; transferase activity, transferring glycosyl groups; transferase activity;	K11718	HUGT; UDP-glucose:glycoprotein glucosyltransferase [EC:2.4.1.-]	aor04141 Protein processing in endoplasmic reticulum - Aspergillus oryzae;	IPR029044;	Nucleotide-diphospho-sugar transferases;	[G]	KOG1879	UDP-glucose:glycoprotein glucosyltransferase
Q2U0B7	dihydroorotase [Aspergillus oryzae 3.042]	4.077	Up	0.0284145	AO090011000504	54.299	11.601	8.5	4	4	4	mitochondria	allantoin catabolic process; organic cyclic compound metabolic process; nitrogen compound metabolic process; cellular amide metabolic process; allantoin metabolic process; cellular metabolic process; cellular amide catabolic process; organic substance metabolic process; organic substance catabolic process; cellular nitrogen compound catabolic process; metabolic process; organonitrogen compound ca…		transition metal ion binding; catalytic activity; binding; cobalt ion binding; ion binding; allantoinase activity; hydrolase activity, acting on carbon-nitrogen (but not peptide) bonds, in cyclic amides; metal ion binding; cation binding; hydrolase activity; zinc ion binding; hydrolase activity, acting on carbon-nitrogen (but not peptide) bonds;	K01466	allB; allantoinase [EC:3.5.2.5]	aor00230 Purine metabolism - Aspergillus oryzae; aor01100 Metabolic pathways - Aspergillus oryzae;	IPR032466; IPR006680; IPR011059;	Metal-dependent hydrolase; Amidohydrolase-related; Metal-dependent hydrolase, composite domain;	[F]	KOG2584	Dihydroorotase and related enzymes
Q2U0E3	putative acetamidase/formamidase [Aspergillus oryzae 3.042]	3.393	Up	1e-32	AO090011000472	45.012	91.753	44	15	35	15	cytosol		extracellular region;	hydrolase activity; hydrolase activity, acting on carbon-nitrogen (but not peptide) bonds, in linear amides; catalytic activity; hydrolase activity, acting on carbon-nitrogen (but not peptide) bonds;	K01455	E3.5.1.49; formamidase [EC:3.5.1.49]	aor01200 Carbon metabolism - Aspergillus oryzae; aor00910 Nitrogen metabolism - Aspergillus oryzae; aor00460 Cyanoamino acid metabolism - Aspergillus oryzae; aor00630 Glyoxylate and dicarboxylate metabolism - Aspergillus oryzae;
Q2U0E4		0.503	Down	5.98407e-06	AO090011000471	43.43	28.771	17.8	5	8	5	plasma membrane
Q2U0F8	"5-demethoxyubiquinone hydroxylase, mitochondrial"	0.526	Down	0.000999	COQ7	29.204	20.595	23.3	4	5	4	mitochondria	cofactor biosynthetic process; ketone biosynthetic process; quinone biosynthetic process; ubiquinone biosynthetic process; oxidoreduction coenzyme metabolic process; single-organism biosynthetic process; oxidation-reduction process; quinone metabolic process; small molecule metabolic process; single-organism cellular process; single-organism process; coenzyme metabolic process; biosynthetic proce…			K06134	COQ7; ubiquinone biosynthesis monooxygenase Coq7 [EC:1.14.13.-]	aor00130 Ubiquinone and other terpenoid-quinone biosynthesis - Aspergillus oryzae; aor01110 Biosynthesis of secondary metabolites - Aspergillus oryzae; aor01100 Metabolic pathways - Aspergillus oryzae;	IPR012347; IPR009078;	Ferritin-related; Ferritin-like superfamily;	[R]	KOG4061	DMQ mono-oxygenase/Ubiquinone biosynthesis protein COQ7/CLK-1/CAT5
Q2U0I7	conserved WD40 repeat-containing protein [Aspergillus oryzae 3.042]	1.597	Up	0.000143	AO090011000424	59.874	34.036	19.4	8	11	8	mitochondria	rRNA metabolic process; ncRNA processing; cellular component biogenesis; ribonucleoprotein complex biogenesis; cellular aromatic compound metabolic process; ribosome biogenesis; organic cyclic compound metabolic process; nitrogen compound metabolic process; primary metabolic process; cellular metabolic process; organic substance metabolic process; RNA metabolic process; metabolic process; nucleic…	intracellular organelle; intracellular non-membrane-bounded organelle; intracellular organelle part; nuclear lumen; intracellular part; nucleolus; cell; organelle part; non-membrane-bounded organelle; organelle; intracellular membrane-bounded organelle; membrane-enclosed lumen; nucleus; intracellular organelle lumen; cell part; intracellular; membrane-bounded organelle; organelle lumen; nuclear p…	protein binding; binding;	K14549	UTP15; U3 small nucleolar RNA-associated protein 15	aor03008 Ribosome biogenesis in eukaryotes - Aspergillus oryzae;	IPR018983; IPR017986; IPR015943;	U3 small nucleolar RNA-associated protein 15, C-terminal; WD40-repeat-containing domain; WD40/YVTN repeat-like-containing domain;	[S]	KOG0310	Conserved WD40 repeat-containing protein
Q2U0J2	quinone reductase [Aspergillus oryzae 3.042]	7.187	Up	0.000186	AO090011000419	36.703	14.494	8.7	3	5	3	cytosol	single-organism process; metabolic process; oxidation-reduction process; single-organism metabolic process;		transition metal ion binding; catalytic activity; binding; ion binding; metal ion binding; cation binding; zinc ion binding; oxidoreductase activity;				IPR011032; IPR020843; IPR016040; IPR013154; IPR013149;	GroES-like; Polyketide synthase, enoylreductase domain; NAD(P)-binding domain; Alcohol dehydrogenase, N-terminal; Alcohol dehydrogenase, C-terminal;	[CR]	KOG1198	Zinc-binding oxidoreductase
Q2U0J7	Glyceraldehyde-3-phosphate dehydrogenase	0.589	Down	1e-32	AO090011000414	36.08	305.99	72.2	20	103	19	cytosol	glucose metabolic process; single-organism carbohydrate metabolic process; metabolic process; oxidation-reduction process; single-organism metabolic process; monosaccharide metabolic process; single-organism process; primary metabolic process; carbohydrate metabolic process; organic substance metabolic process; hexose metabolic process;		nucleoside phosphate binding; oxidoreductase activity, acting on the aldehyde or oxo group of donors; nucleotide binding; cofactor binding; oxidoreductase activity; oxidoreductase activity, acting on the aldehyde or oxo group of donors, NAD or NADP as acceptor; heterocyclic compound binding; organic cyclic compound binding; catalytic activity; NAD binding; binding; NADP binding; coenzyme binding;…	K00134	GAPDH; glyceraldehyde 3-phosphate dehydrogenase [EC:1.2.1.12]	aor01200 Carbon metabolism - Aspergillus oryzae; aor00010 Glycolysis / Gluconeogenesis - Aspergillus oryzae; aor01110 Biosynthesis of secondary metabolites - Aspergillus oryzae; aor01130 Biosynthesis of antibiotics - Aspergillus oryzae; aor01230 Biosynthesis of amino acids - Aspergillus oryzae; aor01100 Metabolic pathways - Aspergillus oryzae;	IPR020829; IPR016040; IPR020828;	Glyceraldehyde 3-phosphate dehydrogenase, catalytic domain; NAD(P)-binding domain; Glyceraldehyde 3-phosphate dehydrogenase, NAD(P) binding domain;	[G]	KOG0657	Glyceraldehyde 3-phosphate dehydrogenase
Q2U0N3	glyoxylate/hydroxypyruvate reductase [Aspergillus oryzae 3.042]	2.56	Up	3.34532e-12	AO090011000368	35.853	146.69	55	15	37	15	cytosol	single-organism process; metabolic process; oxidation-reduction process; single-organism metabolic process;		organic cyclic compound binding; heterocyclic compound binding; oxidoreductase activity, acting on CH-OH group of donors; oxidoreductase activity, acting on the CH-OH group of donors, NAD or NADP as acceptor; nucleoside phosphate binding; NAD binding; catalytic activity; binding; nucleotide binding; cofactor binding; small molecule binding; coenzyme binding; oxidoreductase activity;				IPR006139; IPR006140; IPR016040;	D-isomer specific 2-hydroxyacid dehydrogenase, catalytic domain; D-isomer specific 2-hydroxyacid dehydrogenase, NAD-binding domain; NAD(P)-binding domain;	[C]	KOG0069	Glyoxylate/hydroxypyruvate reductase (D-isomer-specific 2-hydroxy acid dehydrogenase superfamily)
Q2U0N4		0.2	Down	3.24896e-12	AO090011000367	20.365	86.645	51.9	10	43	10	mitochondria	cellular protein metabolic process; biosynthetic process; primary metabolic process; cellular metabolic process; organic substance biosynthetic process; cellular biosynthetic process; organic substance metabolic process; metabolic process; cellular macromolecule biosynthetic process; cellular macromolecule metabolic process; gene expression; macromolecule metabolic process; protein metabolic proc…	ribosome; intracellular organelle; intracellular non-membrane-bounded organelle; intracellular organelle part; cytoplasm; macromolecular complex; intracellular part; cell; organelle part; non-membrane-bounded organelle; organelle; large ribosomal subunit; intracellular; cell part; ribosomal subunit; ribonucleoprotein complex; cytoplasmic part;	structural constituent of ribosome; structural molecule activity;	K02880	RP-L17e; large subunit ribosomal protein L17e	aor03010 Ribosome - Aspergillus oryzae;			[J]	KOG3353	60S ribosomal protein L22
Q2U0P9	glycine dehydrogenase [Aspergillus oryzae 3.042]	1.749	Up	3.9746e-14	AO090011000351	116.02	156.49	32.6	26	52	26	mitochondria	alpha-amino acid catabolic process; single-organism process; glycine metabolic process; cellular metabolic process; organic substance metabolic process; glycine catabolic process; metabolic process; cellular amino acid metabolic process; cellular catabolic process; cellular process; single-organism catabolic process; oxidation-reduction process; small molecule metabolic process; single-organism c…		organic cyclic compound binding; heterocyclic compound binding; oxidoreductase activity, acting on the CH-NH2 group of donors, disulfide as acceptor; catalytic activity; binding; glycine dehydrogenase (decarboxylating) activity; ion binding; anion binding; oxidoreductase activity, acting on the CH-NH2 group of donors; cofactor binding; pyridoxal phosphate binding; oxidoreductase activity;	K00281	GLDC; glycine dehydrogenase [EC:1.4.4.2]	aor01200 Carbon metabolism - Aspergillus oryzae; aor00630 Glyoxylate and dicarboxylate metabolism - Aspergillus oryzae; aor00260 Glycine, serine and threonine metabolism - Aspergillus oryzae; aor01110 Biosynthesis of secondary metabolites - Aspergillus oryzae; aor01130 Biosynthesis of antibiotics - Aspergillus oryzae; aor01100 Metabolic pathways - Aspergillus oryzae;	IPR015424; IPR015421;	Pyridoxal phosphate-dependent transferase; Pyridoxal phosphate-dependent transferase, major region, subdomain 1;	[E]	KOG2040	Glycine dehydrogenase (decarboxylating)
Q2U0Q0	atrazine chlorohydrolase/guanine deaminase [Aspergillus oryzae 3.042]	2.797	Up	1.3957e-06	AO090011000350	57.564	60.014	18.6	8	15	8	extracellular	cellular aromatic compound metabolic process; purine nucleobase catabolic process; single-organism process; guanine metabolic process; purine-containing compound catabolic process; cellular metabolic process; organic substance metabolic process; cellular nitrogen compound catabolic process; guanine catabolic process; metabolic process; heterocycle metabolic process; nucleobase-containing compound…		guanine deaminase activity; hydrolase activity, acting on carbon-nitrogen (but not peptide) bonds, in cyclic amidines; transition metal ion binding; catalytic activity; binding; ion binding; cation binding; deaminase activity; metal ion binding; hydrolase activity; zinc ion binding; hydrolase activity, acting on carbon-nitrogen (but not peptide) bonds;	K01487	E3.5.4.3; guanine deaminase [EC:3.5.4.3]	aor00230 Purine metabolism - Aspergillus oryzae; aor01100 Metabolic pathways - Aspergillus oryzae;	IPR032466; IPR006680;	Metal-dependent hydrolase; Amidohydrolase-related;	[FQ]	KOG3968	Atrazine chlorohydrolase/guanine deaminase
Q2U0Q9	Eukaryotic translation initiation factor 3 subunit C	2.12	Up	1e-32	nip1	97.164	227.7	36.7	34	73	34	nuclear	regulation of cellular process; cellular component biogenesis; cellular component organization; ribonucleoprotein complex biogenesis; ribonucleoprotein complex assembly; regulation of macromolecule metabolic process; posttranscriptional regulation of gene expression; cellular protein metabolic process; biosynthetic process; cellular metabolic process; organic substance metabolic process; metaboli…	cell part; intracellular; translation preinitiation complex; cytoplasm; eukaryotic 43S preinitiation complex; macromolecular complex; intracellular part; protein complex; ribonucleoprotein complex; cell; eukaryotic 48S preinitiation complex; eukaryotic translation initiation factor 3 complex; cytoplasmic part;	organic cyclic compound binding; heterocyclic compound binding; translation factor activity, nucleic acid binding; RNA binding; translation initiation factor binding; binding; nucleic acid binding; translation initiation factor activity; protein binding;	K03252	EIF3C; translation initiation factor 3 subunit C	aor03013 RNA transport - Aspergillus oryzae;	IPR000717; IPR011991; IPR008905;	Proteasome component (PCI) domain; Winged helix-turn-helix DNA-binding domain; Eukaryotic translation initiation factor 3 subunit C, N-terminal domain;	[J]	KOG1076	Translation initiation factor 3, subunit c (eIF-3c)
Q2U0S9	GPI ethanolamine phosphate transferase 1	0.471	Down	0.00251967	mcd4	113.03	23.119	6.3	5	5	5	plasma membrane	GPI anchor biosynthetic process; glycolipid biosynthetic process; liposaccharide metabolic process; glycerolipid metabolic process; phosphatidylinositol biosynthetic process; membrane lipid metabolic process; phospholipid biosynthetic process; cellular protein metabolic process; single-organism process; biosynthetic process; cellular lipid metabolic process; cellular metabolic process; lipoprotei…	intracellular organelle; membrane; endoplasmic reticulum; nuclear outer membrane-endoplasmic reticulum membrane network; bounding membrane of organelle; organelle membrane; cytoplasm; intracellular organelle part; endomembrane system; intrinsic component of membrane; intracellular part; cell; integral component of membrane; organelle part; organelle; intracellular membrane-bounded organelle; endo…	transferase activity; catalytic activity;	K05285	PIGN; phosphatidylinositol glycan, class N [EC:2.7.-.-]	aor00563 Glycosylphosphatidylinositol (GPI)-anchor biosynthesis - Aspergillus oryzae; aor01100 Metabolic pathways - Aspergillus oryzae;	IPR017852; IPR017849; IPR017850;	GPI ethanolamine phosphate transferase 1, C-terminal; Alkaline phosphatase-like, alpha/beta/alpha; Alkaline-phosphatase-like, core domain;	[T]	KOG2124	Glycosylphosphatidylinositol anchor synthesis protein
Q2U0U6	acid phosphatase [Aspergillus oryzae 3.042]	4.605	Up	0.00183603	AO090011000300	46.686	9.4614	6.5	2	3	2	extracellular			hydrolase activity; catalytic activity; hydrolase activity, acting on ester bonds;				IPR007312;	Phosphoesterase;
Q2U0V6	Sterol 24-C-methyltransferase	1.765	Up	4.79236e-06	AO090011000289	42.355	167.14	56.9	15	36	15	cytosol	steroid biosynthetic process; metabolic process; single-organism biosynthetic process; single-organism metabolic process; steroid metabolic process; organic cyclic compound metabolic process; single-organism process; biosynthetic process; primary metabolic process; organic substance biosynthetic process; organic cyclic compound biosynthetic process; organic substance metabolic process; lipid meta…		transferase activity, transferring one-carbon groups; sterol 24-C-methyltransferase activity; S-adenosylmethionine-dependent methyltransferase activity; methyltransferase activity; transferase activity; catalytic activity; C-methyltransferase activity;	K00559	E2.1.1.41; sterol 24-C-methyltransferase [EC:2.1.1.41]	aor01110 Biosynthesis of secondary metabolites - Aspergillus oryzae; aor01130 Biosynthesis of antibiotics - Aspergillus oryzae; aor00100 Steroid biosynthesis - Aspergillus oryzae; aor01100 Metabolic pathways - Aspergillus oryzae;	IPR030384; IPR013705; IPR029063; IPR013216;	SAM-dependent methyltransferase SMT-type; Sterol methyltransferase C-terminal; S-adenosyl-L-methionine-dependent methyltransferase; Methyltransferase type 11;	[IR]	KOG1269	SAM-dependent methyltransferases
Q2U100	Mannitol 2-dehydrogenase	1.656	Up	2.26637e-06	AO090011000230	56.251	104.65	37.8	17	34	17	cytosol	single-organism process; metabolic process; oxidation-reduction process; single-organism metabolic process;	extracellular region;	oxidoreductase activity, acting on CH-OH group of donors; oxidoreductase activity, acting on the CH-OH group of donors, NAD or NADP as acceptor; catalytic activity; binding; mannitol 2-dehydrogenase activity; cofactor binding; oxidoreductase activity; coenzyme binding;	K00045	E1.1.1.67; mannitol 2-dehydrogenase [EC:1.1.1.67]	aor00051 Fructose and mannose metabolism - Aspergillus oryzae;	IPR008927; IPR013328; IPR013118; IPR013131; IPR016040;	6-phosphogluconate dehydrogenase C-terminal domain-like; 6-phosphogluconate dehydrogenase, domain 2; Mannitol dehydrogenase, C-terminal; Mannitol dehydrogenase, N-terminal; NAD(P)-binding domain;
Q2U104		6.538	Up	0.0278411	AO090011000225	19.562	8.6683	15.5	4	6	4	cytosol	glucosamine-containing compound metabolic process; metabolic process; chitin metabolic process; carbohydrate derivative metabolic process; nitrogen compound metabolic process; amino sugar metabolic process; macromolecule metabolic process; aminoglycan metabolic process; organonitrogen compound metabolic process; organic substance metabolic process;	extracellular region;	chitin binding; carbohydrate derivative binding; binding;				IPR002557;	Chitin binding domain;
Q2U165	phosphoglycerate mutase [Aspergillus oryzae 3.042]	1.815	Up	0.000222325	AO090011000152	27.991	27.061	40.7	9	13	9	nuclear				K15634	gpmB; probable phosphoglycerate mutase [EC:5.4.2.12]	aor01200 Carbon metabolism - Aspergillus oryzae; aor00010 Glycolysis / Gluconeogenesis - Aspergillus oryzae; aor00260 Glycine, serine and threonine metabolism - Aspergillus oryzae; aor01110 Biosynthesis of secondary metabolites - Aspergillus oryzae; aor01130 Biosynthesis of antibiotics - Aspergillus oryzae; aor00680 Methane metabolism - Aspergillus oryzae; aor01230 Biosynthesis of amino acids - A…			[G]	KOG0235	Phosphoglycerate mutase
Q2U193	cell wall serine-threonine-rich galactomannoprotein [Aspergillus oryzae 3.042]	1.922	Up	0.0375067	AO090011000119	26.309	18.317	19	4	6	4	extracellular
Q2U1A0		1.981	Up	0.0188887	AO090011000112	48.949	20.618	15.2	7	11	7	extracellular							IPR027589; IPR011048;	Choice-of-anchor B domain; Cytochrome cd1-nitrite reductase-like, haem d1 domain;
Q2U1A3	nuclear envelope protein [Aspergillus oryzae 3.042]	0.248	Down	0.00341378	AO090011000109	51.414	5.6623	4.9	2	3	2	nuclear	RNA transport; cellular component organization; nucleus organization; intracellular transport; endomembrane system organization; mRNA transport; single-organism process; nuclear transport; nuclear export; protein transport; establishment of RNA localization; nuclear envelope organization; establishment of localization; organic substance metabolic process; metabolic process; establishment of local…	membrane; intracellular organelle; organelle membrane; nuclear envelope; intracellular organelle part; organelle envelope; endomembrane system; intracellular part; cell; organelle part; organelle; intracellular membrane-bounded organelle; nuclear membrane; nucleus; cell part; intracellular; envelope; membrane-bounded organelle; nuclear part;					IPR018767;	Brl1/Brr6 domain;	[S]	KOG4503	Uncharacterized conserved membrane protein
Q2U1B7	pre-mRNA-splicing factor cwc26 [Aspergillus oryzae 3.042]	0.273	Down	0.00545274	AO090011000095	37.148	5.1933	8.1	3	3	3	nuclear				K13106					[S]	KOG2654	Uncharacterized conserved protein
Q2U1E1		1.696	Up	0.000140222	AO090011000066	56.269	35.757	16.8	8	17	8	extracellular							IPR010799; IPR015995;	Microcystin LR degradation protein MlrC, C-terminal; Microcystin LR degradation protein MlrC, N-terminal;
Q2U1F3	Leucine aminopeptidase A	5.001	Up	3.25e-12	lapA	41.104	163.72	37.1	11	47	11	extracellular	proteolysis; metabolic process; macromolecule metabolic process; protein metabolic process; primary metabolic process; organic substance metabolic process;	extracellular region;	peptidase activity; exopeptidase activity; catalytic activity; binding; ion binding; cation binding; metal ion binding; peptidase activity, acting on L-amino acid peptides; aminopeptidase activity; hydrolase activity;	K05994			IPR007484;	Peptidase M28;	[OPR]	KOG2195	Transferrin receptor and related proteins containing the protease-associated (PA) domain
Q2U1G7	Extracellular metalloproteinase NpI	4.314	Up	1e-32	NpI	69.17	222.9	40.1	20	61	20	extracellular		extracellular space; extracellular region part; extracellular region;	endopeptidase activity; metalloendopeptidase activity; peptidase activity; transition metal ion binding; catalytic activity; binding; ion binding; cation binding; metal ion binding; peptidase activity, acting on L-amino acid peptides; hydrolase activity; metallopeptidase activity; zinc ion binding;	K01417			IPR011096;	FTP domain;
Q2U1V5	monooxygenase [Aspergillus oryzae 3.042]	0.657	Down	0.00916265	AO090138000082	48.084	21.842	17.4	7	9	7	cytosol	single-organism process; metabolic process; oxidation-reduction process; single-organism metabolic process;		organic cyclic compound binding; heterocyclic compound binding; nucleoside phosphate binding; flavin adenine dinucleotide binding; catalytic activity; binding; ion binding; anion binding; nucleotide binding; cofactor binding; oxidoreductase activity; small molecule binding; FAD binding; coenzyme binding;				IPR002938; IPR023753;	FAD-binding domain; FAD/NAD(P)-binding domain;
Q2U1W2	L-aminopeptidase/D-esterase [Aspergillus oryzae 3.042]	0.647	Down	0.00288843	AO090138000075	41.083	24.79	16.6	6	12	6	mitochondria	cellular macromolecule catabolic process; cellular protein catabolic process; cellular protein metabolic process; primary metabolic process; cellular metabolic process; organic substance metabolic process; organic substance catabolic process; metabolic process; protein catabolic process; macromolecule catabolic process; cellular macromolecule metabolic process; cellular catabolic process; proteol…		peptidase activity, acting on L-amino acid peptides; aminopeptidase activity; hydrolase activity; peptidase activity; exopeptidase activity; catalytic activity;	K01266			IPR016117;	ArgJ-like domain;
Q2U1X1	deoxyribose-phosphate aldolase [Aspergillus oryzae 3.042]	0.075	Down	1.07113e-06	AO090138000062	28.076	27.298	24.1	6	10	6	cytosol	cellular aromatic compound metabolic process; organophosphate catabolic process; nucleotide metabolic process; single-organism process; deoxyribonucleotide metabolic process; cellular metabolic process; phosphate-containing compound metabolic process; organic substance metabolic process; cellular nitrogen compound catabolic process; metabolic process; nucleoside phosphate catabolic process; heter…	intracellular part; cell; cell part; intracellular; cytoplasm;	lyase activity; deoxyribose-phosphate aldolase activity; aldehyde-lyase activity; catalytic activity; carbon-carbon lyase activity;	K01619	deoC; deoxyribose-phosphate aldolase [EC:4.1.2.4]	aor00030 Pentose phosphate pathway - Aspergillus oryzae;	IPR013785;	Aldolase-type TIM barrel;
Q2U1X4		0.27	Down	0.0472	AO090138000059	19.966	6.8389	26.1	5	5	5	nuclear
Q2U1X8	"Probable arabinan endo-1,5-alpha-L-arabinosidase C"	1.881	Up	0.041826	abnC	34.189	12.549	12.3	4	7	4	extracellular	single-organism carbohydrate catabolic process; single-organism catabolic process; cell wall macromolecule metabolic process; single-organism process; primary metabolic process; carbohydrate metabolic process; polysaccharide catabolic process; cellular metabolic process; xylan metabolic process; hemicellulose metabolic process; carbohydrate catabolic process; organic substance metabolic process; …	extracellular region;	hydrolase activity, hydrolyzing O-glycosyl compounds; hydrolase activity; arabinan endo-1,5-alpha-L-arabinosidase activity; catalytic activity; hydrolase activity, acting on glycosyl bonds;	K06113			IPR023296;	Glycosyl hydrolase, five-bladed beta-propellor domain;
Q2U1Z2	FAD-dependent oxidoreductase [Aspergillus oryzae 3.042]	7.531	Up	5.79581e-12	AO090138000040	49.507	68.778	29.8	14	29	14	plasma membrane	single-organism process; metabolic process; oxidation-reduction process; single-organism metabolic process;		catalytic activity; oxidoreductase activity;	K00306	PIPOX; sarcosine oxidase / L-pipecolate oxidase [EC:1.5.3.1 1.5.3.7]	aor00260 Glycine, serine and threonine metabolism - Aspergillus oryzae; aor00310 Lysine degradation - Aspergillus oryzae; aor04146 Peroxisome - Aspergillus oryzae; aor01100 Metabolic pathways - Aspergillus oryzae;	IPR006076; IPR023753;	FAD dependent oxidoreductase; FAD/NAD(P)-binding domain;	[R]	KOG2820	FAD-dependent oxidoreductase
Q2U1Z6	phenylpropionate dioxygenase [Aspergillus oryzae 3.042]	3.912	Up	4.1348e-10	AO090138000036	47.367	85.408	38.7	15	31	15	cytosol	aromatic compound catabolic process; metabolic process; cellular aromatic compound metabolic process; oxidation-reduction process; single-organism metabolic process; cellular catabolic process; single-organism process; cellular metabolic process; cellular process; catabolic process;		2 iron, 2 sulfur cluster binding; oxidoreductase activity, acting on paired donors, with incorporation or reduction of molecular oxygen, NAD(P)H as one donor, and incorporation of two atoms of oxygen into one donor; iron ion binding; transition metal ion binding; catalytic activity; dioxygenase activity; binding; iron-sulfur cluster binding; ion binding; cation binding; metal ion binding; oxidore…				IPR017941; IPR001663; IPR015879;	Rieske [2Fe-2S] iron-sulphur domain; Aromatic-ring-hydroxylating dioxygenase, alpha subunit; Aromatic-ring-hydroxylating dioxygenase, alpha subunit, C-terminal domain;
Q2U243		1.558	Up	0.00102445	AO090038000609	28.879	14.856	20.1	4	4	4	cytosol	sulfur compound metabolic process; peptide metabolic process; peptide biosynthetic process; cellular modified amino acid biosynthetic process; nitrogen compound metabolic process; biosynthetic process; cellular amide metabolic process; organonitrogen compound biosynthetic process; organic substance biosynthetic process; cellular metabolic process; cellular biosynthetic process; sulfur compound bi…		gamma-glutamylcyclotransferase activity; transferase activity, transferring acyl groups; catalytic activity; transferase activity; transferase activity, transferring amino-acyl groups;				IPR013024;	Gamma-glutamyl cyclotransferase-like;
Q2U248	"cAMP-dependent protein kinase pathway protein (Som1), putative [Aspergillus oryzae 3.042]"	0.308	Down	0.0103514	AO090038000604	84.536	19.325	8.4	5	7	5	nuclear			protein binding; binding;				IPR006594;	LIS1 homology motif;
[truncated: 794 more rows]

## Sheet: 12-28C-Svs12-28C-L diff protein
Protein accession	Protein description	12-28C-Svs12-28C-L Ratio	Regulated Type	P value	Gene name	MW [kDa]	Score	Coverage [%]	#Peptides	#PSMs	#Unique peptides	Subcellular Location	Biological Process	Cellular Component	Molecular Function	KEGG KO No.	KEGG Gene	KEGG pathway	IPR ID	Domain description	KOG category	KOG number	KOG description
[truncated: 1,144 more rows]

[truncated: 5 more sheets: 0-28C-Svs0-28C-L diff protein, 0-28C-Svs0-16C-S diff protein, 0-28C-Svs12-28C-S diff protein, 0-28C-Lvs0-16C-L diff protein, 0-28C-Lvs12-28C-L diff protein]
